# Supplementary material for: Magnetism, Conductivity and Spin-Spin Interactions in Layered Hybrid Structure of Anionic Radicals [Ni(dmit)2] Alternated by Iron(III) Spin-Crossover Complex [Fe(III)(3-OMe-Sal2trien)] and Ferric Moiety Precursors
Source: MDPI journal article supplement (doi:10.3390/molecules25214922), 2020-10-24
Supplement: s1 [file s1]

**Magnetism, Conductivity and Spin-Spin Interactions in Layered Hybrid Structure of Anionic Radicals [Ni(dmit)<sub>2</sub>] Alternated by Iron(III) Spin-Crossover Complex [Fe(III)(3-OMe-Sal<sub>2</sub>trien)] and Ferric Moiety Precursors.**

Yuri N. Shvachko <sup>1\*</sup>, Nataliya G. Spitsyna <sup>2</sup>, Denis V. Starichenko <sup>1</sup>, Vladimir N. Zverev <sup>3</sup>,  
Leokadiya V. Zorina<sup>3</sup>, Sergey V. Simonov <sup>3</sup>, Maksim A. Blagov <sup>2,4</sup>, Eduard B. Yagubskii <sup>2\*</sup>

<sup>1</sup> M.N. Miheev Institute of Metal Physics UB RAS, 620108 Yekaterinburg, Russia

<sup>2</sup> Institute of Problems of Chemical Physics RAS, 142432 Chernogolovka MD, Russia

<sup>3</sup> Institute of Solid State Physics RAS, 143432 Chernogolovka MD, Russia

<sup>4</sup> Lomonosov Moscow State University, 119991 Moscow, Russia

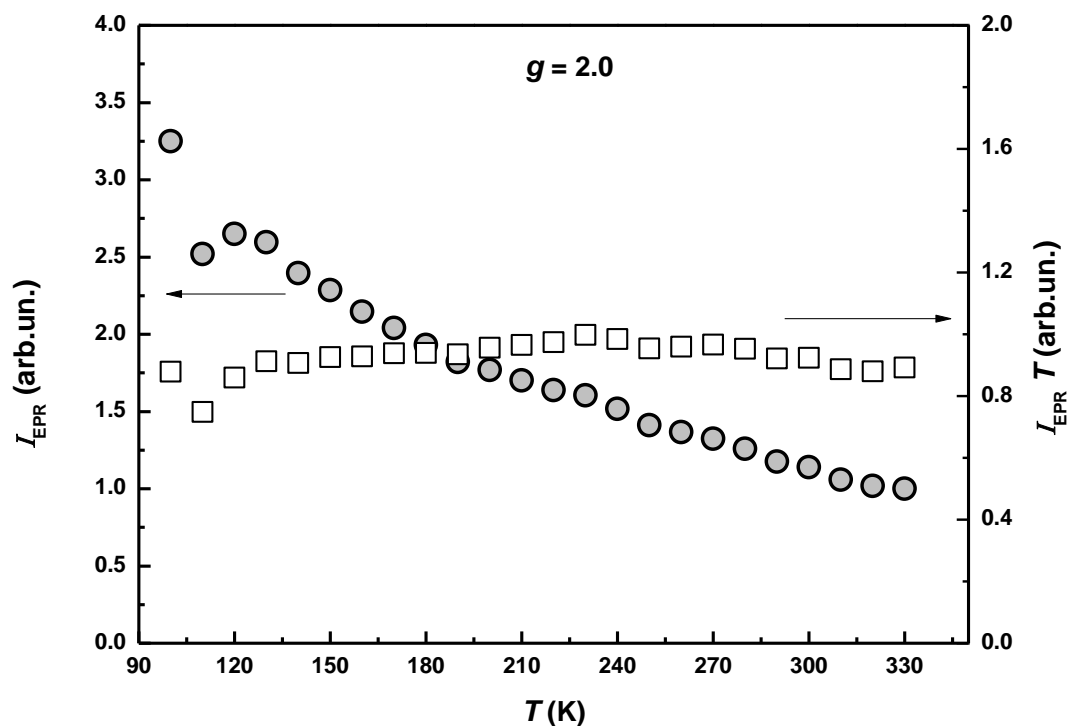

**Figure S1.** Temperature dependence of the product,  $I_{\text{EPR}}T$ , and the relative intensity value,  $I_{\text{EPR}}$ , for the LS fraction  $S = 1/2$  spin moments in **1**.

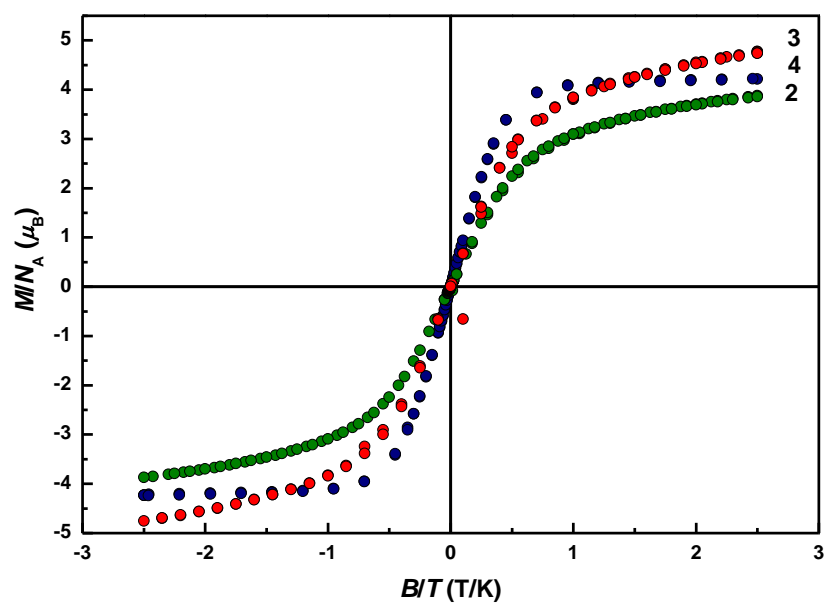

**Figure S2.** Field dependences of the magnetization,  $M(B/T)$ , for **1** ( $T = 2.0$  K) for intermediate  $T$ -cycles (2, 3, 4 – order of cycles).

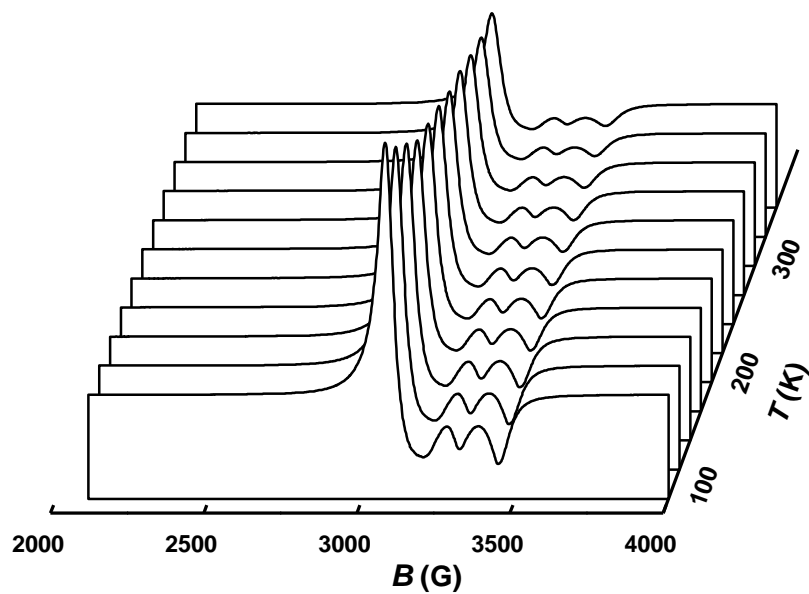

**Figure S3.** Temperature evolution of the EPR spectrum for **2**.

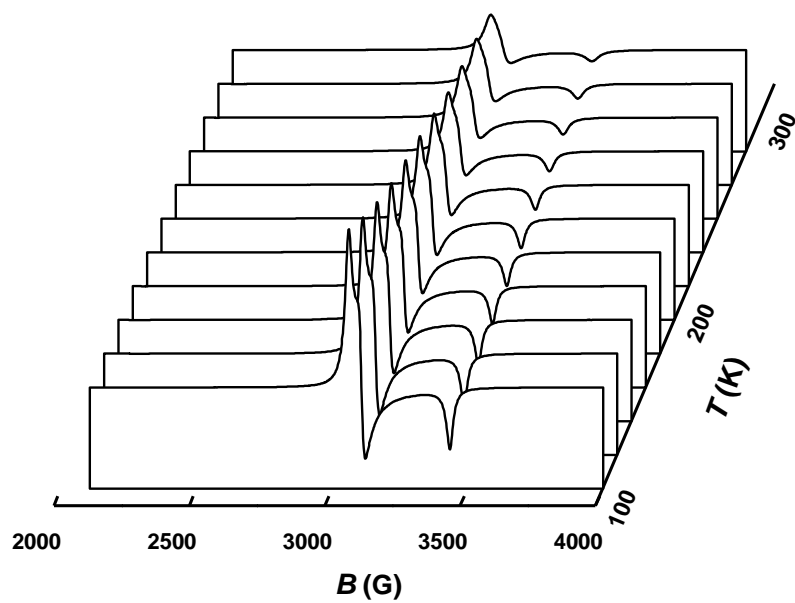

**Figure S4.** Temperature evolution of the EPR spectrum for **3**.

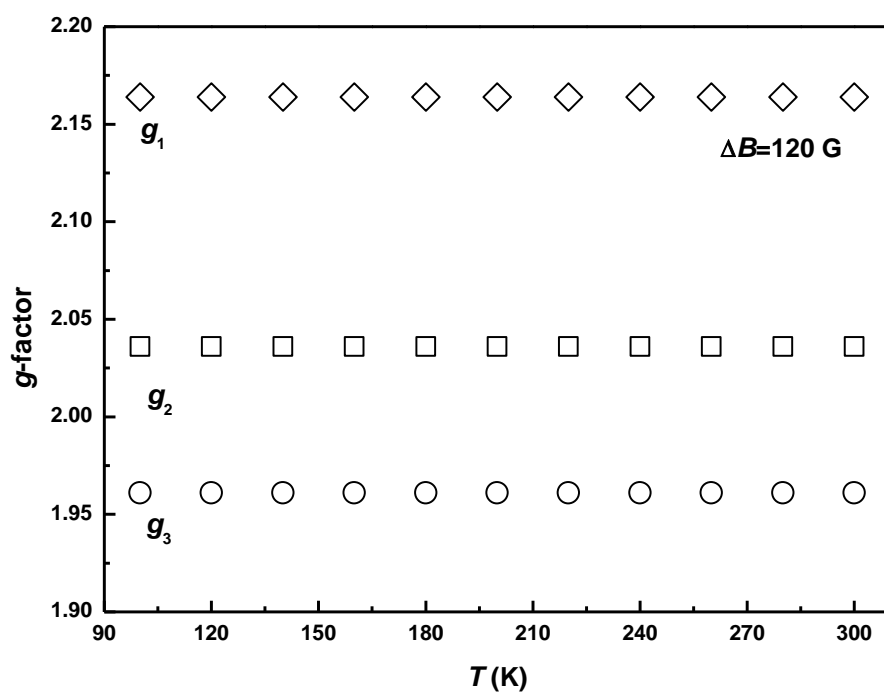

**Figure S5.** Temperature evolution components of  $g$ -tensor of the EPR spectrum:  $g_1$ ,  $g_2$ ,  $g_3$  for **2**.

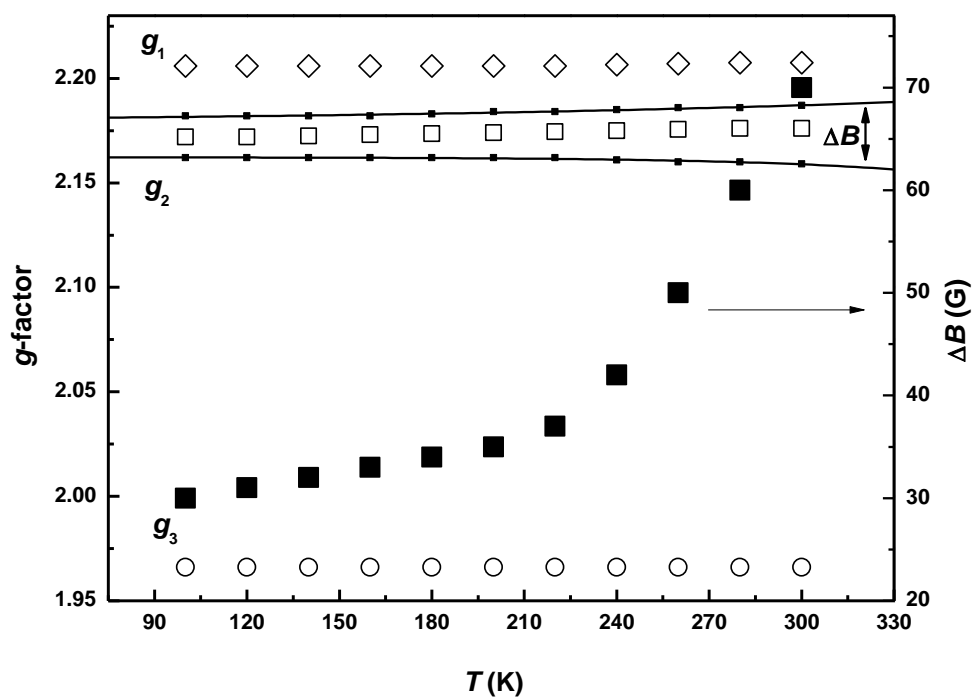

**Figure S6.** Temperature evolution components of  $g$ -tensor of the EPR spectrum:  $g_1$ ,  $g_2$ ,  $g_3$  for **3** (left scale) and linewidth,  $\Delta B(T)$  (right scale).

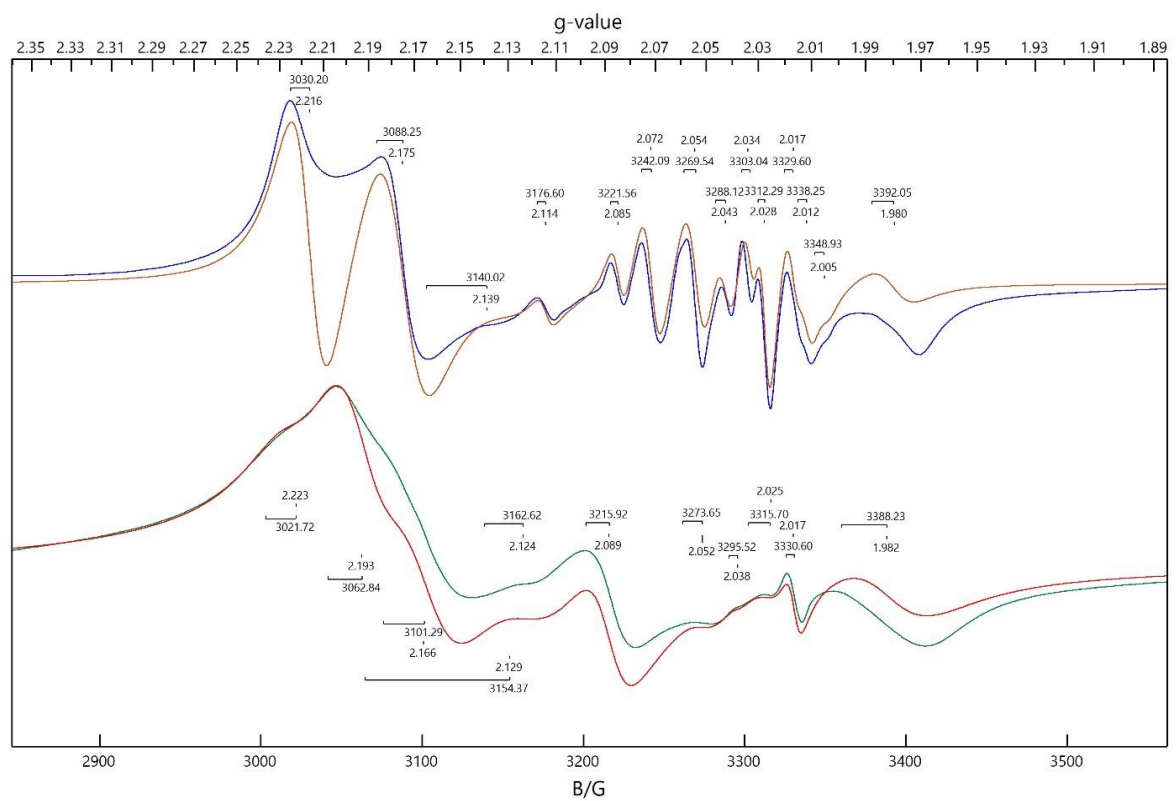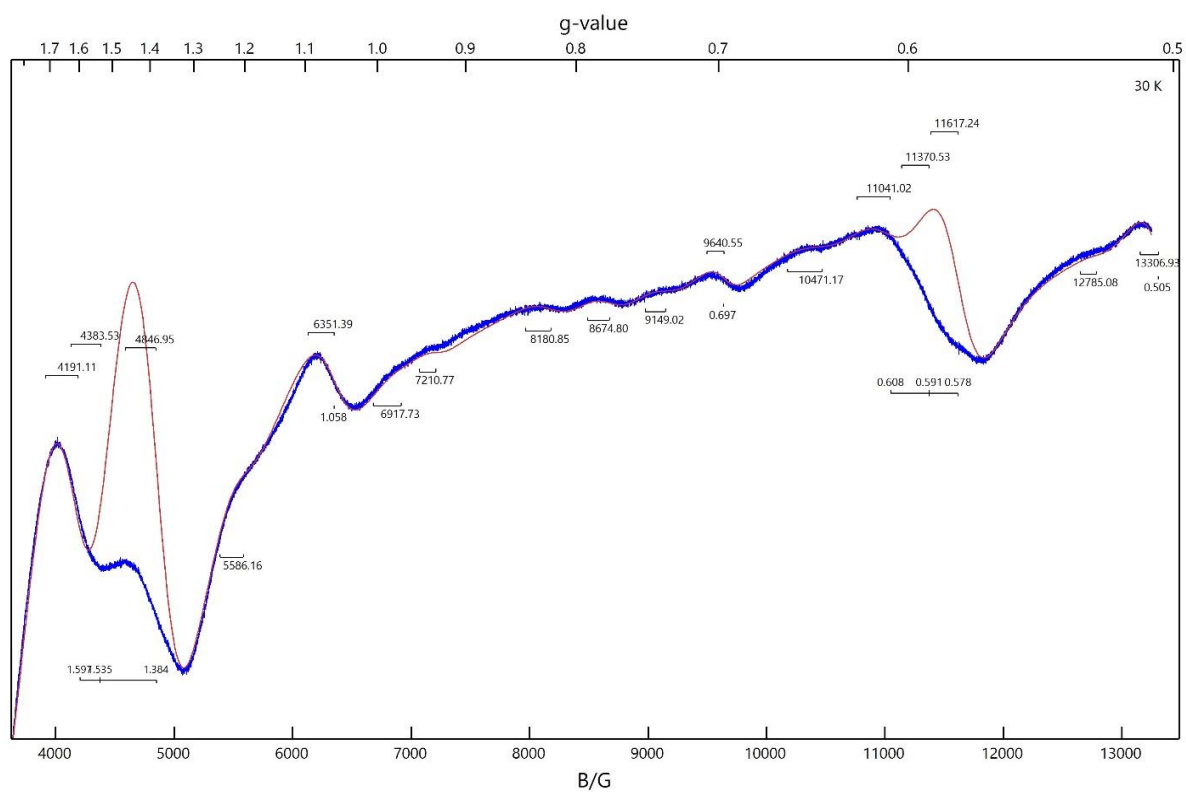

**Figure S7.** Total EPR spectrum of **1** at 100 K (low- and high-field segments) and respective simulations

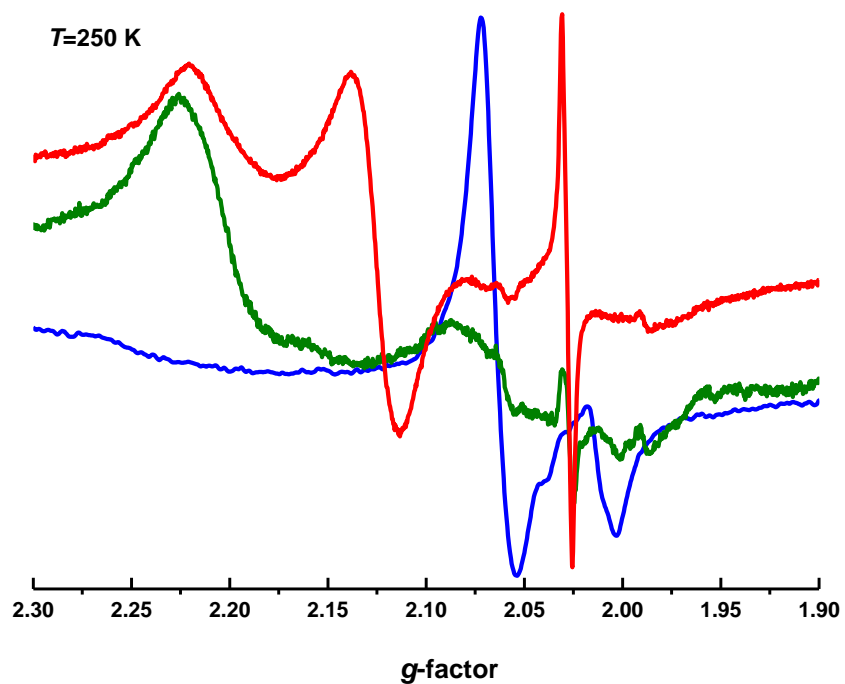

**Figure S8.** Comparison of the EPR spectra in the vicinity of  $g \sim 2.0$  at 250 K for **1** at thermocycling. Blue line – original **1**, green line – after thermocyclings, red line – isostructural compound  $[\text{Fe(III)(3-OMe-Sal}_2\text{trien)}][\text{Au(dmit)}_2]$  [10].

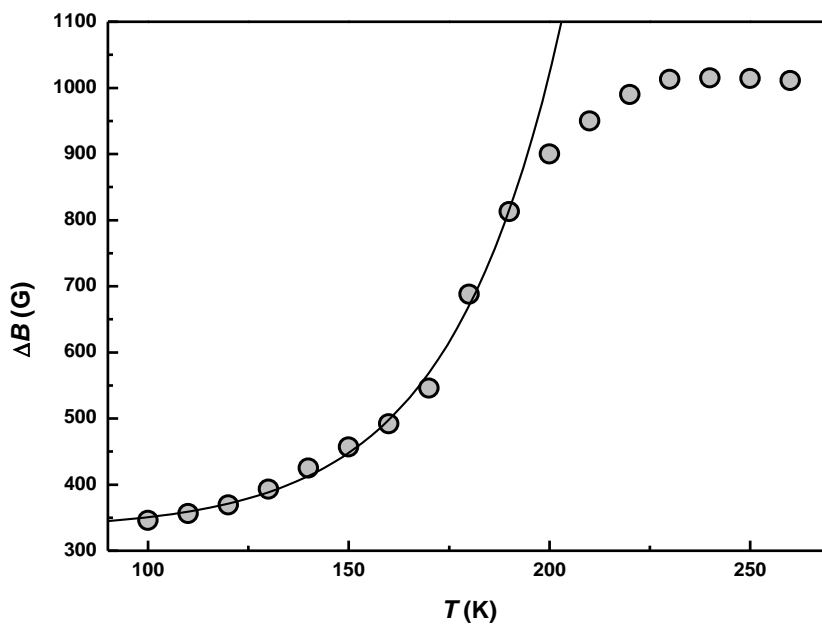

**Figure S9.** Temperature dependence of the EPR linewidth,  $\Delta B_2^{\text{HS}}$ , corresponding to the  $g_2^{\text{HS}}$  of the HS phase of **1**.

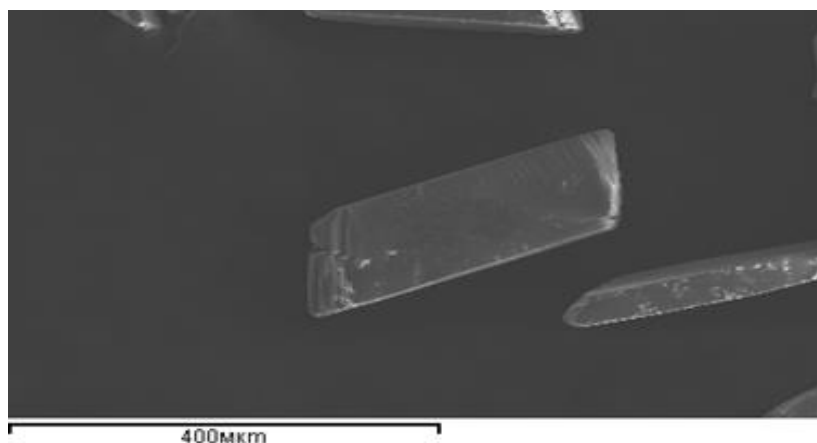

a)

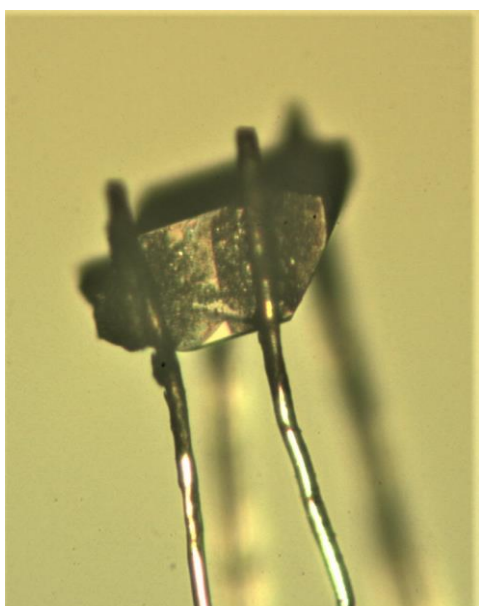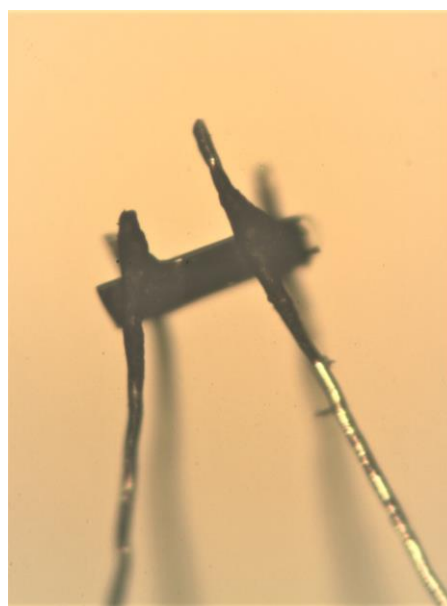

b)

**Figure S10.** Photos single crystals of  $[\text{Fe}(\text{3-OMe-Sal}_2\text{trien})][\text{Ni}(\text{dmit})_2]$  (**1**): immediately synthesized (upper photo **a**); during resistance measurements  $J \parallel c$  (“transverse”), and  $J \perp c$  (“in-plane”) - left and right panels photo **b**, respectively.

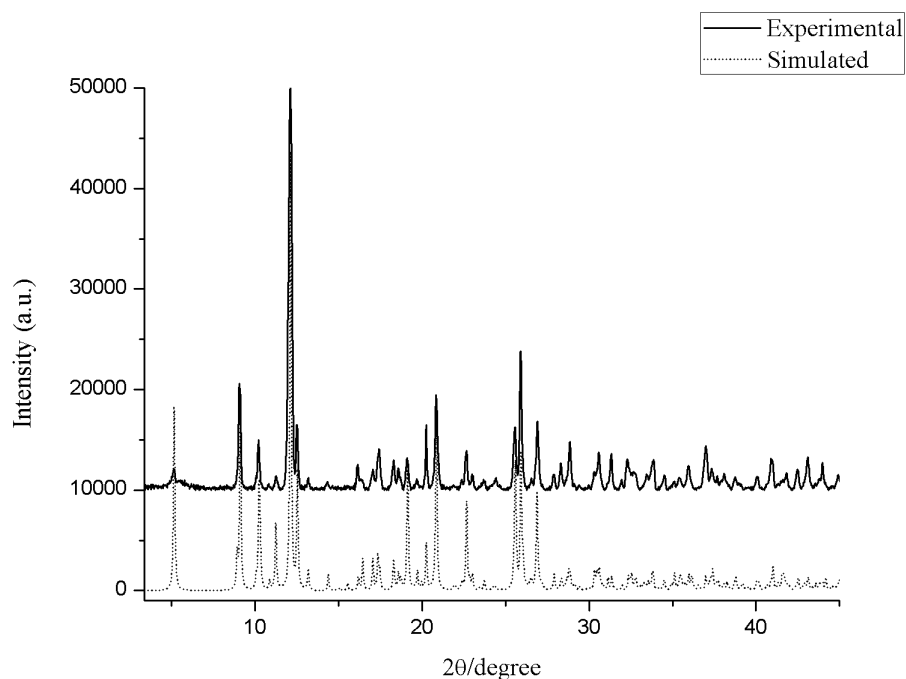

**Figure S11.** Experimental powder X-ray diffraction pattern of  $[\text{Fe}(\text{3-OMe-Sal}_2\text{trien})][\text{Ni}(\text{dmit})_2]$  (**1**, solid) at room temperature compared with the simulated pattern from the single crystal X-ray data at 297 K (dots).

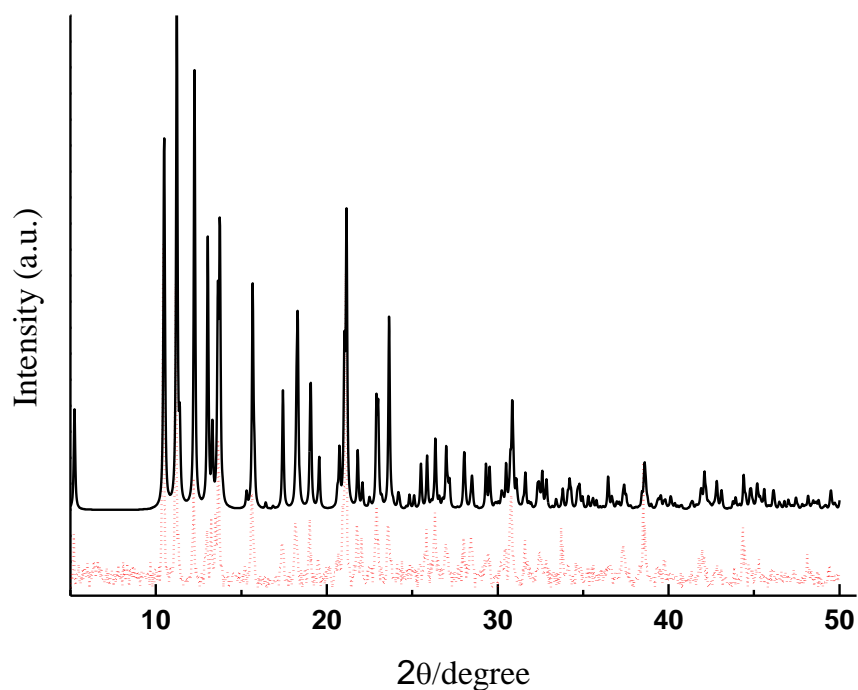

**Figure S12.** Experimental powder X-ray diffraction pattern of  $[\text{Fe}(\text{3-OMe-Sal}_2\text{trien})]\text{NO}_3 \cdot \text{H}_2\text{O}$  (**2**, solid) at room temperature compared with the simulated pattern from the single crystal X-ray data at 297 K (dots).



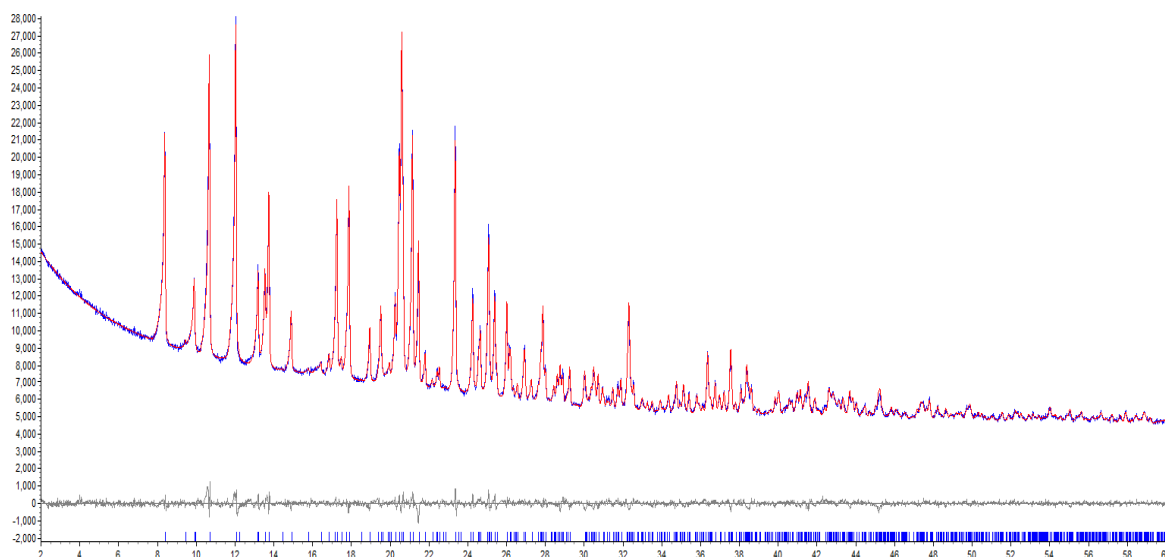

**Figure S13.** Analysis for a full-profile refinement using the Rietveld method, which made it possible to confirm not only the lattice parameters, but also the structure, was made. The experimental powder X-ray diffraction pattern of  $[\text{Fe}(\text{3-OMe-Sal}_2\text{trien})]\text{I}$  (**3**, blue line) at room temperature, red - calculated, gray - difference curve.

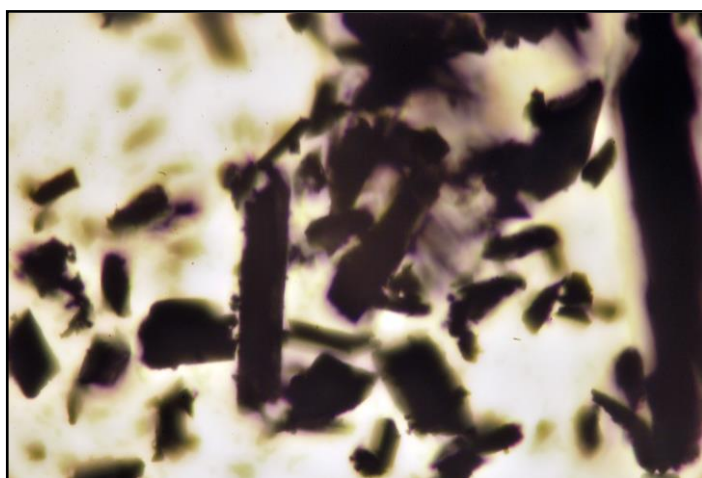

(a)

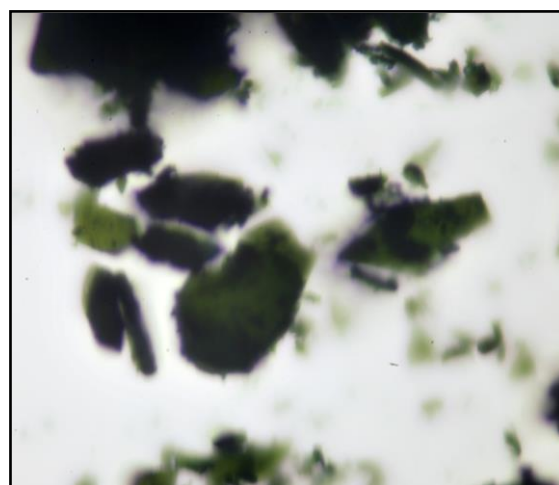

(b)

**Figure S14.** Grinded polycrystals of **1** (a) and **2** (b) used in SQUID and EPR measurements. Pure green color of the transparent particles confirms LS ground state of **2**. Violet and brownish tones for **1** confirm presence of the HS phase in the ground state.

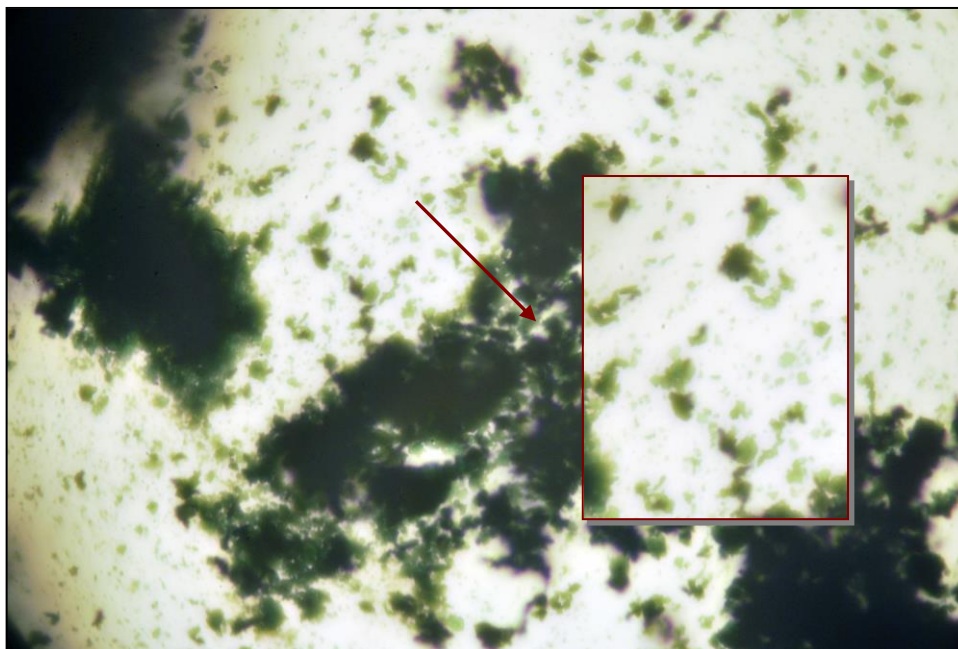

**Figure S14c.** Grinded polycrystals of **3** used in SQUID and EPR measurements. Pure green color of the transparent particles confirms LS ground state of **3**.

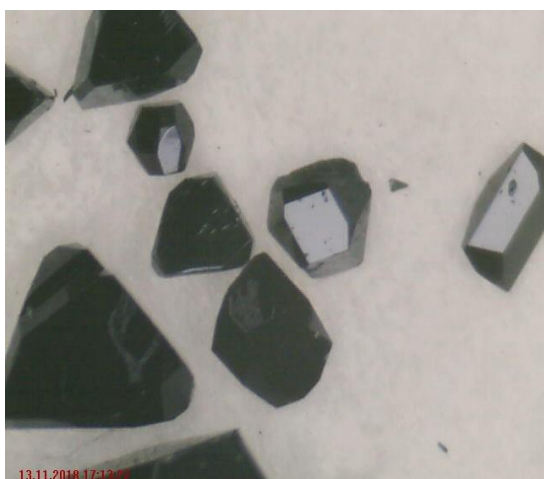

**(a)**

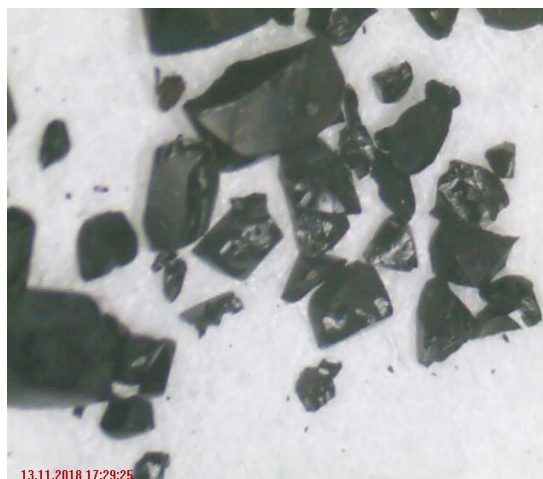

**(b)**

**Figure S15.** Optical microscopy images of the polycrystalline product of **3**: **(a)** Single crystals selected for SCXRD, **(b)** part of the polycrystalline sample selected for SQUID and EPR experiments.

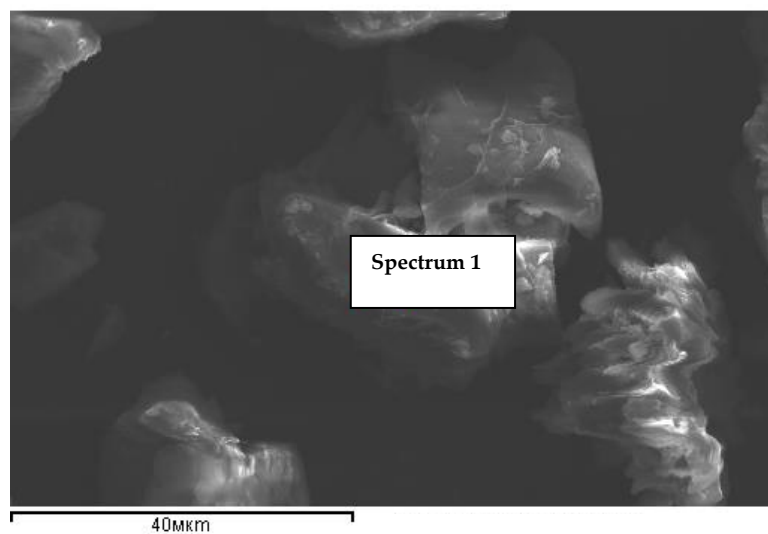

**Figure S15c.** Image of the sample **3** for RSMA.

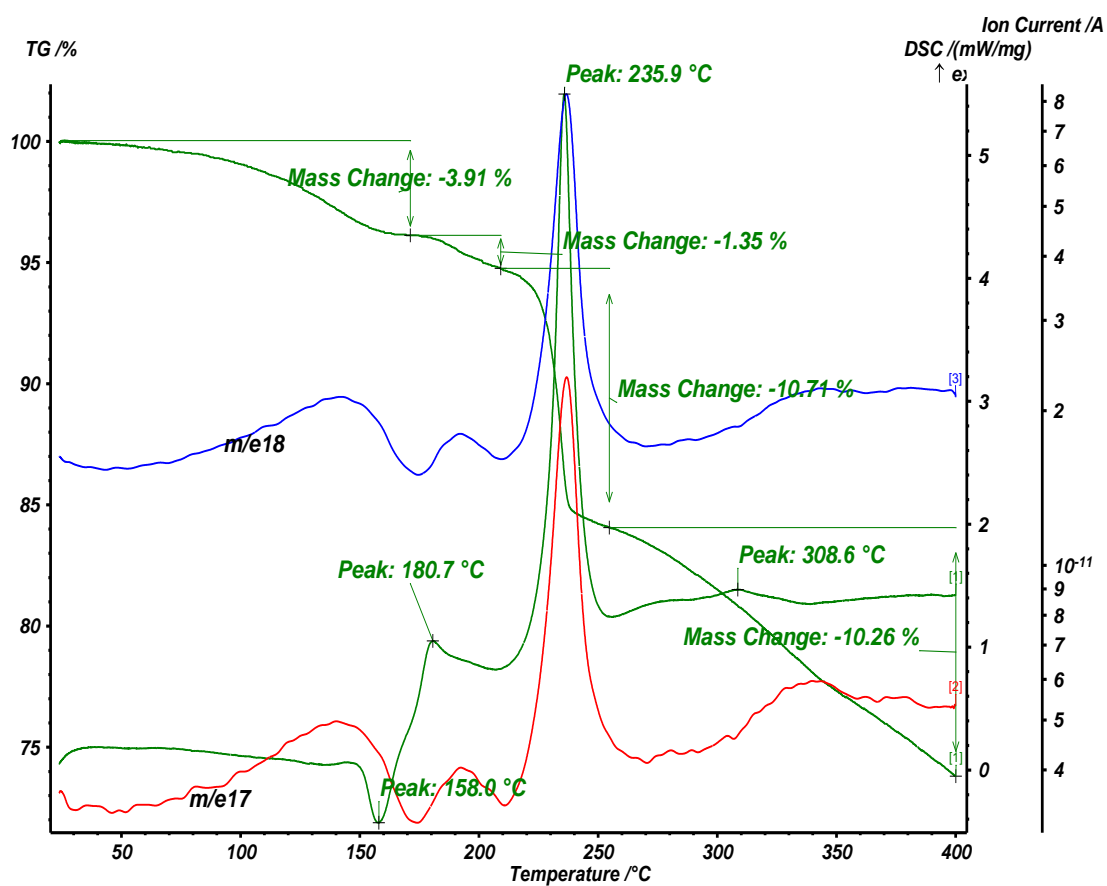

**a**

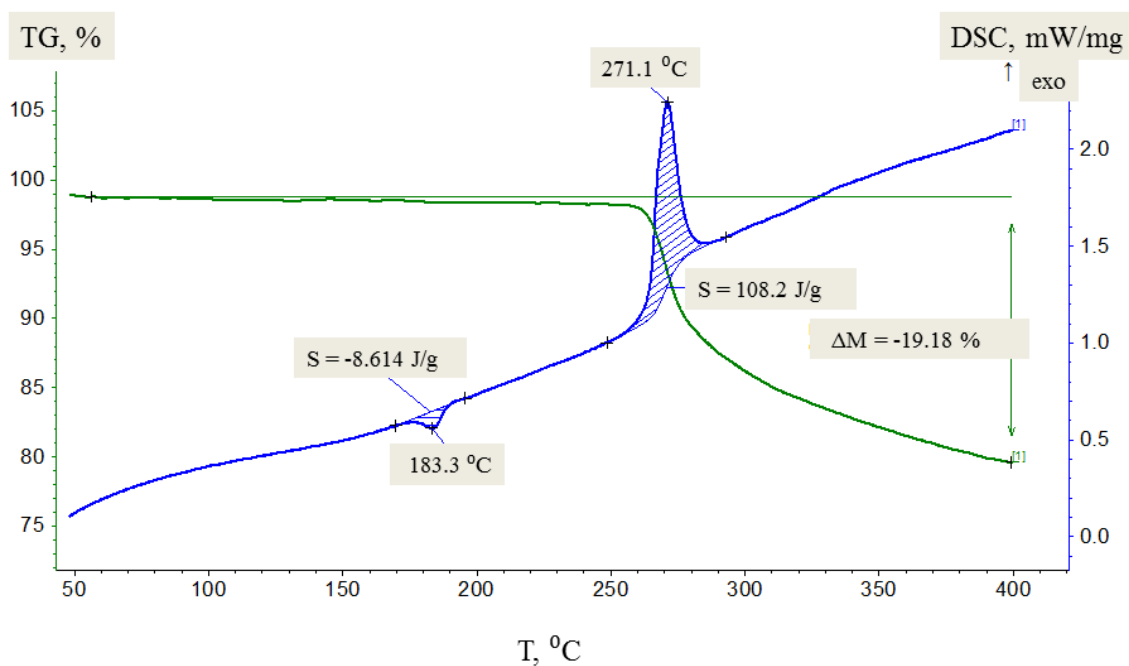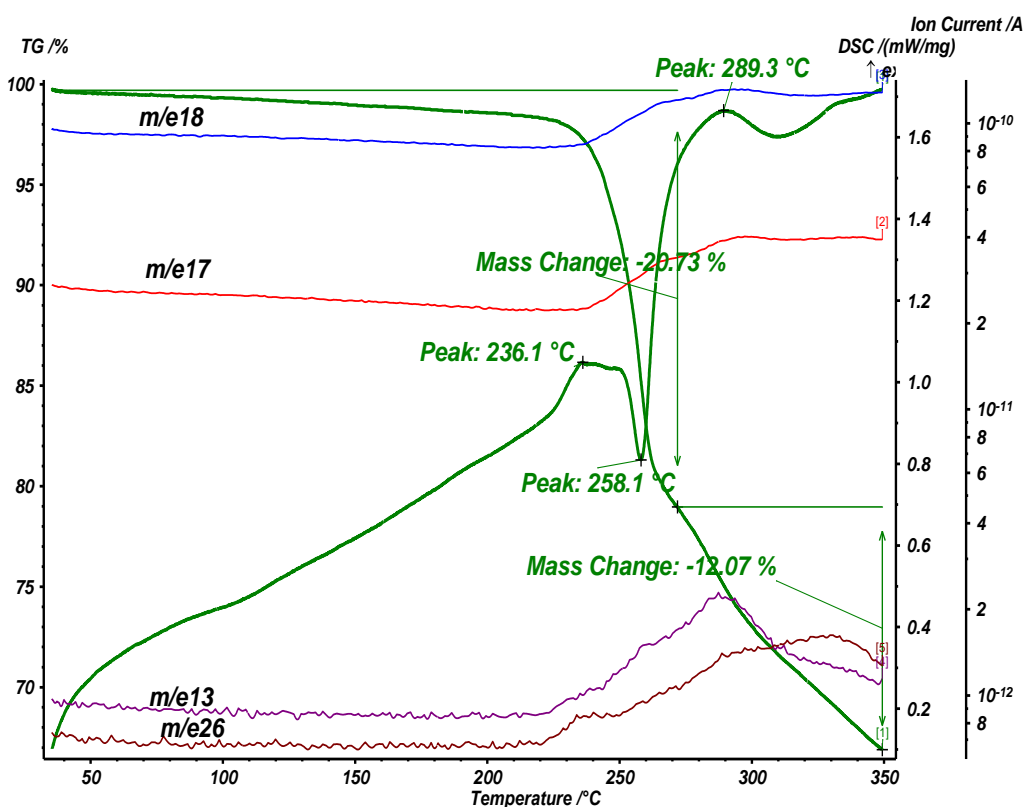

**Figure S16.** The thermograms of  $[\text{Fe}(\text{3-OMe-Sal}_2\text{trien})](\text{NO}_3) \cdot \text{H}_2\text{O} (2 \cdot \text{H}_2\text{O})$  (a),  $[\text{Fe}(\text{3-OMe-Sal}_2\text{trien})]\text{I}$  (3) (b) and  $[\text{Fe}(\text{3-OMe-Sal}_2\text{trien})][\text{Ni}(\text{dmit})_2]$  (1) (c).
