# Supplementary material for: Magnetism, Conductivity and Spin-Spin Interactions in Layered Hybrid Structure of Anionic Radicals [Ni(dmit)2] Alternated by Iron(III) Spin-Crossover Complex [Fe(III)(3-OMe-Sal2trien)] and Ferric Moiety Precursors
Source: Molecules. 2020 Oct 24;25(21):4922. doi: 10.3390/molecules25214922 (PMC7663777; doi:10.3390/molecules25214922)
Supplement: Supplementary file 1 [file molecules-25-04922-s001.zip]

Archive with 11 entries (11 files):
- Supplementary-materials_for_Molecules.pdf
- 1_120K.cif
- 1_120K_checkcif.pdf
- 2_120K.cif
- 2_120K_checkcif.pdf
- 3_100K.cif
- 3_100K_checkcif.pdf
- 3_293K.cif
- 3_293K_checkcif.pdf
- 2_293K.cif
- 2_293K_checkcif.pdf
