# Supplementary material for: Magnetism, Conductivity and Spin-Spin Interactions in Layered Hybrid Structure of Anionic Radicals [Ni(dmit)2] Alternated by Iron(III) Spin-Crossover Complex [Fe(III)(3-OMe-Sal2trien)] and Ferric Moiety Precursors
Source: Molecules. 2020 Oct 24;25(21):4922. doi: 10.3390/molecules25214922 (PMC7663777; doi:10.3390/molecules25214922)
Supplement: Supplementary file 1 [file molecules-25-04922-s001.zip › 1_120K.cif]

 
data_1-120K 
 
_audit_creation_method            SHELXL-97 
_chemical_name_systematic 
; 
 ? 
; 
_chemical_name_common             ? 
_chemical_melting_point           ? 
_chemical_formula_moiety
 'C22 H28 Fe N4 O4, C6 Ni S10'
_chemical_formula_sum 
 'C28 H28 Fe N4 Ni O4 S10' 
_chemical_formula_weight          919.70 
 
loop_ 
 _atom_type_symbol 
 _atom_type_description 
 _atom_type_scat_dispersion_real 
 _atom_type_scat_dispersion_imag 
 _atom_type_scat_source 
 'C'  'C'   0.0033   0.0016 
 'International Tables Vol C Tables 4.2.6.8 and 6.1.1.4' 
 'H'  'H'   0.0000   0.0000 
 'International Tables Vol C Tables 4.2.6.8 and 6.1.1.4' 
 'N'  'N'   0.0061   0.0033 
 'International Tables Vol C Tables 4.2.6.8 and 6.1.1.4' 
 'O'  'O'   0.0106   0.0060 
 'International Tables Vol C Tables 4.2.6.8 and 6.1.1.4' 
 'Fe'  'Fe'   0.3463   0.8444 
 'International Tables Vol C Tables 4.2.6.8 and 6.1.1.4' 
 'Ni'  'Ni'   0.3393   1.1124 
 'International Tables Vol C Tables 4.2.6.8 and 6.1.1.4' 
 'S'  'S'   0.1246   0.1234 
 'International Tables Vol C Tables 4.2.6.8 and 6.1.1.4' 
 
_symmetry_cell_setting            Triclinic
_symmetry_space_group_name_H-M    'P -1'
_symmetry_space_group_name_Hall   '-P 1'
 
loop_ 
 _symmetry_equiv_pos_as_xyz 
 'x, y, z' 
 '-x, -y, -z' 
 
_cell_length_a                    10.4149(8) 
_cell_length_b                    10.8546(9) 
_cell_length_c                    17.6618(14) 
_cell_angle_alpha                 74.1779(16) 
_cell_angle_beta                  80.2564(16) 
_cell_angle_gamma                 68.4839(15) 
_cell_volume                      1781.8(2) 
_cell_formula_units_Z             2 
_cell_measurement_temperature     120(2) 
_cell_measurement_reflns_used     807
_cell_measurement_theta_min       3
_cell_measurement_theta_max       29
 
_exptl_crystal_description        prism 
_exptl_crystal_colour             black 
_exptl_crystal_size_max           0.22 
_exptl_crystal_size_mid           0.15 
_exptl_crystal_size_min           0.14 
_exptl_crystal_density_meas       ? 
_exptl_crystal_density_diffrn     1.714 
_exptl_crystal_density_method     'not measured' 
_exptl_crystal_F_000              940 
_exptl_absorpt_coefficient_mu     1.563 
_exptl_absorpt_correction_type    multi-scan
_exptl_absorpt_correction_T_min   0.725
_exptl_absorpt_correction_T_max   0.811
_exptl_absorpt_process_details    'SADABS'
 
_exptl_special_details 
; 
 ? 
; 
 
_diffrn_ambient_temperature       120(2) 
_diffrn_radiation_wavelength      0.71073 
_diffrn_radiation_type            MoK\a 
_diffrn_radiation_source          'fine-focus sealed tube' 
_diffrn_radiation_monochromator   graphite 
_diffrn_measurement_device_type   'Bruker APEX II CCD area detector''
_diffrn_measurement_method        'omega scans'
_diffrn_detector_area_resol_mean  ? 
_diffrn_standards_number          ? 
_diffrn_standards_interval_count  ? 
_diffrn_standards_interval_time   ? 
_diffrn_standards_decay_%         ? 
_diffrn_reflns_number             21631 
_diffrn_reflns_av_R_equivalents   0.0399 
_diffrn_reflns_av_sigmaI/netI     0.0629 
_diffrn_reflns_limit_h_min        -14 
_diffrn_reflns_limit_h_max        14 
_diffrn_reflns_limit_k_min        -14 
_diffrn_reflns_limit_k_max        14 
_diffrn_reflns_limit_l_min        -24 
_diffrn_reflns_limit_l_max        24 
_diffrn_reflns_theta_min          2.07 
_diffrn_reflns_theta_max          29.00 
_reflns_number_total              9461 
_reflns_number_gt                 6661 
_reflns_threshold_expression      'I>2\s(I)'
 
_computing_data_collection        'Bruker APEX II'
_computing_cell_refinement        'Bruker SAINT'
_computing_data_reduction         'Bruker SAINT'
_computing_structure_solution     'SHELXS-97 (Sheldrick, 1997)'
_computing_structure_refinement   'SHELXL-97 (Sheldrick, 1997)'
_computing_molecular_graphics     'Bruker SHELXTL'
_computing_publication_material   'Bruker SHELXTL'
 
_refine_special_details 
; 
 Refinement of F^2^ against ALL reflections.  The weighted R-factor wR and 
 goodness of fit S are based on F^2^, conventional R-factors R are based 
 on F, with F set to zero for negative F^2^. The threshold expression of 
 F^2^ > 2sigma(F^2^) is used only for calculating R-factors(gt) etc. and is 
 not relevant to the choice of reflections for refinement.  R-factors based 
 on F^2^ are statistically about twice as large as those based on F, and R- 
 factors based on ALL data will be even larger. 
; 
 
_refine_ls_structure_factor_coef  Fsqd  
_refine_ls_matrix_type            full 
_refine_ls_weighting_scheme       calc  
_refine_ls_weighting_details 
 'calc w=1/[\s^2^(Fo^2^)+(0.0252P)^2^+0.0000P] where P=(Fo^2^+2Fc^2^)/3' 
_atom_sites_solution_primary      direct 
_atom_sites_solution_secondary    difmap 
_atom_sites_solution_hydrogens    geom 
_refine_ls_hydrogen_treatment     mixed 
_refine_ls_extinction_method      none 
_refine_ls_extinction_coef        ? 
_refine_ls_number_reflns          9461 
_refine_ls_number_parameters      439 
_refine_ls_number_restraints      0 
_refine_ls_R_factor_all           0.0680 
_refine_ls_R_factor_gt            0.0365 
_refine_ls_wR_factor_ref          0.0732 
_refine_ls_wR_factor_gt           0.0633 
_refine_ls_goodness_of_fit_ref    0.999 
_refine_ls_restrained_S_all       0.999 
_refine_ls_shift/su_max           0.002 
_refine_ls_shift/su_mean          0.000 
 
loop_ 
 _atom_site_label 
 _atom_site_type_symbol 
 _atom_site_fract_x 
 _atom_site_fract_y 
 _atom_site_fract_z 
 _atom_site_U_iso_or_equiv 
 _atom_site_adp_type 
 _atom_site_occupancy 
 _atom_site_symmetry_multiplicity 
 _atom_site_calc_flag 
 _atom_site_refinement_flags 
 _atom_site_disorder_assembly 
 _atom_site_disorder_group 
Ni1 Ni 0.02599(3) 0.82037(3) 0.10212(2) 0.01434(8) Uani 1 1 d . . . 
S1A S 0.13468(7) 0.75734(7) 0.20819(4) 0.01727(14) Uani 1 1 d . . . 
S1 S -0.08170(7) 0.87869(7) -0.00284(4) 0.01741(14) Uani 1 1 d . . . 
S2 S -0.14351(7) 0.95720(7) 0.16120(4) 0.01756(14) Uani 1 1 d . . . 
S2A S 0.18971(7) 0.68043(6) 0.04167(4) 0.01626(14) Uani 1 1 d . . . 
S3A S 0.41432(7) 0.54114(7) 0.24873(4) 0.01689(14) Uani 1 1 d . . . 
S3 S -0.36450(7) 1.07887(7) -0.04494(4) 0.01726(14) Uani 1 1 d . . . 
S4A S 0.46057(7) 0.46724(6) 0.09884(4) 0.01631(14) Uani 1 1 d . . . 
S4 S -0.42870(7) 1.14132(7) 0.10945(4) 0.01772(14) Uani 1 1 d . . . 
S5A S 0.67180(7) 0.31709(7) 0.21633(4) 0.01915(15) Uani 1 1 d . . . 
S5 S -0.63634(7) 1.28151(7) -0.01058(4) 0.02254(16) Uani 1 1 d . . . 
C1S C -0.2361(3) 0.9938(2) 0.02061(15) 0.0143(5) Uani 1 1 d . . . 
C1SA C 0.2849(3) 0.6333(2) 0.18400(15) 0.0151(5) Uani 1 1 d . . . 
C2SA C 0.3075(3) 0.5991(2) 0.11271(15) 0.0141(5) Uani 1 1 d . . . 
C2S C -0.2647(3) 1.0262(2) 0.09273(15) 0.0151(5) Uani 1 1 d . . . 
C3SA C 0.5235(3) 0.4365(2) 0.18900(15) 0.0148(5) Uani 1 1 d . . . 
C3S C -0.4847(3) 1.1728(3) 0.01659(15) 0.0163(5) Uani 1 1 d . . . 
Fe1 Fe -0.02659(4) 0.38045(4) 0.31216(2) 0.01273(8) Uani 1 1 d . . . 
O1 O 0.16298(17) 0.30454(17) 0.33558(11) 0.0182(4) Uani 1 1 d . . . 
O2 O 0.41948(18) 0.13972(18) 0.34639(11) 0.0217(4) Uani 1 1 d . . . 
O3 O -0.12273(17) 0.28884(17) 0.39730(10) 0.0162(4) Uani 1 1 d . . . 
O4 O -0.24401(18) 0.21669(17) 0.53632(10) 0.0186(4) Uani 1 1 d . . . 
N1 N -0.0413(2) 0.5383(2) 0.36574(12) 0.0148(4) Uani 1 1 d . . . 
N2 N -0.2264(2) 0.5299(2) 0.27905(12) 0.0160(5) Uani 1 1 d . . . 
H2N H -0.2766 0.4849 0.2802 0.019 Uiso 1 1 d R . . 
N3 N 0.0204(2) 0.4700(2) 0.18959(13) 0.0182(5) Uani 1 1 d . . . 
H3N H 0.063(3) 0.531(3) 0.1856(16) 0.022(8) Uiso 1 1 d . . . 
N4 N 0.0074(2) 0.2222(2) 0.25601(12) 0.0157(5) Uani 1 1 d . . . 
C1 C 0.3815(3) 0.2475(3) 0.38145(15) 0.0180(6) Uani 1 1 d . . . 
C2 C 0.2418(3) 0.3347(3) 0.37321(15) 0.0151(5) Uani 1 1 d . . . 
C3 C 0.1939(3) 0.4496(2) 0.40657(14) 0.0143(5) Uani 1 1 d . . . 
C4 C 0.2849(3) 0.4750(3) 0.44716(15) 0.0193(6) Uani 1 1 d . . . 
H4A H 0.2528 0.5525 0.4693 0.023 Uiso 1 1 calc R . . 
C5 C 0.4181(3) 0.3885(3) 0.45449(16) 0.0216(6) Uani 1 1 d . . . 
H5A H 0.4782 0.4056 0.4821 0.026 Uiso 1 1 calc R . . 
C6 C 0.4668(3) 0.2743(3) 0.42133(15) 0.0203(6) Uani 1 1 d . . . 
H6A H 0.5599 0.2150 0.4265 0.024 Uiso 1 1 calc R . . 
C7 C 0.0553(3) 0.5450(3) 0.39963(14) 0.0152(5) Uani 1 1 d . . . 
H7A H 0.0325 0.6209 0.4224 0.018 Uiso 1 1 calc R . . 
C8 C -0.1743(3) 0.6510(2) 0.36084(16) 0.0181(6) Uani 1 1 d . . . 
H8A H -0.1658 0.7297 0.3186 0.022 Uiso 1 1 calc R . . 
H8B H -0.2014 0.6799 0.4115 0.022 Uiso 1 1 calc R . . 
C9 C -0.2835(3) 0.6028(3) 0.34295(15) 0.0187(6) Uani 1 1 d . . . 
H9A H -0.3099 0.5416 0.3908 0.022 Uiso 1 1 calc R . . 
H9B H -0.3672 0.6818 0.3267 0.022 Uiso 1 1 calc R . . 
C10 C -0.2172(3) 0.6198(3) 0.19975(15) 0.0220(6) Uani 1 1 d . . . 
H10A H -0.1923 0.6973 0.2040 0.026 Uiso 1 1 calc R . . 
H10B H -0.3077 0.6564 0.1766 0.026 Uiso 1 1 calc R . . 
C11 C -0.1081(3) 0.5379(3) 0.14783(15) 0.0213(6) Uani 1 1 d . . . 
H11A H -0.1394 0.4692 0.1369 0.026 Uiso 1 1 calc R . . 
H11B H -0.0909 0.5984 0.0970 0.026 Uiso 1 1 calc R . . 
C12 C 0.1230(3) 0.3587(3) 0.15533(17) 0.0260(7) Uani 1 1 d . . . 
H12A H 0.2131 0.3294 0.1780 0.031 Uiso 1 1 calc R . . 
H12B H 0.1368 0.3910 0.0975 0.031 Uiso 1 1 calc R . . 
C13 C 0.0691(3) 0.2397(3) 0.17415(16) 0.0241(6) Uani 1 1 d . . . 
H13A H -0.0012 0.2579 0.1375 0.029 Uiso 1 1 calc R . . 
H13B H 0.1461 0.1556 0.1676 0.029 Uiso 1 1 calc R . . 
C14 C -0.0107(3) 0.1076(3) 0.28915(15) 0.0157(5) Uani 1 1 d . . . 
H14A H 0.0204 0.0401 0.2591 0.019 Uiso 1 1 calc R . . 
C15 C -0.1899(3) 0.1194(2) 0.49269(15) 0.0147(5) Uani 1 1 d . . . 
C16 C -0.1276(2) 0.1642(2) 0.41732(15) 0.0131(5) Uani 1 1 d . . . 
C17 C -0.0735(2) 0.0722(2) 0.36741(15) 0.0140(5) Uani 1 1 d . . . 
C18 C -0.0789(3) -0.0614(3) 0.39396(16) 0.0180(6) Uani 1 1 d . . . 
H18A H -0.0424 -0.1230 0.3601 0.022 Uiso 1 1 calc R . . 
C19 C -0.1356(3) -0.1024(3) 0.46716(16) 0.0195(6) Uani 1 1 d . . . 
H19A H -0.1369 -0.1928 0.4846 0.023 Uiso 1 1 calc R . . 
C20 C -0.1926(3) -0.0116(2) 0.51758(15) 0.0167(5) Uani 1 1 d . . . 
H20A H -0.2327 -0.0407 0.5687 0.020 Uiso 1 1 calc R . . 
C21 C 0.5563(3) 0.0443(3) 0.35635(19) 0.0287(7) Uani 1 1 d . . . 
H21A H 0.5737 -0.0239 0.3258 0.043 Uiso 1 1 calc R . . 
H21B H 0.5658 -0.0007 0.4123 0.043 Uiso 1 1 calc R . . 
H21C H 0.6234 0.0921 0.3378 0.043 Uiso 1 1 calc R . . 
C22 C -0.3101(3) 0.1782(3) 0.61193(15) 0.0250(6) Uani 1 1 d . . . 
H22A H -0.3456 0.2554 0.6372 0.037 Uiso 1 1 calc R . . 
H22B H -0.2431 0.1018 0.6447 0.037 Uiso 1 1 calc R . . 
H22C H -0.3870 0.1509 0.6059 0.037 Uiso 1 1 calc R . . 
 
loop_ 
 _atom_site_aniso_label 
 _atom_site_aniso_U_11 
 _atom_site_aniso_U_22 
 _atom_site_aniso_U_33 
 _atom_site_aniso_U_23 
 _atom_site_aniso_U_13 
 _atom_site_aniso_U_12 
Ni1 0.01352(17) 0.01337(17) 0.01528(17) -0.00438(13) -0.00196(13) -0.00242(14) 
S1A 0.0158(3) 0.0176(3) 0.0160(3) -0.0062(3) -0.0022(3) -0.0008(3) 
S1 0.0159(3) 0.0185(3) 0.0170(3) -0.0073(3) -0.0026(3) -0.0020(3) 
S2 0.0166(3) 0.0177(3) 0.0167(3) -0.0064(3) -0.0044(3) -0.0008(3) 
S2A 0.0156(3) 0.0161(3) 0.0153(3) -0.0047(3) -0.0033(3) -0.0016(3) 
S3A 0.0158(3) 0.0178(3) 0.0158(3) -0.0052(3) -0.0035(3) -0.0022(3) 
S3 0.0154(3) 0.0193(3) 0.0174(3) -0.0062(3) -0.0036(3) -0.0037(3) 
S4A 0.0155(3) 0.0156(3) 0.0158(3) -0.0053(3) -0.0023(2) -0.0014(3) 
S4 0.0157(3) 0.0174(3) 0.0178(3) -0.0061(3) -0.0025(3) -0.0010(3) 
S5A 0.0145(3) 0.0182(3) 0.0240(4) -0.0054(3) -0.0055(3) -0.0025(3) 
S5 0.0154(3) 0.0241(4) 0.0249(4) -0.0066(3) -0.0065(3) -0.0001(3) 
C1S 0.0135(13) 0.0108(12) 0.0185(14) -0.0018(10) -0.0035(10) -0.0040(10) 
C1SA 0.0145(13) 0.0130(12) 0.0163(13) -0.0018(10) -0.0008(10) -0.0041(11) 
C2SA 0.0135(13) 0.0109(12) 0.0163(13) -0.0029(10) -0.0003(10) -0.0027(10) 
C2S 0.0143(13) 0.0110(12) 0.0191(14) -0.0026(10) -0.0027(10) -0.0031(11) 
C3SA 0.0150(13) 0.0138(12) 0.0170(13) -0.0033(10) 0.0001(10) -0.0074(11) 
C3S 0.0178(13) 0.0149(13) 0.0167(13) -0.0025(11) -0.0014(11) -0.0067(11) 
Fe1 0.01267(18) 0.01254(18) 0.01462(19) -0.00538(15) -0.00072(14) -0.00464(15) 
O1 0.0144(9) 0.0171(9) 0.0260(11) -0.0091(8) -0.0044(8) -0.0043(8) 
O2 0.0144(10) 0.0167(10) 0.0333(12) -0.0099(8) -0.0029(8) -0.0009(8) 
O3 0.0186(10) 0.0135(9) 0.0167(9) -0.0055(7) 0.0019(7) -0.0057(8) 
O4 0.0210(10) 0.0165(9) 0.0173(10) -0.0066(8) 0.0060(8) -0.0064(8) 
N1 0.0158(11) 0.0122(11) 0.0154(11) -0.0022(9) -0.0004(9) -0.0044(9) 
N2 0.0166(11) 0.0162(11) 0.0164(11) -0.0026(9) -0.0037(9) -0.0069(10) 
N3 0.0181(12) 0.0178(12) 0.0200(12) -0.0050(10) 0.0015(9) -0.0085(10) 
N4 0.0168(11) 0.0171(11) 0.0138(11) -0.0054(9) 0.0010(9) -0.0062(10) 
C1 0.0188(14) 0.0145(13) 0.0188(14) -0.0011(11) -0.0008(11) -0.0056(11) 
C2 0.0151(13) 0.0159(13) 0.0144(13) -0.0006(10) -0.0004(10) -0.0076(11) 
C3 0.0161(13) 0.0152(13) 0.0116(12) -0.0013(10) -0.0016(10) -0.0062(11) 
C4 0.0240(15) 0.0214(14) 0.0166(14) -0.0047(11) -0.0033(11) -0.0114(12) 
C5 0.0202(15) 0.0288(16) 0.0192(15) -0.0042(12) -0.0059(11) -0.0111(13) 
C6 0.0164(14) 0.0203(14) 0.0209(15) -0.0012(12) -0.0043(11) -0.0038(12) 
C7 0.0191(13) 0.0137(12) 0.0130(13) -0.0053(10) 0.0016(10) -0.0053(11) 
C8 0.0197(14) 0.0137(13) 0.0184(14) -0.0041(11) -0.0030(11) -0.0020(11) 
C9 0.0136(13) 0.0204(14) 0.0194(14) -0.0065(11) -0.0007(11) -0.0016(11) 
C10 0.0244(15) 0.0198(14) 0.0194(15) 0.0006(11) -0.0061(12) -0.0064(12) 
C11 0.0270(15) 0.0248(15) 0.0143(14) -0.0009(11) -0.0014(11) -0.0139(13) 
C12 0.0264(16) 0.0292(16) 0.0218(15) -0.0097(13) 0.0099(12) -0.0112(14) 
C13 0.0315(16) 0.0246(15) 0.0170(14) -0.0098(12) 0.0060(12) -0.0101(13) 
C14 0.0142(13) 0.0167(13) 0.0182(14) -0.0096(11) -0.0031(10) -0.0026(11) 
C15 0.0123(12) 0.0146(13) 0.0173(13) -0.0063(11) -0.0009(10) -0.0028(11) 
C16 0.0100(12) 0.0119(12) 0.0178(13) -0.0038(10) -0.0040(10) -0.0024(10) 
C17 0.0117(12) 0.0157(13) 0.0171(13) -0.0068(10) -0.0026(10) -0.0047(11) 
C18 0.0201(14) 0.0141(13) 0.0213(14) -0.0070(11) -0.0072(11) -0.0029(11) 
C19 0.0244(15) 0.0130(13) 0.0224(15) -0.0022(11) -0.0036(11) -0.0083(12) 
C20 0.0148(13) 0.0177(13) 0.0170(13) -0.0027(11) -0.0009(10) -0.0059(11) 
C21 0.0162(15) 0.0178(15) 0.048(2) -0.0085(14) -0.0025(13) -0.0003(12) 
C22 0.0280(16) 0.0248(15) 0.0194(15) -0.0086(12) 0.0069(12) -0.0069(13) 
 
_geom_special_details 
; 
 All esds (except the esd in the dihedral angle between two l.s. planes) 
 are estimated using the full covariance matrix.  The cell esds are taken 
 into account individually in the estimation of esds in distances, angles 
 and torsion angles; correlations between esds in cell parameters are only 
 used when they are defined by crystal symmetry.  An approximate (isotropic) 
 treatment of cell esds is used for estimating esds involving l.s. planes. 
; 
 
loop_ 
 _geom_bond_atom_site_label_1 
 _geom_bond_atom_site_label_2 
 _geom_bond_distance 
 _geom_bond_site_symmetry_2 
 _geom_bond_publ_flag 
Ni1 S1 2.1536(8) . ? 
Ni1 S1A 2.1701(8) . ? 
Ni1 S2 2.1702(7) . ? 
Ni1 S2A 2.1732(7) . ? 
S1A C1SA 1.728(3) . ? 
S1 C1S 1.704(3) . ? 
S2 C2S 1.716(3) . ? 
S2A C2SA 1.726(3) . ? 
S3A C3SA 1.731(2) . ? 
S3A C1SA 1.742(3) . ? 
S3 C3S 1.731(3) . ? 
S3 C1S 1.737(3) . ? 
S4A C3SA 1.726(3) . ? 
S4A C2SA 1.742(2) . ? 
S4 C3S 1.738(3) . ? 
S4 C2S 1.741(3) . ? 
S5A C3SA 1.655(3) . ? 
S5 C3S 1.642(3) . ? 
C1S C2S 1.369(3) . ? 
C1SA C2SA 1.367(3) . ? 
Fe1 O1 1.9093(17) . ? 
Fe1 O3 1.9126(17) . ? 
Fe1 N4 2.103(2) . ? 
Fe1 N1 2.120(2) . ? 
Fe1 N3 2.171(2) . ? 
Fe1 N2 2.173(2) . ? 
O1 C2 1.313(3) . ? 
O2 C1 1.372(3) . ? 
O2 C21 1.427(3) . ? 
O3 C16 1.319(3) . ? 
O4 C15 1.373(3) . ? 
O4 C22 1.424(3) . ? 
N1 C7 1.287(3) . ? 
N1 C8 1.471(3) . ? 
N2 C9 1.472(3) . ? 
N2 C10 1.484(3) . ? 
N2 H2N 0.8311 . ? 
N3 C11 1.480(3) . ? 
N3 C12 1.483(3) . ? 
N3 H3N 0.90(3) . ? 
N4 C14 1.291(3) . ? 
N4 C13 1.471(3) . ? 
C1 C6 1.373(3) . ? 
C1 C2 1.421(4) . ? 
C2 C3 1.413(3) . ? 
C3 C4 1.420(3) . ? 
C3 C7 1.437(3) . ? 
C4 C5 1.365(4) . ? 
C4 H4A 0.9500 . ? 
C5 C6 1.403(4) . ? 
C5 H5A 0.9500 . ? 
C6 H6A 0.9500 . ? 
C7 H7A 0.9500 . ? 
C8 C9 1.521(3) . ? 
C8 H8A 0.9900 . ? 
C8 H8B 0.9900 . ? 
C9 H9A 0.9900 . ? 
C9 H9B 0.9900 . ? 
C10 C11 1.508(4) . ? 
C10 H10A 0.9900 . ? 
C10 H10B 0.9900 . ? 
C11 H11A 0.9900 . ? 
C11 H11B 0.9900 . ? 
C12 C13 1.526(4) . ? 
C12 H12A 0.9900 . ? 
C12 H12B 0.9900 . ? 
C13 H13A 0.9900 . ? 
C13 H13B 0.9900 . ? 
C14 C17 1.440(3) . ? 
C14 H14A 0.9500 . ? 
C15 C20 1.378(3) . ? 
C15 C16 1.420(3) . ? 
C16 C17 1.412(3) . ? 
C17 C18 1.416(3) . ? 
C18 C19 1.356(4) . ? 
C18 H18A 0.9500 . ? 
C19 C20 1.410(3) . ? 
C19 H19A 0.9500 . ? 
C20 H20A 0.9500 . ? 
C21 H21A 0.9800 . ? 
C21 H21B 0.9800 . ? 
C21 H21C 0.9800 . ? 
C22 H22A 0.9800 . ? 
C22 H22B 0.9800 . ? 
C22 H22C 0.9800 . ? 
 
loop_ 
 _geom_angle_atom_site_label_1 
 _geom_angle_atom_site_label_2 
 _geom_angle_atom_site_label_3 
 _geom_angle 
 _geom_angle_site_symmetry_1 
 _geom_angle_site_symmetry_3 
 _geom_angle_publ_flag 
S1 Ni1 S1A 178.83(3) . . ? 
S1 Ni1 S2 93.06(3) . . ? 
S1A Ni1 S2 87.52(3) . . ? 
S1 Ni1 S2A 85.38(3) . . ? 
S1A Ni1 S2A 94.01(3) . . ? 
S2 Ni1 S2A 177.67(3) . . ? 
C1SA S1A Ni1 101.49(9) . . ? 
C1S S1 Ni1 102.68(9) . . ? 
C2S S2 Ni1 101.89(9) . . ? 
C2SA S2A Ni1 101.30(8) . . ? 
C3SA S3A C1SA 97.58(12) . . ? 
C3S S3 C1S 97.35(12) . . ? 
C3SA S4A C2SA 97.60(12) . . ? 
C3S S4 C2S 97.05(12) . . ? 
C2S C1S S1 121.2(2) . . ? 
C2S C1S S3 116.11(19) . . ? 
S1 C1S S3 122.69(15) . . ? 
C2SA C1SA S1A 121.4(2) . . ? 
C2SA C1SA S3A 115.77(19) . . ? 
S1A C1SA S3A 122.80(15) . . ? 
C1SA C2SA S2A 121.76(19) . . ? 
C1SA C2SA S4A 115.90(19) . . ? 
S2A C2SA S4A 122.34(14) . . ? 
C1S C2S S2 121.09(19) . . ? 
C1S C2S S4 116.04(19) . . ? 
S2 C2S S4 122.87(15) . . ? 
S5A C3SA S4A 123.48(15) . . ? 
S5A C3SA S3A 123.37(15) . . ? 
S4A C3SA S3A 113.15(14) . . ? 
S5 C3S S3 123.15(15) . . ? 
S5 C3S S4 123.48(15) . . ? 
S3 C3S S4 113.37(14) . . ? 
O1 Fe1 O3 105.41(8) . . ? 
O1 Fe1 N4 88.92(8) . . ? 
O3 Fe1 N4 87.34(8) . . ? 
O1 Fe1 N1 86.45(8) . . ? 
O3 Fe1 N1 96.43(7) . . ? 
N4 Fe1 N1 174.67(8) . . ? 
O1 Fe1 N3 93.70(8) . . ? 
O3 Fe1 N3 155.23(8) . . ? 
N4 Fe1 N3 77.24(8) . . ? 
N1 Fe1 N3 100.42(8) . . ? 
O1 Fe1 N2 160.47(8) . . ? 
O3 Fe1 N2 87.96(8) . . ? 
N4 Fe1 N2 106.17(8) . . ? 
N1 Fe1 N2 77.81(8) . . ? 
N3 Fe1 N2 78.07(8) . . ? 
C2 O1 Fe1 135.31(16) . . ? 
C1 O2 C21 116.9(2) . . ? 
C16 O3 Fe1 132.96(16) . . ? 
C15 O4 C22 116.6(2) . . ? 
C7 N1 C8 118.4(2) . . ? 
C7 N1 Fe1 126.13(17) . . ? 
C8 N1 Fe1 115.50(16) . . ? 
C9 N2 C10 114.2(2) . . ? 
C9 N2 Fe1 107.03(15) . . ? 
C10 N2 Fe1 112.27(16) . . ? 
C9 N2 H2N 106.4 . . ? 
C10 N2 H2N 111.1 . . ? 
Fe1 N2 H2N 105.3 . . ? 
C11 N3 C12 113.3(2) . . ? 
C11 N3 Fe1 110.26(16) . . ? 
C12 N3 Fe1 106.88(16) . . ? 
C11 N3 H3N 109.2(17) . . ? 
C12 N3 H3N 105.9(17) . . ? 
Fe1 N3 H3N 111.3(17) . . ? 
C14 N4 C13 117.6(2) . . ? 
C14 N4 Fe1 125.53(17) . . ? 
C13 N4 Fe1 116.62(16) . . ? 
O2 C1 C6 125.1(2) . . ? 
O2 C1 C2 114.3(2) . . ? 
C6 C1 C2 120.5(2) . . ? 
O1 C2 C3 123.0(2) . . ? 
O1 C2 C1 118.7(2) . . ? 
C3 C2 C1 118.3(2) . . ? 
C2 C3 C4 119.8(2) . . ? 
C2 C3 C7 122.1(2) . . ? 
C4 C3 C7 118.0(2) . . ? 
C5 C4 C3 120.3(2) . . ? 
C5 C4 H4A 119.8 . . ? 
C3 C4 H4A 119.8 . . ? 
C4 C5 C6 120.3(2) . . ? 
C4 C5 H5A 119.9 . . ? 
C6 C5 H5A 119.9 . . ? 
C1 C6 C5 120.7(2) . . ? 
C1 C6 H6A 119.6 . . ? 
C5 C6 H6A 119.6 . . ? 
N1 C7 C3 126.8(2) . . ? 
N1 C7 H7A 116.6 . . ? 
C3 C7 H7A 116.6 . . ? 
N1 C8 C9 108.7(2) . . ? 
N1 C8 H8A 110.0 . . ? 
C9 C8 H8A 110.0 . . ? 
N1 C8 H8B 110.0 . . ? 
C9 C8 H8B 110.0 . . ? 
H8A C8 H8B 108.3 . . ? 
N2 C9 C8 108.9(2) . . ? 
N2 C9 H9A 109.9 . . ? 
C8 C9 H9A 109.9 . . ? 
N2 C9 H9B 109.9 . . ? 
C8 C9 H9B 109.9 . . ? 
H9A C9 H9B 108.3 . . ? 
N2 C10 C11 108.6(2) . . ? 
N2 C10 H10A 110.0 . . ? 
C11 C10 H10A 110.0 . . ? 
N2 C10 H10B 110.0 . . ? 
C11 C10 H10B 110.0 . . ? 
H10A C10 H10B 108.4 . . ? 
N3 C11 C10 108.2(2) . . ? 
N3 C11 H11A 110.1 . . ? 
C10 C11 H11A 110.1 . . ? 
N3 C11 H11B 110.1 . . ? 
C10 C11 H11B 110.1 . . ? 
H11A C11 H11B 108.4 . . ? 
N3 C12 C13 108.6(2) . . ? 
N3 C12 H12A 110.0 . . ? 
C13 C12 H12A 110.0 . . ? 
N3 C12 H12B 110.0 . . ? 
C13 C12 H12B 110.0 . . ? 
H12A C12 H12B 108.4 . . ? 
N4 C13 C12 109.0(2) . . ? 
N4 C13 H13A 109.9 . . ? 
C12 C13 H13A 109.9 . . ? 
N4 C13 H13B 109.9 . . ? 
C12 C13 H13B 109.9 . . ? 
H13A C13 H13B 108.3 . . ? 
N4 C14 C17 126.2(2) . . ? 
N4 C14 H14A 116.9 . . ? 
C17 C14 H14A 116.9 . . ? 
O4 C15 C20 124.9(2) . . ? 
O4 C15 C16 114.1(2) . . ? 
C20 C15 C16 121.0(2) . . ? 
O3 C16 C17 123.2(2) . . ? 
O3 C16 C15 118.9(2) . . ? 
C17 C16 C15 117.9(2) . . ? 
C16 C17 C18 120.0(2) . . ? 
C16 C17 C14 122.7(2) . . ? 
C18 C17 C14 117.3(2) . . ? 
C19 C18 C17 120.7(2) . . ? 
C19 C18 H18A 119.7 . . ? 
C17 C18 H18A 119.7 . . ? 
C18 C19 C20 120.4(2) . . ? 
C18 C19 H19A 119.8 . . ? 
C20 C19 H19A 119.8 . . ? 
C15 C20 C19 119.9(2) . . ? 
C15 C20 H20A 120.0 . . ? 
C19 C20 H20A 120.0 . . ? 
O2 C21 H21A 109.5 . . ? 
O2 C21 H21B 109.5 . . ? 
H21A C21 H21B 109.5 . . ? 
O2 C21 H21C 109.5 . . ? 
H21A C21 H21C 109.5 . . ? 
H21B C21 H21C 109.5 . . ? 
O4 C22 H22A 109.5 . . ? 
O4 C22 H22B 109.5 . . ? 
H22A C22 H22B 109.5 . . ? 
O4 C22 H22C 109.5 . . ? 
H22A C22 H22C 109.5 . . ? 
H22B C22 H22C 109.5 . . ? 
 
loop_ 
 _geom_torsion_atom_site_label_1 
 _geom_torsion_atom_site_label_2 
 _geom_torsion_atom_site_label_3 
 _geom_torsion_atom_site_label_4 
 _geom_torsion 
 _geom_torsion_site_symmetry_1 
 _geom_torsion_site_symmetry_2 
 _geom_torsion_site_symmetry_3 
 _geom_torsion_site_symmetry_4 
 _geom_torsion_publ_flag 
S1 Ni1 S1A C1SA 58.1(16) . . . . ? 
S2 Ni1 S1A C1SA 177.62(9) . . . . ? 
S2A Ni1 S1A C1SA -0.62(9) . . . . ? 
S1A Ni1 S1 C1S 118.4(15) . . . . ? 
S2 Ni1 S1 C1S -1.08(9) . . . . ? 
S2A Ni1 S1 C1S 177.19(9) . . . . ? 
S1 Ni1 S2 C2S 2.07(9) . . . . ? 
S1A Ni1 S2 C2S -176.90(9) . . . . ? 
S2A Ni1 S2 C2S -45.8(8) . . . . ? 
S1 Ni1 S2A C2SA -177.74(9) . . . . ? 
S1A Ni1 S2A C2SA 1.25(9) . . . . ? 
S2 Ni1 S2A C2SA -129.7(8) . . . . ? 
Ni1 S1 C1S C2S -0.6(2) . . . . ? 
Ni1 S1 C1S S3 178.28(13) . . . . ? 
C3S S3 C1S C2S -1.5(2) . . . . ? 
C3S S3 C1S S1 179.62(16) . . . . ? 
Ni1 S1A C1SA C2SA -0.4(2) . . . . ? 
Ni1 S1A C1SA S3A -178.66(13) . . . . ? 
C3SA S3A C1SA C2SA -0.5(2) . . . . ? 
C3SA S3A C1SA S1A 177.81(16) . . . . ? 
S1A C1SA C2SA S2A 1.7(3) . . . . ? 
S3A C1SA C2SA S2A -179.95(13) . . . . ? 
S1A C1SA C2SA S4A -177.39(13) . . . . ? 
S3A C1SA C2SA S4A 1.0(3) . . . . ? 
Ni1 S2A C2SA C1SA -1.9(2) . . . . ? 
Ni1 S2A C2SA S4A 177.11(13) . . . . ? 
C3SA S4A C2SA C1SA -0.9(2) . . . . ? 
C3SA S4A C2SA S2A -179.98(16) . . . . ? 
S1 C1S C2S S2 2.6(3) . . . . ? 
S3 C1S C2S S2 -176.29(13) . . . . ? 
S1 C1S C2S S4 -178.00(13) . . . . ? 
S3 C1S C2S S4 3.1(3) . . . . ? 
Ni1 S2 C2S C1S -3.1(2) . . . . ? 
Ni1 S2 C2S S4 177.58(13) . . . . ? 
C3S S4 C2S C1S -3.0(2) . . . . ? 
C3S S4 C2S S2 176.34(16) . . . . ? 
C2SA S4A C3SA S5A 179.38(16) . . . . ? 
C2SA S4A C3SA S3A 0.51(16) . . . . ? 
C1SA S3A C3SA S5A -178.98(16) . . . . ? 
C1SA S3A C3SA S4A -0.10(16) . . . . ? 
C1S S3 C3S S5 179.01(17) . . . . ? 
C1S S3 C3S S4 -0.61(16) . . . . ? 
C2S S4 C3S S5 -177.69(17) . . . . ? 
C2S S4 C3S S3 1.92(16) . . . . ? 
O3 Fe1 O1 C2 -91.5(2) . . . . ? 
N4 Fe1 O1 C2 -178.4(2) . . . . ? 
N1 Fe1 O1 C2 4.2(2) . . . . ? 
N3 Fe1 O1 C2 104.5(2) . . . . ? 
N2 Fe1 O1 C2 40.4(4) . . . . ? 
O1 Fe1 O3 C16 -72.5(2) . . . . ? 
N4 Fe1 O3 C16 15.7(2) . . . . ? 
N1 Fe1 O3 C16 -160.5(2) . . . . ? 
N3 Fe1 O3 C16 66.7(3) . . . . ? 
N2 Fe1 O3 C16 122.0(2) . . . . ? 
O1 Fe1 N1 C7 -3.8(2) . . . . ? 
O3 Fe1 N1 C7 101.3(2) . . . . ? 
N4 Fe1 N1 C7 -33.5(10) . . . . ? 
N3 Fe1 N1 C7 -96.9(2) . . . . ? 
N2 Fe1 N1 C7 -172.2(2) . . . . ? 
O1 Fe1 N1 C8 174.43(18) . . . . ? 
O3 Fe1 N1 C8 -80.44(17) . . . . ? 
N4 Fe1 N1 C8 144.7(8) . . . . ? 
N3 Fe1 N1 C8 81.31(17) . . . . ? 
N2 Fe1 N1 C8 6.07(17) . . . . ? 
O1 Fe1 N2 C9 -67.7(3) . . . . ? 
O3 Fe1 N2 C9 66.37(16) . . . . ? 
N4 Fe1 N2 C9 153.02(15) . . . . ? 
N1 Fe1 N2 C9 -30.65(16) . . . . ? 
N3 Fe1 N2 C9 -134.22(17) . . . . ? 
O1 Fe1 N2 C10 58.3(3) . . . . ? 
O3 Fe1 N2 C10 -167.62(17) . . . . ? 
N4 Fe1 N2 C10 -80.98(17) . . . . ? 
N1 Fe1 N2 C10 95.35(17) . . . . ? 
N3 Fe1 N2 C10 -8.22(16) . . . . ? 
O1 Fe1 N3 C11 177.70(16) . . . . ? 
O3 Fe1 N3 C11 36.8(3) . . . . ? 
N4 Fe1 N3 C11 89.66(17) . . . . ? 
N1 Fe1 N3 C11 -95.23(17) . . . . ? 
N2 Fe1 N3 C11 -20.20(16) . . . . ? 
O1 Fe1 N3 C12 54.15(17) . . . . ? 
O3 Fe1 N3 C12 -86.7(2) . . . . ? 
N4 Fe1 N3 C12 -33.89(16) . . . . ? 
N1 Fe1 N3 C12 141.22(16) . . . . ? 
N2 Fe1 N3 C12 -143.75(18) . . . . ? 
O1 Fe1 N4 C14 91.9(2) . . . . ? 
O3 Fe1 N4 C14 -13.6(2) . . . . ? 
N1 Fe1 N4 C14 121.5(8) . . . . ? 
N3 Fe1 N4 C14 -174.1(2) . . . . ? 
N2 Fe1 N4 C14 -100.7(2) . . . . ? 
O1 Fe1 N4 C13 -82.16(19) . . . . ? 
O3 Fe1 N4 C13 172.35(19) . . . . ? 
N1 Fe1 N4 C13 -52.5(10) . . . . ? 
N3 Fe1 N4 C13 11.88(18) . . . . ? 
N2 Fe1 N4 C13 85.24(19) . . . . ? 
C21 O2 C1 C6 3.8(4) . . . . ? 
C21 O2 C1 C2 -176.7(2) . . . . ? 
Fe1 O1 C2 C3 -2.3(4) . . . . ? 
Fe1 O1 C2 C1 177.20(18) . . . . ? 
O2 C1 C2 O1 1.3(3) . . . . ? 
C6 C1 C2 O1 -179.1(2) . . . . ? 
O2 C1 C2 C3 -179.2(2) . . . . ? 
C6 C1 C2 C3 0.4(4) . . . . ? 
O1 C2 C3 C4 179.3(2) . . . . ? 
C1 C2 C3 C4 -0.1(4) . . . . ? 
O1 C2 C3 C7 -1.9(4) . . . . ? 
C1 C2 C3 C7 178.6(2) . . . . ? 
C2 C3 C4 C5 -0.4(4) . . . . ? 
C7 C3 C4 C5 -179.1(2) . . . . ? 
C3 C4 C5 C6 0.6(4) . . . . ? 
O2 C1 C6 C5 179.3(2) . . . . ? 
C2 C1 C6 C5 -0.2(4) . . . . ? 
C4 C5 C6 C1 -0.3(4) . . . . ? 
C8 N1 C7 C3 -176.4(2) . . . . ? 
Fe1 N1 C7 C3 1.8(4) . . . . ? 
C2 C3 C7 N1 1.9(4) . . . . ? 
C4 C3 C7 N1 -179.4(2) . . . . ? 
C7 N1 C8 C9 -162.5(2) . . . . ? 
Fe1 N1 C8 C9 19.1(3) . . . . ? 
C10 N2 C9 C8 -74.5(3) . . . . ? 
Fe1 N2 C9 C8 50.4(2) . . . . ? 
N1 C8 C9 N2 -45.9(3) . . . . ? 
C9 N2 C10 C11 156.6(2) . . . . ? 
Fe1 N2 C10 C11 34.6(2) . . . . ? 
C12 N3 C11 C10 164.7(2) . . . . ? 
Fe1 N3 C11 C10 44.9(2) . . . . ? 
N2 C10 C11 N3 -52.0(3) . . . . ? 
C11 N3 C12 C13 -71.0(3) . . . . ? 
Fe1 N3 C12 C13 50.7(2) . . . . ? 
C14 N4 C13 C12 -162.3(2) . . . . ? 
Fe1 N4 C13 C12 12.2(3) . . . . ? 
N3 C12 C13 N4 -41.4(3) . . . . ? 
C13 N4 C14 C17 -177.7(2) . . . . ? 
Fe1 N4 C14 C17 8.3(4) . . . . ? 
C22 O4 C15 C20 -1.6(4) . . . . ? 
C22 O4 C15 C16 178.9(2) . . . . ? 
Fe1 O3 C16 C17 -11.3(4) . . . . ? 
Fe1 O3 C16 C15 168.61(17) . . . . ? 
O4 C15 C16 O3 2.2(3) . . . . ? 
C20 C15 C16 O3 -177.3(2) . . . . ? 
O4 C15 C16 C17 -177.9(2) . . . . ? 
C20 C15 C16 C17 2.6(4) . . . . ? 
O3 C16 C17 C18 178.1(2) . . . . ? 
C15 C16 C17 C18 -1.8(3) . . . . ? 
O3 C16 C17 C14 -1.4(4) . . . . ? 
C15 C16 C17 C14 178.7(2) . . . . ? 
N4 C14 C17 C16 1.9(4) . . . . ? 
N4 C14 C17 C18 -177.6(2) . . . . ? 
C16 C17 C18 C19 0.0(4) . . . . ? 
C14 C17 C18 C19 179.5(2) . . . . ? 
C17 C18 C19 C20 1.2(4) . . . . ? 
O4 C15 C20 C19 179.0(2) . . . . ? 
C16 C15 C20 C19 -1.5(4) . . . . ? 
C18 C19 C20 C15 -0.4(4) . . . . ? 
 
_diffrn_measured_fraction_theta_max    0.999 
_diffrn_reflns_theta_full              29.00 
_diffrn_measured_fraction_theta_full   0.999 
_refine_diff_density_max    0.461 
_refine_diff_density_min   -0.394 
_refine_diff_density_rms    0.092 

loop_                                                                           
 _geom_hbond_atom_site_label_D                                                  
 _geom_hbond_atom_site_label_H                                                  
 _geom_hbond_atom_site_label_A                                                  
 _geom_hbond_site_symmetry_A                                                    
 _geom_hbond_distance_DH                                                        
 _geom_hbond_distance_HA                                                        
 _geom_hbond_distance_DA                                                        
 _geom_hbond_angle_DHA  
 _geom_hbond_publ_flag                                 
N2    H2N    S5A    1_455    0.83       2.63   3.358(2)        147  ?

_publ_section_references 
;
Bruker, Programs APEX II, version 2.0-1; SAINT, version 7.23A;
SADABS, version 2004/1; XPREP, version 2005/2;
SHELXTL, version 6.1. Bruker AXS Inc., Madison, WI, USA, 2005.

G.M. Sheldrick, Programs SHELXS97 (crystal structure solution)
and SHELXL97 (crystal structure refinement), University  of
Gottingen, Germany, 1997.
;
