# Supplementary material for: Magnetism, Conductivity and Spin-Spin Interactions in Layered Hybrid Structure of Anionic Radicals [Ni(dmit)2] Alternated by Iron(III) Spin-Crossover Complex [Fe(III)(3-OMe-Sal2trien)] and Ferric Moiety Precursors
Source: Molecules. 2020 Oct 24;25(21):4922. doi: 10.3390/molecules25214922 (PMC7663777; doi:10.3390/molecules25214922)
Supplement: Supplementary file 1 [file molecules-25-04922-s001.zip › 2_120K.cif]

 
data_2-120K 
 
_audit_creation_method            SHELXL-97 
_chemical_name_systematic 
; 
 ? 
; 
_chemical_name_common             ? 
_chemical_melting_point           ? 
_chemical_formula_moiety
 'C22 H28 Fe N4 O4, N O3, H2 O'
_chemical_formula_sum 
 'C22 H30 Fe N5 O8' 
_chemical_formula_weight          548.36 
 
loop_ 
 _atom_type_symbol 
 _atom_type_description 
 _atom_type_scat_dispersion_real 
 _atom_type_scat_dispersion_imag 
 _atom_type_scat_source 
 'C'  'C'   0.0033   0.0016 
 'International Tables Vol C Tables 4.2.6.8 and 6.1.1.4' 
 'H'  'H'   0.0000   0.0000 
 'International Tables Vol C Tables 4.2.6.8 and 6.1.1.4' 
 'N'  'N'   0.0061   0.0033 
 'International Tables Vol C Tables 4.2.6.8 and 6.1.1.4' 
 'O'  'O'   0.0106   0.0060 
 'International Tables Vol C Tables 4.2.6.8 and 6.1.1.4' 
 'Fe'  'Fe'   0.3463   0.8444 
 'International Tables Vol C Tables 4.2.6.8 and 6.1.1.4' 
 
_symmetry_cell_setting            Monoclinic
_symmetry_space_group_name_H-M    'P 21/c'
_symmetry_space_group_name_Hall   '-P 2ybc'
 
loop_ 
 _symmetry_equiv_pos_as_xyz 
 'x, y, z' 
 '-x, y+1/2, -z+1/2' 
 '-x, -y, -z' 
 'x, -y-1/2, z-1/2' 
 
_cell_length_a                    17.7659(8) 
_cell_length_b                    9.5962(4) 
_cell_length_c                    14.4516(7) 
_cell_angle_alpha                 90.00 
_cell_angle_beta                  110.4950(10) 
_cell_angle_gamma                 90.00 
_cell_volume                      2307.83(18) 
_cell_formula_units_Z             4 
_cell_measurement_temperature     120(2) 
_cell_measurement_reflns_used     676
_cell_measurement_theta_min       3
_cell_measurement_theta_max       29
 
_exptl_crystal_description        prism 
_exptl_crystal_colour             black
_exptl_crystal_size_max           0.29 
_exptl_crystal_size_mid           0.26 
_exptl_crystal_size_min           0.13 
_exptl_crystal_density_meas       ? 
_exptl_crystal_density_diffrn     1.578 
_exptl_crystal_density_method     'not measured' 
_exptl_crystal_F_000              1148 
_exptl_absorpt_coefficient_mu     0.714 
_exptl_absorpt_correction_type    multi-scan
_exptl_absorpt_correction_T_min   0.820
_exptl_absorpt_correction_T_max   0.913
_exptl_absorpt_process_details    'SADABS'
 
_exptl_special_details 
; 
 ? 
; 
 
_diffrn_ambient_temperature       120(2) 
_diffrn_radiation_wavelength      0.71073 
_diffrn_radiation_type            MoK\a 
_diffrn_radiation_source          'fine-focus sealed tube' 
_diffrn_radiation_monochromator   graphite 
_diffrn_measurement_device_type   'Bruker APEX II CCD area detector''
_diffrn_measurement_method        'omega scans'
_diffrn_detector_area_resol_mean  ? 
_diffrn_standards_number          ? 
_diffrn_standards_interval_count  ? 
_diffrn_standards_interval_time   ? 
_diffrn_standards_decay_%         ? 
_diffrn_reflns_number             27190 
_diffrn_reflns_av_R_equivalents   0.0396 
_diffrn_reflns_av_sigmaI/netI     0.0355 
_diffrn_reflns_limit_h_min        -24 
_diffrn_reflns_limit_h_max        24 
_diffrn_reflns_limit_k_min        -13 
_diffrn_reflns_limit_k_max        13 
_diffrn_reflns_limit_l_min        -19 
_diffrn_reflns_limit_l_max        19 
_diffrn_reflns_theta_min          2.45 
_diffrn_reflns_theta_max          29.00 
_reflns_number_total              6138 
_reflns_number_gt                 5239 
_reflns_threshold_expression      'I>2\s(I)'
 
_computing_data_collection        'Bruker APEX II'
_computing_cell_refinement        'Bruker SAINT'
_computing_data_reduction         'Bruker SAINT'
_computing_structure_solution     'SHELXS-97 (Sheldrick, 1997)'
_computing_structure_refinement   'SHELXL-97 (Sheldrick, 1997)'
_computing_molecular_graphics     'Bruker SHELXTL'
_computing_publication_material   'Bruker SHELXTL'
 
_refine_special_details 
; 
 Refinement of F^2^ against ALL reflections.  The weighted R-factor wR and 
 goodness of fit S are based on F^2^, conventional R-factors R are based 
 on F, with F set to zero for negative F^2^. The threshold expression of 
 F^2^ > 2sigma(F^2^) is used only for calculating R-factors(gt) etc. and is 
 not relevant to the choice of reflections for refinement.  R-factors based 
 on F^2^ are statistically about twice as large as those based on F, and R- 
 factors based on ALL data will be even larger. 
; 
 
_refine_ls_structure_factor_coef  Fsqd  
_refine_ls_matrix_type            full 
_refine_ls_weighting_scheme       calc  
_refine_ls_weighting_details 
 'calc w=1/[\s^2^(Fo^2^)+(0.0412P)^2^+1.4534P] where P=(Fo^2^+2Fc^2^)/3' 
_atom_sites_solution_primary      direct 
_atom_sites_solution_secondary    difmap 
_atom_sites_solution_hydrogens    geom 
_refine_ls_hydrogen_treatment     mixed 
_refine_ls_extinction_method      none 
_refine_ls_extinction_coef        ? 
_refine_ls_number_reflns          6138 
_refine_ls_number_parameters      364 
_refine_ls_number_restraints      0 
_refine_ls_R_factor_all           0.0496 
_refine_ls_R_factor_gt            0.0390 
_refine_ls_wR_factor_ref          0.0930 
_refine_ls_wR_factor_gt           0.0873 
_refine_ls_goodness_of_fit_ref    1.058 
_refine_ls_restrained_S_all       1.058 
_refine_ls_shift/su_max           0.001 
_refine_ls_shift/su_mean          0.000 
 
loop_ 
 _atom_site_label 
 _atom_site_type_symbol 
 _atom_site_fract_x 
 _atom_site_fract_y 
 _atom_site_fract_z 
 _atom_site_U_iso_or_equiv 
 _atom_site_adp_type 
 _atom_site_occupancy 
 _atom_site_symmetry_multiplicity 
 _atom_site_calc_flag 
 _atom_site_refinement_flags 
 _atom_site_disorder_assembly 
 _atom_site_disorder_group 
Fe1 Fe 0.206411(14) 0.51761(2) 0.421369(18) 0.01070(7) Uani 1 1 d . . . 
O1 O 0.25689(7) 0.67359(13) 0.39116(9) 0.0144(2) Uani 1 1 d . . . 
O2 O 0.32674(8) 0.86117(13) 0.32001(9) 0.0173(3) Uani 1 1 d . . . 
O3 O 0.30135(7) 0.43055(14) 0.50093(9) 0.0148(3) Uani 1 1 d . . . 
O4 O 0.43972(7) 0.38337(14) 0.63842(9) 0.0176(3) Uani 1 1 d . . . 
N1 N 0.20022(9) 0.59710(16) 0.54091(11) 0.0140(3) Uani 1 1 d . . . 
N2 N 0.14181(9) 0.36246(17) 0.44923(12) 0.0170(3) Uani 1 1 d . . . 
H2N H 0.1569(13) 0.286(3) 0.4351(16) 0.020(6) Uiso 1 1 d . . . 
N3 N 0.10052(9) 0.59306(16) 0.33459(11) 0.0152(3) Uani 1 1 d . . . 
H3N H 0.1000(13) 0.682(2) 0.3477(16) 0.018(5) Uiso 1 1 d . . . 
N4 N 0.21148(9) 0.43687(15) 0.30181(11) 0.0131(3) Uani 1 1 d . . . 
C1 C 0.32433(10) 0.88765(18) 0.41227(13) 0.0138(3) Uani 1 1 d . . . 
C2 C 0.35657(11) 1.00414(19) 0.46779(14) 0.0184(4) Uani 1 1 d . . . 
H2A H 0.3833 1.0722 0.4428 0.022 Uiso 1 1 calc R . . 
C3 C 0.35002(12) 1.0228(2) 0.56151(14) 0.0213(4) Uani 1 1 d . . . 
H3A H 0.3721 1.1034 0.5995 0.026 Uiso 1 1 calc R . . 
C4 C 0.31178(11) 0.9244(2) 0.59740(13) 0.0186(4) Uani 1 1 d . . . 
H4A H 0.3075 0.9373 0.6605 0.022 Uiso 1 1 calc R . . 
C5 C 0.27847(11) 0.80364(18) 0.54203(13) 0.0147(3) Uani 1 1 d . . . 
C6 C 0.28481(10) 0.78176(18) 0.44814(13) 0.0128(3) Uani 1 1 d . . . 
C7 C 0.23527(11) 0.70952(19) 0.58299(13) 0.0155(3) Uani 1 1 d . . . 
H7A H 0.2324 0.7321 0.6457 0.019 Uiso 1 1 calc R . . 
C8 C 0.15588(12) 0.5135(2) 0.59056(14) 0.0190(4) Uani 1 1 d . . . 
H8A H 0.0998 0.5469 0.5718 0.023 Uiso 1 1 calc R . . 
H8B H 0.1818 0.5206 0.6632 0.023 Uiso 1 1 calc R . . 
C9 C 0.15748(12) 0.3636(2) 0.55719(15) 0.0208(4) Uani 1 1 d . . . 
H9A H 0.2106 0.3214 0.5931 0.025 Uiso 1 1 calc R . . 
H9B H 0.1159 0.3083 0.5718 0.025 Uiso 1 1 calc R . . 
C10 C 0.05552(11) 0.3737(2) 0.38501(15) 0.0213(4) Uani 1 1 d . . . 
H10A H 0.0212 0.3359 0.4203 0.026 Uiso 1 1 calc R . . 
H10B H 0.0457 0.3182 0.3242 0.026 Uiso 1 1 calc R . . 
C11 C 0.03398(11) 0.5253(2) 0.35807(16) 0.0215(4) Uani 1 1 d . . . 
H11A H -0.0164 0.5307 0.3002 0.026 Uiso 1 1 calc R . . 
H11B H 0.0255 0.5740 0.4140 0.026 Uiso 1 1 calc R . . 
C12 C 0.09624(12) 0.5831(2) 0.22976(13) 0.0194(4) Uani 1 1 d . . . 
H12A H 0.1233 0.6646 0.2132 0.023 Uiso 1 1 calc R . . 
H12B H 0.0394 0.5832 0.1851 0.023 Uiso 1 1 calc R . . 
C13 C 0.13699(11) 0.4495(2) 0.21576(13) 0.0185(4) Uani 1 1 d . . . 
H13A H 0.1016 0.3684 0.2119 0.022 Uiso 1 1 calc R . . 
H13B H 0.1493 0.4540 0.1541 0.022 Uiso 1 1 calc R . . 
C14 C 0.27427(11) 0.38227(18) 0.29187(13) 0.0138(3) Uani 1 1 d . . . 
H14A H 0.2703 0.3526 0.2276 0.017 Uiso 1 1 calc R . . 
C15 C 0.43573(10) 0.36006(18) 0.54331(13) 0.0138(3) Uani 1 1 d . . . 
C16 C 0.35893(10) 0.38747(18) 0.47042(13) 0.0131(3) Uani 1 1 d . . . 
C17 C 0.35027(10) 0.36247(17) 0.37060(13) 0.0130(3) Uani 1 1 d . . . 
C18 C 0.41619(11) 0.31488(18) 0.34601(13) 0.0153(3) Uani 1 1 d . . . 
H18A H 0.4096 0.2980 0.2788 0.018 Uiso 1 1 calc R . . 
C19 C 0.48962(11) 0.29275(19) 0.41812(14) 0.0173(4) Uani 1 1 d . . . 
H19A H 0.5338 0.2624 0.4007 0.021 Uiso 1 1 calc R . . 
C20 C 0.49938(11) 0.31501(19) 0.51747(14) 0.0168(4) Uani 1 1 d . . . 
H20A H 0.5502 0.2990 0.5673 0.020 Uiso 1 1 calc R . . 
C21 C 0.36396(14) 0.9653(2) 0.27988(15) 0.0255(4) Uani 1 1 d . . . 
H21A H 0.3634 0.9353 0.2148 0.038 Uiso 1 1 calc R . . 
H21B H 0.4196 0.9788 0.3240 0.038 Uiso 1 1 calc R . . 
H21C H 0.3344 1.0532 0.2733 0.038 Uiso 1 1 calc R . . 
C22 C 0.51745(11) 0.3674(2) 0.71271(13) 0.0185(4) Uani 1 1 d . . . 
H22A H 0.5162 0.4015 0.7761 0.028 Uiso 1 1 calc R . . 
H22B H 0.5569 0.4209 0.6941 0.028 Uiso 1 1 calc R . . 
H22C H 0.5325 0.2686 0.7189 0.028 Uiso 1 1 calc R . . 
O1X O 0.04428(11) -0.17661(17) 0.48278(13) 0.0367(4) Uani 1 1 d . . . 
H1O H 0.0801 -0.1434 0.4770 0.033(18) Uiso 0.50 1 d PR A 2 
H2O H 0.0067 -0.1237 0.4901 0.036(15) Uiso 0.50 1 d PR A 2 
O2X O 0.16624(11) 0.12333(16) 0.32493(14) 0.0402(4) Uani 1 1 d . . . 
H3O H 0.2291 0.1008 0.3599 0.048 Uiso 0.50 1 d PR B 1 
H4O H 0.1383 0.0380 0.3399 0.048 Uiso 0.50 1 d PR B 1 
O2A O 0.08872(19) -0.1128(3) 0.3663(2) 0.0245(6) Uani 0.50 1 d P C 1 
O1A O 0.08291(19) 0.0395(3) 0.4742(2) 0.0289(7) Uani 0.50 1 d P C 1 
N1A N 0.07190(19) -0.0832(4) 0.4427(2) 0.0200(7) Uani 0.50 1 d P C 1 
O2A' O 0.13101(19) 0.0428(3) 0.4403(2) 0.0278(7) Uani 0.50 1 d P D 2 
N1A' N 0.1376(2) 0.0241(3) 0.3575(3) 0.0221(7) Uani 0.50 1 d P D 2 
O1A' O 0.12206(18) -0.0937(3) 0.3165(2) 0.0253(6) Uani 0.50 1 d P D 2 
 
loop_ 
 _atom_site_aniso_label 
 _atom_site_aniso_U_11 
 _atom_site_aniso_U_22 
 _atom_site_aniso_U_33 
 _atom_site_aniso_U_23 
 _atom_site_aniso_U_13 
 _atom_site_aniso_U_12 
Fe1 0.01067(12) 0.00916(12) 0.01253(12) 0.00005(9) 0.00439(9) -0.00045(9) 
O1 0.0182(6) 0.0126(6) 0.0139(6) -0.0025(5) 0.0077(5) -0.0040(5) 
O2 0.0234(7) 0.0152(6) 0.0152(6) -0.0011(5) 0.0091(5) -0.0066(5) 
O3 0.0123(6) 0.0198(6) 0.0135(6) 0.0010(5) 0.0059(5) 0.0027(5) 
O4 0.0135(6) 0.0262(7) 0.0129(6) -0.0002(5) 0.0043(5) 0.0029(5) 
N1 0.0133(7) 0.0150(7) 0.0159(7) 0.0018(6) 0.0079(6) 0.0013(5) 
N2 0.0172(8) 0.0114(7) 0.0247(8) 0.0003(6) 0.0102(7) -0.0004(6) 
N3 0.0153(7) 0.0123(7) 0.0171(7) -0.0014(6) 0.0046(6) 0.0011(6) 
N4 0.0149(7) 0.0101(7) 0.0135(7) -0.0011(5) 0.0039(6) -0.0013(5) 
C1 0.0137(8) 0.0137(8) 0.0135(8) 0.0007(6) 0.0043(7) 0.0011(6) 
C2 0.0200(9) 0.0128(8) 0.0208(9) 0.0003(7) 0.0050(7) -0.0030(7) 
C3 0.0248(10) 0.0150(9) 0.0211(9) -0.0068(7) 0.0042(8) -0.0037(7) 
C4 0.0230(9) 0.0177(9) 0.0147(8) -0.0061(7) 0.0062(7) -0.0003(7) 
C5 0.0150(8) 0.0139(8) 0.0155(8) -0.0025(6) 0.0057(7) 0.0002(6) 
C6 0.0112(8) 0.0114(8) 0.0151(8) -0.0009(6) 0.0040(6) 0.0008(6) 
C7 0.0159(8) 0.0194(9) 0.0124(8) -0.0006(6) 0.0064(7) 0.0031(7) 
C8 0.0192(9) 0.0212(9) 0.0209(9) 0.0018(7) 0.0123(7) -0.0029(7) 
C9 0.0217(10) 0.0194(9) 0.0244(10) 0.0074(7) 0.0119(8) 0.0008(7) 
C10 0.0152(9) 0.0201(9) 0.0290(10) -0.0016(8) 0.0084(8) -0.0054(7) 
C11 0.0127(8) 0.0230(10) 0.0282(10) 0.0000(8) 0.0067(8) -0.0012(7) 
C12 0.0198(9) 0.0211(9) 0.0141(9) 0.0003(7) 0.0019(7) 0.0043(7) 
C13 0.0177(9) 0.0196(9) 0.0151(8) -0.0039(7) 0.0020(7) 0.0005(7) 
C14 0.0181(8) 0.0109(8) 0.0134(8) -0.0012(6) 0.0068(7) -0.0029(6) 
C15 0.0147(8) 0.0136(8) 0.0136(8) -0.0004(6) 0.0056(7) -0.0006(6) 
C16 0.0139(8) 0.0113(8) 0.0155(8) 0.0009(6) 0.0070(7) -0.0012(6) 
C17 0.0144(8) 0.0100(8) 0.0157(8) 0.0003(6) 0.0067(7) -0.0006(6) 
C18 0.0200(9) 0.0134(8) 0.0161(8) -0.0019(6) 0.0107(7) -0.0012(7) 
C19 0.0158(8) 0.0172(9) 0.0228(9) -0.0018(7) 0.0115(7) 0.0017(7) 
C20 0.0135(8) 0.0160(9) 0.0206(9) 0.0003(7) 0.0054(7) 0.0012(6) 
C21 0.0355(12) 0.0218(10) 0.0223(10) 0.0016(8) 0.0141(9) -0.0111(8) 
C22 0.0141(8) 0.0256(10) 0.0145(8) 0.0014(7) 0.0034(7) 0.0008(7) 
O1X 0.0459(10) 0.0273(9) 0.0474(11) 0.0046(7) 0.0294(9) 0.0024(8) 
O2X 0.0564(11) 0.0168(8) 0.0621(12) 0.0044(7) 0.0392(10) 0.0021(7) 
O2A 0.0354(17) 0.0162(14) 0.0227(15) -0.0017(11) 0.0111(13) 0.0028(12) 
O1A 0.0323(17) 0.0257(16) 0.0268(15) -0.0104(12) 0.0080(13) 0.0030(13) 
N1A 0.0180(16) 0.0214(17) 0.0167(15) 0.0004(13) 0.0012(12) 0.0076(13) 
O2A' 0.0363(17) 0.0222(15) 0.0260(16) -0.0039(12) 0.0121(14) -0.0006(12) 
N1A' 0.0185(16) 0.0193(16) 0.0238(17) 0.0007(13) 0.0015(13) 0.0057(13) 
O1A' 0.0313(16) 0.0118(13) 0.0269(15) -0.0002(11) 0.0029(13) 0.0012(11) 
 
_geom_special_details 
; 
 All esds (except the esd in the dihedral angle between two l.s. planes) 
 are estimated using the full covariance matrix.  The cell esds are taken 
 into account individually in the estimation of esds in distances, angles 
 and torsion angles; correlations between esds in cell parameters are only 
 used when they are defined by crystal symmetry.  An approximate (isotropic) 
 treatment of cell esds is used for estimating esds involving l.s. planes. 
; 
 
loop_ 
 _geom_bond_atom_site_label_1 
 _geom_bond_atom_site_label_2 
 _geom_bond_distance 
 _geom_bond_site_symmetry_2 
 _geom_bond_publ_flag 
Fe1 O3 1.8727(12) . ? 
Fe1 O1 1.8734(12) . ? 
Fe1 N4 1.9243(15) . ? 
Fe1 N1 1.9265(15) . ? 
Fe1 N3 1.9961(15) . ? 
Fe1 N2 2.0049(16) . ? 
O1 C6 1.310(2) . ? 
O2 C1 1.373(2) . ? 
O2 C21 1.429(2) . ? 
O3 C16 1.314(2) . ? 
O4 C15 1.370(2) . ? 
O4 C22 1.430(2) . ? 
N1 C7 1.287(2) . ? 
N1 C8 1.475(2) . ? 
N2 C9 1.486(2) . ? 
N2 C10 1.492(2) . ? 
N2 H2N 0.83(2) . ? 
N3 C11 1.489(2) . ? 
N3 C12 1.493(2) . ? 
N3 H3N 0.87(2) . ? 
N4 C14 1.285(2) . ? 
N4 C13 1.470(2) . ? 
C1 C2 1.378(2) . ? 
C1 C6 1.431(2) . ? 
C2 C3 1.411(3) . ? 
C2 H2A 0.9500 . ? 
C3 C4 1.367(3) . ? 
C3 H3A 0.9500 . ? 
C4 C5 1.415(2) . ? 
C4 H4A 0.9500 . ? 
C5 C6 1.416(2) . ? 
C5 C7 1.440(2) . ? 
C7 H7A 0.9500 . ? 
C8 C9 1.520(3) . ? 
C8 H8A 0.9900 . ? 
C8 H8B 0.9900 . ? 
C9 H9A 0.9900 . ? 
C9 H9B 0.9900 . ? 
C10 C11 1.520(3) . ? 
C10 H10A 0.9900 . ? 
C10 H10B 0.9900 . ? 
C11 H11A 0.9900 . ? 
C11 H11B 0.9900 . ? 
C12 C13 1.520(3) . ? 
C12 H12A 0.9900 . ? 
C12 H12B 0.9900 . ? 
C13 H13A 0.9900 . ? 
C13 H13B 0.9900 . ? 
C14 C17 1.442(2) . ? 
C14 H14A 0.9500 . ? 
C15 C20 1.379(2) . ? 
C15 C16 1.426(2) . ? 
C16 C17 1.417(2) . ? 
C17 C18 1.413(2) . ? 
C18 C19 1.371(3) . ? 
C18 H18A 0.9500 . ? 
C19 C20 1.401(3) . ? 
C19 H19A 0.9500 . ? 
C20 H20A 0.9500 . ? 
C21 H21A 0.9800 . ? 
C21 H21B 0.9800 . ? 
C21 H21C 0.9800 . ? 
C22 H22A 0.9800 . ? 
C22 H22B 0.9800 . ? 
C22 H22C 0.9800 . ? 
O1X N1A 1.256(4) . ? 
O1X H1O 0.7429 . ? 
O1X H2O 0.8749 . ? 
O2X N1A' 1.247(4) . ? 
O2X H3O 1.0740 . ? 
O2X H4O 1.0200 . ? 
O2A N1A 1.273(4) . ? 
O1A N1A 1.254(4) . ? 
O2A' N1A' 1.255(5) . ? 
N1A' O1A' 1.261(4) . ? 
 
loop_ 
 _geom_angle_atom_site_label_1 
 _geom_angle_atom_site_label_2 
 _geom_angle_atom_site_label_3 
 _geom_angle 
 _geom_angle_site_symmetry_1 
 _geom_angle_site_symmetry_3 
 _geom_angle_publ_flag 
O3 Fe1 O1 95.61(6) . . ? 
O3 Fe1 N4 93.24(6) . . ? 
O1 Fe1 N4 86.32(6) . . ? 
O3 Fe1 N1 87.02(6) . . ? 
O1 Fe1 N1 94.30(6) . . ? 
N4 Fe1 N1 179.31(6) . . ? 
O3 Fe1 N3 174.72(6) . . ? 
O1 Fe1 N3 89.23(6) . . ? 
N4 Fe1 N3 84.95(6) . . ? 
N1 Fe1 N3 94.74(6) . . ? 
O3 Fe1 N2 90.07(6) . . ? 
O1 Fe1 N2 174.02(6) . . ? 
N4 Fe1 N2 95.24(6) . . ? 
N1 Fe1 N2 84.12(7) . . ? 
N3 Fe1 N2 85.16(7) . . ? 
C6 O1 Fe1 126.41(11) . . ? 
C1 O2 C21 116.18(14) . . ? 
C16 O3 Fe1 125.01(11) . . ? 
C15 O4 C22 115.65(14) . . ? 
C7 N1 C8 118.61(15) . . ? 
C7 N1 Fe1 125.84(12) . . ? 
C8 N1 Fe1 115.39(12) . . ? 
C9 N2 C10 115.25(15) . . ? 
C9 N2 Fe1 107.19(12) . . ? 
C10 N2 Fe1 110.93(12) . . ? 
C9 N2 H2N 107.9(16) . . ? 
C10 N2 H2N 105.1(16) . . ? 
Fe1 N2 H2N 110.4(16) . . ? 
C11 N3 C12 116.17(15) . . ? 
C11 N3 Fe1 110.31(12) . . ? 
C12 N3 Fe1 108.44(11) . . ? 
C11 N3 H3N 107.9(14) . . ? 
C12 N3 H3N 106.4(14) . . ? 
Fe1 N3 H3N 107.3(15) . . ? 
C14 N4 C13 119.92(15) . . ? 
C14 N4 Fe1 125.44(12) . . ? 
C13 N4 Fe1 114.52(11) . . ? 
O2 C1 C2 124.59(16) . . ? 
O2 C1 C6 113.97(15) . . ? 
C2 C1 C6 121.43(16) . . ? 
C1 C2 C3 120.32(17) . . ? 
C1 C2 H2A 119.8 . . ? 
C3 C2 H2A 119.8 . . ? 
C4 C3 C2 119.69(17) . . ? 
C4 C3 H3A 120.2 . . ? 
C2 C3 H3A 120.2 . . ? 
C3 C4 C5 121.09(17) . . ? 
C3 C4 H4A 119.5 . . ? 
C5 C4 H4A 119.5 . . ? 
C4 C5 C6 120.37(16) . . ? 
C4 C5 C7 117.32(16) . . ? 
C6 C5 C7 122.24(16) . . ? 
O1 C6 C5 125.47(16) . . ? 
O1 C6 C1 117.43(15) . . ? 
C5 C6 C1 117.09(15) . . ? 
N1 C7 C5 124.82(16) . . ? 
N1 C7 H7A 117.6 . . ? 
C5 C7 H7A 117.6 . . ? 
N1 C8 C9 106.74(15) . . ? 
N1 C8 H8A 110.4 . . ? 
C9 C8 H8A 110.4 . . ? 
N1 C8 H8B 110.4 . . ? 
C9 C8 H8B 110.4 . . ? 
H8A C8 H8B 108.6 . . ? 
N2 C9 C8 108.81(15) . . ? 
N2 C9 H9A 109.9 . . ? 
C8 C9 H9A 109.9 . . ? 
N2 C9 H9B 109.9 . . ? 
C8 C9 H9B 109.9 . . ? 
H9A C9 H9B 108.3 . . ? 
N2 C10 C11 109.88(15) . . ? 
N2 C10 H10A 109.7 . . ? 
C11 C10 H10A 109.7 . . ? 
N2 C10 H10B 109.7 . . ? 
C11 C10 H10B 109.7 . . ? 
H10A C10 H10B 108.2 . . ? 
N3 C11 C10 109.14(15) . . ? 
N3 C11 H11A 109.9 . . ? 
C10 C11 H11A 109.9 . . ? 
N3 C11 H11B 109.9 . . ? 
C10 C11 H11B 109.9 . . ? 
H11A C11 H11B 108.3 . . ? 
N3 C12 C13 109.35(15) . . ? 
N3 C12 H12A 109.8 . . ? 
C13 C12 H12A 109.8 . . ? 
N3 C12 H12B 109.8 . . ? 
C13 C12 H12B 109.8 . . ? 
H12A C12 H12B 108.3 . . ? 
N4 C13 C12 106.67(14) . . ? 
N4 C13 H13A 110.4 . . ? 
C12 C13 H13A 110.4 . . ? 
N4 C13 H13B 110.4 . . ? 
C12 C13 H13B 110.4 . . ? 
H13A C13 H13B 108.6 . . ? 
N4 C14 C17 125.12(16) . . ? 
N4 C14 H14A 117.4 . . ? 
C17 C14 H14A 117.4 . . ? 
O4 C15 C20 124.33(16) . . ? 
O4 C15 C16 114.27(15) . . ? 
C20 C15 C16 121.40(16) . . ? 
O3 C16 C17 125.11(16) . . ? 
O3 C16 C15 117.77(15) . . ? 
C17 C16 C15 117.11(15) . . ? 
C18 C17 C16 120.44(16) . . ? 
C18 C17 C14 118.28(16) . . ? 
C16 C17 C14 121.28(16) . . ? 
C19 C18 C17 120.70(16) . . ? 
C19 C18 H18A 119.7 . . ? 
C17 C18 H18A 119.7 . . ? 
C18 C19 C20 119.91(16) . . ? 
C18 C19 H19A 120.0 . . ? 
C20 C19 H19A 120.0 . . ? 
C15 C20 C19 120.43(17) . . ? 
C15 C20 H20A 119.8 . . ? 
C19 C20 H20A 119.8 . . ? 
O2 C21 H21A 109.5 . . ? 
O2 C21 H21B 109.5 . . ? 
H21A C21 H21B 109.5 . . ? 
O2 C21 H21C 109.5 . . ? 
H21A C21 H21C 109.5 . . ? 
H21B C21 H21C 109.5 . . ? 
O4 C22 H22A 109.5 . . ? 
O4 C22 H22B 109.5 . . ? 
H22A C22 H22B 109.5 . . ? 
O4 C22 H22C 109.5 . . ? 
H22A C22 H22C 109.5 . . ? 
H22B C22 H22C 109.5 . . ? 
N1A O1X H2O 94.6 . . ? 
H1O O1X H2O 119.1 . . ? 
N1A' O2X H3O 99.4 . . ? 
H3O O2X H4O 104.0 . . ? 
O1A N1A O1X 122.6(3) . . ? 
O1A N1A O2A 118.1(3) . . ? 
O1X N1A O2A 119.3(3) . . ? 
O1A N1A H1O 121.3 . . ? 
O2A N1A H1O 110.8 . . ? 
O2X N1A' O1A' 124.0(3) . . ? 
O2X N1A' O2A' 115.9(3) . . ? 
O1A' N1A' O2A' 119.9(3) . . ? 
O1A' N1A' H4O 93.9 . . ? 
O2A' N1A' H4O 144.5 . . ? 
 
loop_ 
 _geom_torsion_atom_site_label_1 
 _geom_torsion_atom_site_label_2 
 _geom_torsion_atom_site_label_3 
 _geom_torsion_atom_site_label_4 
 _geom_torsion 
 _geom_torsion_site_symmetry_1 
 _geom_torsion_site_symmetry_2 
 _geom_torsion_site_symmetry_3 
 _geom_torsion_site_symmetry_4 
 _geom_torsion_publ_flag 
O3 Fe1 O1 C6 -79.07(14) . . . . ? 
N4 Fe1 O1 C6 -171.97(14) . . . . ? 
N1 Fe1 O1 C6 8.35(14) . . . . ? 
N3 Fe1 O1 C6 103.04(14) . . . . ? 
N2 Fe1 O1 C6 82.7(6) . . . . ? 
O1 Fe1 O3 C16 -62.58(14) . . . . ? 
N4 Fe1 O3 C16 24.03(14) . . . . ? 
N1 Fe1 O3 C16 -156.61(14) . . . . ? 
N3 Fe1 O3 C16 93.8(6) . . . . ? 
N2 Fe1 O3 C16 119.28(14) . . . . ? 
O3 Fe1 N1 C7 85.15(15) . . . . ? 
O1 Fe1 N1 C7 -10.26(16) . . . . ? 
N4 Fe1 N1 C7 -163(6) . . . . ? 
N3 Fe1 N1 C7 -99.84(16) . . . . ? 
N2 Fe1 N1 C7 175.53(16) . . . . ? 
O3 Fe1 N1 C8 -90.03(13) . . . . ? 
O1 Fe1 N1 C8 174.56(12) . . . . ? 
N4 Fe1 N1 C8 22(6) . . . . ? 
N3 Fe1 N1 C8 84.98(13) . . . . ? 
N2 Fe1 N1 C8 0.35(13) . . . . ? 
O3 Fe1 N2 C9 62.63(12) . . . . ? 
O1 Fe1 N2 C9 -99.3(6) . . . . ? 
N4 Fe1 N2 C9 155.88(12) . . . . ? 
N1 Fe1 N2 C9 -24.37(12) . . . . ? 
N3 Fe1 N2 C9 -119.65(12) . . . . ? 
O3 Fe1 N2 C10 -170.77(13) . . . . ? 
O1 Fe1 N2 C10 27.4(6) . . . . ? 
N4 Fe1 N2 C10 -77.51(13) . . . . ? 
N1 Fe1 N2 C10 102.24(13) . . . . ? 
N3 Fe1 N2 C10 6.96(13) . . . . ? 
O3 Fe1 N3 C11 41.9(7) . . . . ? 
O1 Fe1 N3 C11 -161.65(12) . . . . ? 
N4 Fe1 N3 C11 111.98(13) . . . . ? 
N1 Fe1 N3 C11 -67.40(13) . . . . ? 
N2 Fe1 N3 C11 16.27(12) . . . . ? 
O3 Fe1 N3 C12 -86.4(6) . . . . ? 
O1 Fe1 N3 C12 70.10(12) . . . . ? 
N4 Fe1 N3 C12 -16.27(12) . . . . ? 
N1 Fe1 N3 C12 164.35(12) . . . . ? 
N2 Fe1 N3 C12 -111.98(12) . . . . ? 
O3 Fe1 N4 C14 -17.36(15) . . . . ? 
O1 Fe1 N4 C14 78.07(15) . . . . ? 
N1 Fe1 N4 C14 -129(6) . . . . ? 
N3 Fe1 N4 C14 167.62(15) . . . . ? 
N2 Fe1 N4 C14 -107.73(15) . . . . ? 
O3 Fe1 N4 C13 166.60(12) . . . . ? 
O1 Fe1 N4 C13 -97.98(13) . . . . ? 
N1 Fe1 N4 C13 55(6) . . . . ? 
N3 Fe1 N4 C13 -8.43(12) . . . . ? 
N2 Fe1 N4 C13 76.23(13) . . . . ? 
C21 O2 C1 C2 -1.6(3) . . . . ? 
C21 O2 C1 C6 178.62(16) . . . . ? 
O2 C1 C2 C3 179.12(17) . . . . ? 
C6 C1 C2 C3 -1.1(3) . . . . ? 
C1 C2 C3 C4 0.3(3) . . . . ? 
C2 C3 C4 C5 0.0(3) . . . . ? 
C3 C4 C5 C6 0.6(3) . . . . ? 
C3 C4 C5 C7 -176.50(18) . . . . ? 
Fe1 O1 C6 C5 -3.2(2) . . . . ? 
Fe1 O1 C6 C1 177.53(11) . . . . ? 
C4 C5 C6 O1 179.39(17) . . . . ? 
C7 C5 C6 O1 -3.7(3) . . . . ? 
C4 C5 C6 C1 -1.3(3) . . . . ? 
C7 C5 C6 C1 175.63(16) . . . . ? 
O2 C1 C6 O1 0.7(2) . . . . ? 
C2 C1 C6 O1 -179.06(16) . . . . ? 
O2 C1 C6 C5 -178.62(15) . . . . ? 
C2 C1 C6 C5 1.6(3) . . . . ? 
C8 N1 C7 C5 -177.96(16) . . . . ? 
Fe1 N1 C7 C5 7.0(3) . . . . ? 
C4 C5 C7 N1 178.52(17) . . . . ? 
C6 C5 C7 N1 1.5(3) . . . . ? 
C7 N1 C8 C9 -152.44(16) . . . . ? 
Fe1 N1 C8 C9 23.12(18) . . . . ? 
C10 N2 C9 C8 -80.74(19) . . . . ? 
Fe1 N2 C9 C8 43.27(17) . . . . ? 
N1 C8 C9 N2 -42.9(2) . . . . ? 
C9 N2 C10 C11 93.70(19) . . . . ? 
Fe1 N2 C10 C11 -28.32(19) . . . . ? 
C12 N3 C11 C10 88.19(19) . . . . ? 
Fe1 N3 C11 C10 -35.70(18) . . . . ? 
N2 C10 C11 N3 41.7(2) . . . . ? 
C11 N3 C12 C13 -87.88(19) . . . . ? 
Fe1 N3 C12 C13 36.97(17) . . . . ? 
C14 N4 C13 C12 -145.96(17) . . . . ? 
Fe1 N4 C13 C12 30.33(18) . . . . ? 
N3 C12 C13 N4 -43.2(2) . . . . ? 
C13 N4 C14 C17 -179.14(16) . . . . ? 
Fe1 N4 C14 C17 5.0(3) . . . . ? 
C22 O4 C15 C20 4.2(2) . . . . ? 
C22 O4 C15 C16 -175.32(15) . . . . ? 
Fe1 O3 C16 C17 -19.1(2) . . . . ? 
Fe1 O3 C16 C15 162.60(12) . . . . ? 
O4 C15 C16 O3 -0.2(2) . . . . ? 
C20 C15 C16 O3 -179.79(16) . . . . ? 
O4 C15 C16 C17 -178.64(15) . . . . ? 
C20 C15 C16 C17 1.8(3) . . . . ? 
O3 C16 C17 C18 -179.40(16) . . . . ? 
C15 C16 C17 C18 -1.1(2) . . . . ? 
O3 C16 C17 C14 -0.5(3) . . . . ? 
C15 C16 C17 C14 177.77(15) . . . . ? 
N4 C14 C17 C18 -173.21(17) . . . . ? 
N4 C14 C17 C16 7.9(3) . . . . ? 
C16 C17 C18 C19 -0.3(3) . . . . ? 
C14 C17 C18 C19 -179.25(16) . . . . ? 
C17 C18 C19 C20 1.1(3) . . . . ? 
O4 C15 C20 C19 179.45(17) . . . . ? 
C16 C15 C20 C19 -1.0(3) . . . . ? 
C18 C19 C20 C15 -0.5(3) . . . . ? 
 
_diffrn_measured_fraction_theta_max    1.000 
_diffrn_reflns_theta_full              29.00 
_diffrn_measured_fraction_theta_full   1.000 
_refine_diff_density_max    0.413 
_refine_diff_density_min   -0.549 
_refine_diff_density_rms    0.066 

loop_                                                                           
 _geom_hbond_atom_site_label_D                                                  
 _geom_hbond_atom_site_label_H                                                  
 _geom_hbond_atom_site_label_A                                                  
 _geom_hbond_site_symmetry_A                                                    
 _geom_hbond_distance_DH                                                        
 _geom_hbond_distance_HA                                                        
 _geom_hbond_distance_DA                                                        
 _geom_hbond_angle_DHA  
 _geom_hbond_publ_flag                                 
N2    H2N    O2A'   1_555    0.83(3)    2.39(3)   3.073(3)     141(2)  ?
N2    H2N    O2X    1_555    0.83(3)    2.28(3)   3.038(2)     152(2)' ?
N3    H3N    O1A'   1_565    0.875(19)  2.26(2)   3.053(3)     150(2)  ?
N3    H3N    O2A    1_565    0.875(19)  2.01(2)   2.879(3)     174(2)' ?

_publ_section_references 
;
Bruker, Programs APEX II, version 2.0-1; SAINT, version 7.23A;
SADABS, version 2004/1; XPREP, version 2005/2;
SHELXTL, version 6.1. Bruker AXS Inc., Madison, WI, USA, 2005.

G.M. Sheldrick, Programs SHELXS97 (crystal structure solution)
and SHELXL97 (crystal structure refinement), University  of
Gottingen, Germany, 1997.
;
