# Supplementary material for: Magnetism, Conductivity and Spin-Spin Interactions in Layered Hybrid Structure of Anionic Radicals [Ni(dmit)2] Alternated by Iron(III) Spin-Crossover Complex [Fe(III)(3-OMe-Sal2trien)] and Ferric Moiety Precursors
Source: Molecules. 2020 Oct 24;25(21):4922. doi: 10.3390/molecules25214922 (PMC7663777; doi:10.3390/molecules25214922)
Supplement: Supplementary file 1 [file molecules-25-04922-s001.zip › 2_293K.cif]

 
data_shelx
 
_audit_creation_method            'SHELXL-2016/6'
_shelx_SHELXL_version_number      '2016/6'
_chemical_name_systematic         ?
_chemical_name_common             ?
_chemical_melting_point           ?
_chemical_formula_moiety          
 'C22 H28 Fe N4 O4, N O3, H2 O'
_chemical_formula_sum
 'C22 H30 Fe N5 O8' 
_chemical_formula_weight          548.36

loop_
 _atom_type_symbol
 _atom_type_description
 _atom_type_scat_dispersion_real
 _atom_type_scat_dispersion_imag
 _atom_type_scat_source
 'C'  'C'   0.0033   0.0016
 'International Tables Vol C Tables 4.2.6.8 and 6.1.1.4'
 'H'  'H'   0.0000   0.0000
 'International Tables Vol C Tables 4.2.6.8 and 6.1.1.4'
 'N'  'N'   0.0061   0.0033
 'International Tables Vol C Tables 4.2.6.8 and 6.1.1.4'
 'O'  'O'   0.0106   0.0060
 'International Tables Vol C Tables 4.2.6.8 and 6.1.1.4'
 'Fe'  'Fe'   0.3463   0.8444
 'International Tables Vol C Tables 4.2.6.8 and 6.1.1.4'
 
_space_group_crystal_system       monoclinic
_space_group_IT_number            14
_space_group_name_H-M_alt         'P 21/c'
_space_group_name_Hall            '-P 2ybc'
 
_shelx_space_group_comment
;
The symmetry employed for this shelxl refinement is uniquely defined
by the following loop, which should always be used as a source of
symmetry information in preference to the above space-group names.
They are only intended as comments.
;
 
loop_
 _space_group_symop_operation_xyz
 'x, y, z'
 '-x, y+1/2, -z+1/2'
 '-x, -y, -z'
 'x, -y-1/2, z-1/2'
 
_cell_length_a                    17.9547(3)
_cell_length_b                    9.68170(10)
_cell_length_c                    14.4568(2)
_cell_angle_alpha                 90
_cell_angle_beta                  110.178(2)
_cell_angle_gamma                 90
_cell_volume                      2358.82(6)
_cell_formula_units_Z             4
_cell_measurement_temperature     293(2)
_cell_measurement_reflns_used     9585
_cell_measurement_theta_min       2.4140
_cell_measurement_theta_max       31.0160
 
_exptl_crystal_description        plate
_exptl_crystal_colour             black
_exptl_crystal_density_meas       ?
_exptl_crystal_density_method     ?
_exptl_crystal_density_diffrn     1.544          
_exptl_crystal_F_000              1148
_exptl_transmission_factor_min    ?
_exptl_transmission_factor_max    ?
_exptl_crystal_size_max           0.60
_exptl_crystal_size_mid           0.19
_exptl_crystal_size_min           0.05
_exptl_absorpt_coefficient_mu     0.699
_shelx_estimated_absorpt_T_min    0.679
_shelx_estimated_absorpt_T_max    0.966
_exptl_absorpt_correction_T_min   0.84310
_exptl_absorpt_correction_T_max   1.00000
_exptl_absorpt_correction_type    multi-scan
_exptl_absorpt_process_details
;
CrysAlisPro 1.171.38.43 (Rigaku Oxford Diffraction, 2015)
Empirical absorption correction using spherical harmonics,
 implemented in SCALE3 ABSPACK scaling algorithm.
;
_diffrn_ambient_temperature       293(2)
_diffrn_source                    'fine-focus sealed X-ray tube'
_diffrn_source_type               'Enhance (Mo) X-ray Source'
_diffrn_radiation_probe           x-ray
_diffrn_radiation_type            'Mo K\a'
_diffrn_radiation_wavelength      0.71073
_diffrn_radiation_monochromator   graphite
_diffrn_measurement_device        'four-circle diffractometer'
_diffrn_measurement_device_type   'Xcalibur, AtlasS2, Gemini'
_diffrn_measurement_method        '\w scans'
_diffrn_detector                  'CCD plate'
_diffrn_detector_type             AtlasS2
_diffrn_detector_area_resol_mean  10.4566
_diffrn_reflns_number             23118
_diffrn_reflns_av_unetI/netI      0.0212
_diffrn_reflns_av_R_equivalents   0.0242
_diffrn_reflns_limit_h_min        -25
_diffrn_reflns_limit_h_max        24
_diffrn_reflns_limit_k_min        -13
_diffrn_reflns_limit_k_max        13
_diffrn_reflns_limit_l_min        -19
_diffrn_reflns_limit_l_max        19
_diffrn_reflns_theta_min          2.426
_diffrn_reflns_theta_max          31.006
_diffrn_reflns_theta_full         29.000
_diffrn_measured_fraction_theta_max   0.891
_diffrn_measured_fraction_theta_full  0.991
_diffrn_reflns_Laue_measured_fraction_max    0.891
_diffrn_reflns_Laue_measured_fraction_full   0.991
_diffrn_reflns_point_group_measured_fraction_max   0.891
_diffrn_reflns_point_group_measured_fraction_full  0.991
_reflns_number_total              6700
_reflns_number_gt                 5748
_reflns_threshold_expression      'I > 2\s(I)'
_reflns_Friedel_coverage          0.000
_reflns_Friedel_fraction_max      .
_reflns_Friedel_fraction_full     .
 
_reflns_special_details
;
 Reflections were merged by SHELXL according to the crystal
 class for the calculation of statistics and refinement.
 
 _reflns_Friedel_fraction is defined as the number of unique
 Friedel pairs measured divided by the number that would be
 possible theoretically, ignoring centric projections and
 systematic absences.
;
 
_computing_data_collection        'CrysAlisPro 1.171.38.43 (Rigaku OD, 2015)'
_computing_cell_refinement        'CrysAlisPro 1.171.38.43 (Rigaku OD, 2015)'
_computing_data_reduction         'CrysAlisPro 1.171.38.43 (Rigaku OD, 2015)'
_computing_structure_solution     'SHELXS-2016/6 (Sheldrick, 2016)'
_computing_structure_refinement   'SHELXL-2016/6 (Sheldrick, 2016)'
_computing_molecular_graphics     ?
_computing_publication_material   ?
_refine_special_details           ?
_refine_ls_structure_factor_coef  Fsqd
_refine_ls_matrix_type            full
_refine_ls_weighting_scheme       calc
_refine_ls_weighting_details
'w=1/[\s^2^(Fo^2^)+(0.0438P)^2^+0.5537P] where P=(Fo^2^+2Fc^2^)/3'
_atom_sites_solution_primary      ?
_atom_sites_solution_secondary    ?
_atom_sites_solution_hydrogens    mixed
_refine_ls_hydrogen_treatment     mixed
_refine_ls_extinction_method      none
_refine_ls_extinction_coef        .
_refine_ls_number_reflns          6700
_refine_ls_number_parameters      385
_refine_ls_number_restraints      9
_refine_ls_R_factor_all           0.0384
_refine_ls_R_factor_gt            0.0310
_refine_ls_wR_factor_ref          0.0870
_refine_ls_wR_factor_gt           0.0819
_refine_ls_goodness_of_fit_ref    1.055
_refine_ls_restrained_S_all       1.054
_refine_ls_shift/su_max           0.018
_refine_ls_shift/su_mean          0.001
 
loop_
 _atom_site_label
 _atom_site_type_symbol
 _atom_site_fract_x
 _atom_site_fract_y
 _atom_site_fract_z
 _atom_site_U_iso_or_equiv
 _atom_site_adp_type
 _atom_site_occupancy
 _atom_site_site_symmetry_order  
 _atom_site_calc_flag
 _atom_site_refinement_flags_posn
 _atom_site_refinement_flags_adp
 _atom_site_refinement_flags_occupancy
 _atom_site_disorder_assembly
 _atom_site_disorder_group
Fe1 Fe 0.20696(2) 0.51894(2) 0.42072(2) 0.02575(6) Uani 1 1 d . . . . .
O1 O 0.25700(5) 0.67379(9) 0.39077(6) 0.03132(19) Uani 1 1 d . . . . .
O2 O 0.32846(6) 0.85756(11) 0.32130(7) 0.0405(2) Uani 1 1 d . . . . .
O3 O 0.30078(5) 0.43232(11) 0.49919(6) 0.0328(2) Uani 1 1 d . . . . .
O4 O 0.43760(6) 0.38575(12) 0.63483(7) 0.0411(2) Uani 1 1 d . . . . .
N1 N 0.20082(6) 0.59770(12) 0.54033(8) 0.0311(2) Uani 1 1 d . . . . .
N2 N 0.14289(7) 0.36542(12) 0.44899(9) 0.0374(3) Uani 1 1 d . . . . .
H2 H 0.163514 0.277908 0.433700 0.045 Uiso 1 1 calc R U . . .
N3 N 0.10218(7) 0.59378(12) 0.33428(8) 0.0350(2) Uani 1 1 d . . . . .
H3 H 0.100913 0.691927 0.350264 0.042 Uiso 1 1 calc R U . . .
N4 N 0.21167(6) 0.43879(11) 0.30088(8) 0.0296(2) Uani 1 1 d . . . . .
C1 C 0.32557(8) 0.88314(14) 0.41293(9) 0.0314(3) Uani 1 1 d . . . . .
C2 C 0.35794(10) 0.99760(15) 0.46900(12) 0.0419(3) Uani 1 1 d . . . . .
H2A H 0.383935 1.063792 0.444711 0.050 Uiso 1 1 calc R U . . .
C3 C 0.35192(11) 1.01492(17) 0.56256(12) 0.0489(4) Uani 1 1 d . . . . .
H3A H 0.374019 1.092203 0.600244 0.059 Uiso 1 1 calc R U . . .
C4 C 0.31386(10) 0.91881(17) 0.59777(11) 0.0435(3) Uani 1 1 d . . . . .
H4 H 0.310222 0.930892 0.659889 0.052 Uiso 1 1 calc R U . . .
C5 C 0.27944(8) 0.80018(14) 0.54200(9) 0.0322(3) Uani 1 1 d . . . . .
C6 C 0.28582(7) 0.77944(13) 0.44832(9) 0.0276(2) Uani 1 1 d . . . . .
C7 C 0.23613(8) 0.70855(15) 0.58219(9) 0.0343(3) Uani 1 1 d . . . . .
H7 H 0.233237 0.730782 0.643437 0.041 Uiso 1 1 calc R U . . .
C8 C 0.15629(10) 0.51578(18) 0.58931(12) 0.0446(4) Uani 1 1 d . . . . .
H8A H 0.102063 0.548727 0.570521 0.054 Uiso 1 1 calc R U . . .
H8B H 0.180825 0.522845 0.660329 0.054 Uiso 1 1 calc R U . . .
C9 C 0.15773(10) 0.36820(18) 0.55661(12) 0.0482(4) Uani 1 1 d . . . . .
H9A H 0.208946 0.327096 0.591960 0.058 Uiso 1 1 calc R U . . .
H9B H 0.117262 0.315111 0.571092 0.058 Uiso 1 1 calc R U . . .
C10 C 0.05801(9) 0.37640(18) 0.38496(14) 0.0479(4) Uani 1 1 d . . . . .
H10A H 0.024602 0.340259 0.419625 0.058 Uiso 1 1 calc R U . . .
H10B H 0.048816 0.321781 0.325800 0.058 Uiso 1 1 calc R U . . .
C11 C 0.03666(9) 0.52507(19) 0.35724(14) 0.0478(4) Uani 1 1 d . . . . .
H11A H -0.011704 0.529312 0.300258 0.057 Uiso 1 1 calc R U . . .
H11B H 0.027382 0.572593 0.411337 0.057 Uiso 1 1 calc R U . . .
C12 C 0.09886(9) 0.58512(17) 0.23030(10) 0.0434(3) Uani 1 1 d . . . . .
H12A H 0.125805 0.664001 0.214930 0.052 Uiso 1 1 calc R U . . .
H12B H 0.044026 0.586572 0.186426 0.052 Uiso 1 1 calc R U . . .
C13 C 0.13832(9) 0.45284(17) 0.21534(10) 0.0417(3) Uani 1 1 d . . . . .
H13A H 0.103681 0.374445 0.211237 0.050 Uiso 1 1 calc R U . . .
H13B H 0.150351 0.457596 0.154959 0.050 Uiso 1 1 calc R U . . .
C14 C 0.27304(8) 0.38334(13) 0.29067(9) 0.0314(3) Uani 1 1 d . . . . .
H14 H 0.269018 0.354209 0.227825 0.038 Uiso 1 1 calc R U . . .
C15 C 0.43291(7) 0.36099(14) 0.54030(10) 0.0312(3) Uani 1 1 d . . . . .
C16 C 0.35704(7) 0.38833(13) 0.46800(9) 0.0277(2) Uani 1 1 d . . . . .
C17 C 0.34779(8) 0.36246(13) 0.36868(9) 0.0301(2) Uani 1 1 d . . . . .
C18 C 0.41251(9) 0.31324(15) 0.34366(11) 0.0369(3) Uani 1 1 d . . . . .
H18 H 0.405752 0.295578 0.278021 0.044 Uiso 1 1 calc R U . . .
C19 C 0.48464(9) 0.29136(17) 0.41445(12) 0.0424(3) Uani 1 1 d . . . . .
H19 H 0.527009 0.260587 0.396912 0.051 Uiso 1 1 calc R U . . .
C20 C 0.49494(8) 0.31518(16) 0.51344(11) 0.0385(3) Uani 1 1 d . . . . .
H20 H 0.544251 0.299878 0.561571 0.046 Uiso 1 1 calc R U . . .
C21 C 0.36559(13) 0.9598(2) 0.28097(14) 0.0571(5) Uani 1 1 d . . . . .
H21A H 0.337762 1.045758 0.275365 0.086 Uiso 1 1 calc R U . . .
H21B H 0.364352 0.930829 0.216942 0.086 Uiso 1 1 calc R U . . .
H21C H 0.419676 0.971521 0.323449 0.086 Uiso 1 1 calc R U . . .
C22 C 0.51388(8) 0.37158(19) 0.70814(11) 0.0448(4) Uani 1 1 d . . . . .
H22A H 0.528665 0.275827 0.715277 0.067 Uiso 1 1 calc R U . . .
H22B H 0.512619 0.406376 0.769765 0.067 Uiso 1 1 calc R U . . .
H22C H 0.551916 0.422942 0.688941 0.067 Uiso 1 1 calc R U . . .
O1A O 0.0812(2) 0.0343(3) 0.4716(2) 0.0729(8) Uani 0.5 1 d . . P A 1
O1B O 0.0397(10) -0.183(2) 0.4864(13) 0.0736(18) Uani 0.5 1 d . . P A 1
N1A N 0.0707(2) -0.0872(4) 0.4415(3) 0.0495(8) Uani 0.5 1 d . . P A 1
O2A O 0.0877(2) -0.1153(3) 0.3659(2) 0.0627(7) Uani 0.5 1 d D . P A 1
O2X O 0.1755(11) 0.1261(17) 0.3374(14) 0.085(4) Uani 0.5 1 d D . P B 1
H2X H 0.142(3) 0.075(4) 0.349(7) 0.107(14) Uiso 0.5 1 d D U P C 1
H4X H 0.2226(16) 0.099(7) 0.361(4) 0.107(14) Uiso 0.5 1 d D U P D 1
N1A' N 0.13767(19) 0.0242(3) 0.3578(3) 0.0512(7) Uani 0.5 1 d . . P E 2
O1A' O 0.1215(2) -0.0909(3) 0.3190(2) 0.0724(8) Uani 0.5 1 d . . P E 2
O2B O 0.1599(11) 0.1176(18) 0.3177(13) 0.076(3) Uani 0.5 1 d . . P E 2
O2A' O 0.1313(2) 0.0461(3) 0.4398(3) 0.0783(9) Uani 0.5 1 d . . P E 2
O1X O 0.0468(12) -0.168(2) 0.4729(15) 0.096(4) Uani 0.5 1 d D . P F 2
H1X H 0.064(5) -0.117(8) 0.438(6) 0.107(14) Uiso 0.5 1 d D U P G 2
H3X H 0.013(3) -0.126(6) 0.491(4) 0.107(14) Uiso 0.5 1 d D U P H 2
 
loop_
 _atom_site_aniso_label
 _atom_site_aniso_U_11
 _atom_site_aniso_U_22
 _atom_site_aniso_U_33
 _atom_site_aniso_U_23
 _atom_site_aniso_U_13
 _atom_site_aniso_U_12
Fe1 0.02426(9) 0.02461(10) 0.02796(10) 0.00016(6) 0.00848(7) -0.00117(6)
O1 0.0394(5) 0.0278(4) 0.0289(4) -0.0060(3) 0.0144(4) -0.0096(4)
O2 0.0521(6) 0.0366(5) 0.0361(5) -0.0026(4) 0.0193(4) -0.0146(5)
O3 0.0271(4) 0.0436(5) 0.0292(4) 0.0030(4) 0.0117(3) 0.0065(4)
O4 0.0296(5) 0.0614(7) 0.0311(5) -0.0002(5) 0.0090(4) 0.0067(4)
N1 0.0281(5) 0.0366(6) 0.0313(5) 0.0030(4) 0.0135(4) 0.0023(4)
N2 0.0343(6) 0.0294(6) 0.0516(7) 0.0040(5) 0.0186(5) -0.0023(5)
N3 0.0314(5) 0.0308(6) 0.0376(6) -0.0002(5) 0.0051(5) 0.0025(4)
N4 0.0331(5) 0.0249(5) 0.0276(5) -0.0024(4) 0.0062(4) -0.0044(4)
C1 0.0319(6) 0.0277(6) 0.0316(6) -0.0008(5) 0.0071(5) -0.0022(5)
C2 0.0468(8) 0.0299(7) 0.0444(8) -0.0038(6) 0.0099(7) -0.0109(6)
C3 0.0605(10) 0.0360(8) 0.0437(8) -0.0157(6) 0.0096(7) -0.0116(7)
C4 0.0516(8) 0.0416(8) 0.0338(7) -0.0133(6) 0.0100(6) -0.0020(7)
C5 0.0324(6) 0.0331(6) 0.0298(6) -0.0051(5) 0.0091(5) 0.0014(5)
C6 0.0257(5) 0.0254(5) 0.0294(6) -0.0028(5) 0.0065(4) -0.0001(4)
C7 0.0344(6) 0.0425(7) 0.0276(6) -0.0028(5) 0.0126(5) 0.0057(6)
C8 0.0427(8) 0.0550(9) 0.0449(8) 0.0059(7) 0.0264(7) -0.0023(7)
C9 0.0489(9) 0.0471(9) 0.0546(9) 0.0170(7) 0.0257(7) -0.0020(7)
C10 0.0323(7) 0.0467(9) 0.0640(10) -0.0016(8) 0.0157(7) -0.0122(6)
C11 0.0253(6) 0.0549(10) 0.0592(10) 0.0006(8) 0.0093(6) 0.0016(6)
C12 0.0413(8) 0.0449(8) 0.0345(7) 0.0023(6) 0.0011(6) 0.0062(6)
C13 0.0397(7) 0.0445(8) 0.0323(7) -0.0070(6) 0.0013(6) -0.0011(6)
C14 0.0405(7) 0.0265(6) 0.0285(6) -0.0034(5) 0.0137(5) -0.0037(5)
C15 0.0293(6) 0.0313(6) 0.0342(6) 0.0005(5) 0.0124(5) 0.0004(5)
C16 0.0278(5) 0.0252(5) 0.0324(6) 0.0015(5) 0.0133(5) -0.0010(4)
C17 0.0340(6) 0.0250(6) 0.0344(6) -0.0008(5) 0.0158(5) -0.0010(5)
C18 0.0430(7) 0.0363(7) 0.0380(7) -0.0029(6) 0.0222(6) 0.0012(6)
C19 0.0385(7) 0.0460(8) 0.0508(8) -0.0034(7) 0.0259(6) 0.0061(6)
C20 0.0288(6) 0.0421(8) 0.0454(8) -0.0010(6) 0.0138(6) 0.0042(5)
C21 0.0734(12) 0.0511(10) 0.0504(9) 0.0025(8) 0.0263(9) -0.0248(9)
C22 0.0325(7) 0.0612(10) 0.0365(7) 0.0052(7) 0.0066(6) 0.0031(7)
O1A 0.084(2) 0.0657(19) 0.0674(18) -0.0237(15) 0.0243(17) 0.0044(16)
O1B 0.095(4) 0.058(4) 0.089(4) 0.011(3) 0.059(4) -0.003(3)
N1A 0.0459(15) 0.0517(19) 0.0439(15) 0.0010(14) 0.0066(12) 0.0171(14)
O2A 0.096(2) 0.0446(14) 0.0495(14) -0.0010(12) 0.0276(15) 0.0170(14)
O2X 0.076(4) 0.047(4) 0.138(11) 0.008(5) 0.046(6) 0.008(4)
N1A' 0.0449(15) 0.0376(14) 0.0615(19) -0.0002(14) 0.0062(13) 0.0085(12)
O1A' 0.092(2) 0.0337(13) 0.0719(19) -0.0033(13) 0.0027(17) 0.0015(14)
O2B 0.106(9) 0.045(3) 0.088(4) 0.000(3) 0.048(5) -0.011(4)
O2A' 0.104(3) 0.0597(18) 0.076(2) -0.0091(16) 0.037(2) -0.0027(18)
O1X 0.132(7) 0.063(5) 0.125(8) 0.016(4) 0.086(5) 0.005(4)
 
_geom_special_details
;
 All esds (except the esd in the dihedral angle between two l.s. planes)
 are estimated using the full covariance matrix.  The cell esds are taken
 into account individually in the estimation of esds in distances, angles
 and torsion angles; correlations between esds in cell parameters are only
 used when they are defined by crystal symmetry.  An approximate (isotropic)
 treatment of cell esds is used for estimating esds involving l.s. planes.
;
 
loop_
 _geom_bond_atom_site_label_1
 _geom_bond_atom_site_label_2
 _geom_bond_distance
 _geom_bond_site_symmetry_2
 _geom_bond_publ_flag
Fe1 O3 1.8733(9) . ?
Fe1 O1 1.8738(9) . ?
Fe1 N4 1.9267(11) . ?
Fe1 N1 1.9275(11) . ?
Fe1 N3 2.0011(11) . ?
Fe1 N2 2.0059(11) . ?
O1 C6 1.3073(14) . ?
O2 C1 1.3660(16) . ?
O2 C21 1.4254(18) . ?
O3 C16 1.3113(15) . ?
O4 C15 1.3611(16) . ?
O4 C22 1.4200(16) . ?
N1 C7 1.2865(18) . ?
N1 C8 1.4698(18) . ?
N2 C9 1.485(2) . ?
N2 C10 1.4891(19) . ?
N2 H2 0.9800 . ?
N3 C11 1.485(2) . ?
N3 C12 1.4861(19) . ?
N3 H3 0.9800 . ?
N4 C14 1.2793(17) . ?
N4 C13 1.4692(17) . ?
C1 C2 1.3776(18) . ?
C1 C6 1.4251(18) . ?
C2 C3 1.404(2) . ?
C2 H2A 0.9300 . ?
C3 C4 1.354(2) . ?
C3 H3A 0.9300 . ?
C4 C5 1.4168(19) . ?
C4 H4 0.9300 . ?
C5 C6 1.4124(17) . ?
C5 C7 1.429(2) . ?
C7 H7 0.9300 . ?
C8 C9 1.508(2) . ?
C8 H8A 0.9700 . ?
C8 H8B 0.9700 . ?
C9 H9A 0.9700 . ?
C9 H9B 0.9700 . ?
C10 C11 1.508(2) . ?
C10 H10A 0.9700 . ?
C10 H10B 0.9700 . ?
C11 H11A 0.9700 . ?
C11 H11B 0.9700 . ?
C12 C13 1.515(2) . ?
C12 H12A 0.9700 . ?
C12 H12B 0.9700 . ?
C13 H13A 0.9700 . ?
C13 H13B 0.9700 . ?
C14 C17 1.4387(18) . ?
C14 H14 0.9300 . ?
C15 C20 1.3735(18) . ?
C15 C16 1.4268(17) . ?
C16 C17 1.4098(17) . ?
C17 C18 1.4135(18) . ?
C18 C19 1.362(2) . ?
C18 H18 0.9300 . ?
C19 C20 1.397(2) . ?
C19 H19 0.9300 . ?
C20 H20 0.9300 . ?
C21 H21A 0.9600 . ?
C21 H21B 0.9600 . ?
C21 H21C 0.9600 . ?
C22 H22A 0.9600 . ?
C22 H22B 0.9600 . ?
C22 H22C 0.9600 . ?
O1A N1A 1.246(5) . ?
O1B N1A 1.358(16) . ?
N1A O2A 1.262(5) . ?
O2X H2X 0.84(2) . ?
O2X H4X 0.84(2) . ?
N1A' O2A' 1.246(6) . ?
N1A' O2B 1.215(16) . ?
N1A' O1A' 1.236(4) . ?
O1X H1X 0.84(2) . ?
O1X H3X 0.84(2) . ?
 
loop_
 _geom_angle_atom_site_label_1
 _geom_angle_atom_site_label_2
 _geom_angle_atom_site_label_3
 _geom_angle
 _geom_angle_site_symmetry_1
 _geom_angle_site_symmetry_3
 _geom_angle_publ_flag
O3 Fe1 O1 95.48(4) . . ?
O3 Fe1 N4 93.16(4) . . ?
O1 Fe1 N4 86.63(4) . . ?
O3 Fe1 N1 87.23(4) . . ?
O1 Fe1 N1 94.08(4) . . ?
N4 Fe1 N1 179.16(5) . . ?
O3 Fe1 N3 174.62(5) . . ?
O1 Fe1 N3 89.34(5) . . ?
N4 Fe1 N3 84.70(5) . . ?
N1 Fe1 N3 94.85(5) . . ?
O3 Fe1 N2 90.23(5) . . ?
O1 Fe1 N2 173.90(5) . . ?
N4 Fe1 N2 95.22(5) . . ?
N1 Fe1 N2 84.04(5) . . ?
N3 Fe1 N2 85.06(5) . . ?
C6 O1 Fe1 126.52(8) . . ?
C1 O2 C21 116.76(12) . . ?
C16 O3 Fe1 125.14(8) . . ?
C15 O4 C22 116.24(11) . . ?
C7 N1 C8 119.03(12) . . ?
C7 N1 Fe1 125.49(9) . . ?
C8 N1 Fe1 115.32(10) . . ?
C9 N2 C10 115.17(12) . . ?
C9 N2 Fe1 106.96(9) . . ?
C10 N2 Fe1 110.87(9) . . ?
C9 N2 H2 107.9 . . ?
C10 N2 H2 107.9 . . ?
Fe1 N2 H2 107.9 . . ?
C11 N3 C12 116.25(12) . . ?
C11 N3 Fe1 110.16(9) . . ?
C12 N3 Fe1 108.20(9) . . ?
C11 N3 H3 107.3 . . ?
C12 N3 H3 107.3 . . ?
Fe1 N3 H3 107.3 . . ?
C14 N4 C13 119.96(11) . . ?
C14 N4 Fe1 125.42(9) . . ?
C13 N4 Fe1 114.52(9) . . ?
O2 C1 C2 124.54(13) . . ?
O2 C1 C6 114.30(11) . . ?
C2 C1 C6 121.15(13) . . ?
C1 C2 C3 120.40(14) . . ?
C1 C2 H2A 119.8 . . ?
C3 C2 H2A 119.8 . . ?
C4 C3 C2 119.80(13) . . ?
C4 C3 H3A 120.1 . . ?
C2 C3 H3A 120.1 . . ?
C3 C4 C5 121.40(14) . . ?
C3 C4 H4 119.3 . . ?
C5 C4 H4 119.3 . . ?
C6 C5 C4 119.81(13) . . ?
C6 C5 C7 122.50(12) . . ?
C4 C5 C7 117.63(12) . . ?
O1 C6 C5 125.18(12) . . ?
O1 C6 C1 117.39(11) . . ?
C5 C6 C1 117.41(11) . . ?
N1 C7 C5 125.16(12) . . ?
N1 C7 H7 117.4 . . ?
C5 C7 H7 117.4 . . ?
N1 C8 C9 106.81(12) . . ?
N1 C8 H8A 110.4 . . ?
C9 C8 H8A 110.4 . . ?
N1 C8 H8B 110.4 . . ?
C9 C8 H8B 110.4 . . ?
H8A C8 H8B 108.6 . . ?
N2 C9 C8 109.22(12) . . ?
N2 C9 H9A 109.8 . . ?
C8 C9 H9A 109.8 . . ?
N2 C9 H9B 109.8 . . ?
C8 C9 H9B 109.8 . . ?
H9A C9 H9B 108.3 . . ?
N2 C10 C11 110.20(12) . . ?
N2 C10 H10A 109.6 . . ?
C11 C10 H10A 109.6 . . ?
N2 C10 H10B 109.6 . . ?
C11 C10 H10B 109.6 . . ?
H10A C10 H10B 108.1 . . ?
N3 C11 C10 109.79(12) . . ?
N3 C11 H11A 109.7 . . ?
C10 C11 H11A 109.7 . . ?
N3 C11 H11B 109.7 . . ?
C10 C11 H11B 109.7 . . ?
H11A C11 H11B 108.2 . . ?
N3 C12 C13 109.55(12) . . ?
N3 C12 H12A 109.8 . . ?
C13 C12 H12A 109.8 . . ?
N3 C12 H12B 109.8 . . ?
C13 C12 H12B 109.8 . . ?
H12A C12 H12B 108.2 . . ?
N4 C13 C12 106.60(11) . . ?
N4 C13 H13A 110.4 . . ?
C12 C13 H13A 110.4 . . ?
N4 C13 H13B 110.4 . . ?
C12 C13 H13B 110.4 . . ?
H13A C13 H13B 108.6 . . ?
N4 C14 C17 125.19(11) . . ?
N4 C14 H14 117.4 . . ?
C17 C14 H14 117.4 . . ?
O4 C15 C20 124.42(12) . . ?
O4 C15 C16 114.57(11) . . ?
C20 C15 C16 121.01(12) . . ?
O3 C16 C17 125.02(11) . . ?
O3 C16 C15 117.54(11) . . ?
C17 C16 C15 117.42(11) . . ?
C16 C17 C18 120.14(12) . . ?
C16 C17 C14 121.58(11) . . ?
C18 C17 C14 118.27(12) . . ?
C19 C18 C17 120.84(13) . . ?
C19 C18 H18 119.6 . . ?
C17 C18 H18 119.6 . . ?
C18 C19 C20 119.97(13) . . ?
C18 C19 H19 120.0 . . ?
C20 C19 H19 120.0 . . ?
C15 C20 C19 120.60(13) . . ?
C15 C20 H20 119.7 . . ?
C19 C20 H20 119.7 . . ?
O2 C21 H21A 109.5 . . ?
O2 C21 H21B 109.5 . . ?
H21A C21 H21B 109.5 . . ?
O2 C21 H21C 109.5 . . ?
H21A C21 H21C 109.5 . . ?
H21B C21 H21C 109.5 . . ?
O4 C22 H22A 109.5 . . ?
O4 C22 H22B 109.5 . . ?
H22A C22 H22B 109.5 . . ?
O4 C22 H22C 109.5 . . ?
H22A C22 H22C 109.5 . . ?
H22B C22 H22C 109.5 . . ?
O1A N1A O2A 116.9(4) . . ?
O1A N1A O1B 121.2(9) . . ?
O2A N1A O1B 121.8(9) . . ?
H2X O2X H4X 115(5) . . ?
O2A' N1A' O2B 118.7(9) . . ?
O2A' N1A' O1A' 120.1(4) . . ?
O2B N1A' O1A' 121.2(9) . . ?
H1X O1X H3X 110(5) . . ?
 
_refine_diff_density_max    0.372
_refine_diff_density_min   -0.319
_refine_diff_density_rms    0.047

_shelx_res_file
;
TITL a
    shelx.res
    created by SHELXL-2016/6 at 14:01:39 on 02-Oct-2020
CELL  0.71073  17.9547   9.6817  14.4568   90.000  110.178   90.000
ZERR     4.00   0.0003   0.0001   0.0002    0.000    0.002    0.000
LATT   1
SYMM  - X, 1/2 + Y, 1/2 - Z
SFAC  C    H    N    O    FE
UNIT  88 120 20 32 4
MERG   2
OMIT   -10   1   5
OMIT     1   3   7
OMIT     1   4   2
dfix 2.1 0.03 H2x O2a
sadi 0.01 o2x h4x o1x h3x o1x h1x o2x h2x
dfix 1.4 0.03 h1x h3x  h2x h4x
size 0.05 0.19 0.60
FMAP   2
PLAN   10
ACTA    58.00 NOHKL
BOND   $H
L.S.   35
WGHT    0.043800    0.553700
FVAR       4.21724   0.10669
MOLE    1
FE1   5    0.206959    0.518938    0.420725    11.00000    0.02426    0.02461 =
         0.02796    0.00016    0.00848   -0.00117
O1    4    0.257000    0.673793    0.390771    11.00000    0.03936    0.02782 =
         0.02885   -0.00597    0.01441   -0.00956
O2    4    0.328460    0.857557    0.321304    11.00000    0.05207    0.03662 =
         0.03612   -0.00255    0.01933   -0.01458
O3    4    0.300779    0.432322    0.499192    11.00000    0.02715    0.04356 =
         0.02915    0.00299    0.01172    0.00648
O4    4    0.437601    0.385752    0.634833    11.00000    0.02956    0.06135 =
         0.03109   -0.00020    0.00898    0.00674
N1    3    0.200819    0.597702    0.540334    11.00000    0.02807    0.03658 =
         0.03135    0.00303    0.01355    0.00226
N2    3    0.142889    0.365422    0.448994    11.00000    0.03427    0.02940 =
         0.05162    0.00397    0.01864   -0.00230
AFIX  13
H2    2    0.163514    0.277908    0.433700    11.00000   -1.20000
AFIX   0
N3    3    0.102176    0.593783    0.334281    11.00000    0.03137    0.03078 =
         0.03762   -0.00020    0.00515    0.00254
AFIX  13
H3    2    0.100913    0.691927    0.350264    11.00000   -1.20000
AFIX   0
N4    3    0.211665    0.438790    0.300882    11.00000    0.03310    0.02489 =
         0.02755   -0.00240    0.00620   -0.00443
C1    1    0.325575    0.883141    0.412929    11.00000    0.03193    0.02770 =
         0.03156   -0.00081    0.00710   -0.00222
C2    1    0.357940    0.997598    0.468998    11.00000    0.04683    0.02988 =
         0.04440   -0.00379    0.00988   -0.01088
AFIX  43
H2A   2    0.383935    1.063792    0.444711    11.00000   -1.20000
AFIX   0
C3    1    0.351922    1.014922    0.562561    11.00000    0.06047    0.03601 =
         0.04374   -0.01570    0.00960   -0.01161
AFIX  43
H3A   2    0.374019    1.092203    0.600244    11.00000   -1.20000
AFIX   0
C4    1    0.313859    0.918806    0.597769    11.00000    0.05157    0.04160 =
         0.03377   -0.01335    0.01002   -0.00199
AFIX  43
H4    2    0.310222    0.930892    0.659889    11.00000   -1.20000
AFIX   0
C5    1    0.279440    0.800178    0.542002    11.00000    0.03240    0.03311 =
         0.02983   -0.00512    0.00908    0.00138
C6    1    0.285823    0.779441    0.448315    11.00000    0.02569    0.02544 =
         0.02938   -0.00276    0.00646   -0.00011
C7    1    0.236133    0.708549    0.582186    11.00000    0.03440    0.04253 =
         0.02763   -0.00281    0.01264    0.00567
AFIX  43
H7    2    0.233237    0.730782    0.643437    11.00000   -1.20000
AFIX   0
C8    1    0.156286    0.515782    0.589308    11.00000    0.04274    0.05501 =
         0.04492    0.00588    0.02639   -0.00232
AFIX  23
H8A   2    0.102063    0.548727    0.570521    11.00000   -1.20000
H8B   2    0.180825    0.522845    0.660329    11.00000   -1.20000
AFIX   0
C9    1    0.157731    0.368203    0.556615    11.00000    0.04887    0.04713 =
         0.05464    0.01698    0.02565   -0.00196
AFIX  23
H9A   2    0.208946    0.327096    0.591960    11.00000   -1.20000
H9B   2    0.117262    0.315111    0.571092    11.00000   -1.20000
AFIX   0
C10   1    0.058015    0.376398    0.384959    11.00000    0.03235    0.04671 =
         0.06399   -0.00158    0.01566   -0.01218
AFIX  23
H10A  2    0.024602    0.340259    0.419625    11.00000   -1.20000
H10B  2    0.048816    0.321781    0.325800    11.00000   -1.20000
AFIX   0
C11   1    0.036660    0.525068    0.357243    11.00000    0.02531    0.05485 =
         0.05925    0.00064    0.00932    0.00163
AFIX  23
H11A  2   -0.011704    0.529312    0.300258    11.00000   -1.20000
H11B  2    0.027382    0.572593    0.411337    11.00000   -1.20000
AFIX   0
C12   1    0.098857    0.585119    0.230298    11.00000    0.04132    0.04490 =
         0.03452    0.00231    0.00109    0.00617
AFIX  23
H12A  2    0.125805    0.664001    0.214930    11.00000   -1.20000
H12B  2    0.044026    0.586572    0.186426    11.00000   -1.20000
AFIX   0
C13   1    0.138319    0.452839    0.215341    11.00000    0.03968    0.04453 =
         0.03232   -0.00704    0.00135   -0.00112
AFIX  23
H13A  2    0.103681    0.374445    0.211237    11.00000   -1.20000
H13B  2    0.150351    0.457596    0.154959    11.00000   -1.20000
AFIX   0
C14   1    0.273041    0.383337    0.290669    11.00000    0.04045    0.02653 =
         0.02853   -0.00344    0.01370   -0.00367
AFIX  43
H14   2    0.269018    0.354209    0.227825    11.00000   -1.20000
AFIX   0
C15   1    0.432905    0.360993    0.540304    11.00000    0.02926    0.03127 =
         0.03421    0.00047    0.01243    0.00041
C16   1    0.357041    0.388334    0.468000    11.00000    0.02783    0.02517 =
         0.03242    0.00153    0.01326   -0.00096
C17   1    0.347793    0.362457    0.368681    11.00000    0.03397    0.02499 =
         0.03437   -0.00083    0.01581   -0.00100
C18   1    0.412509    0.313242    0.343656    11.00000    0.04303    0.03625 =
         0.03800   -0.00294    0.02224    0.00121
AFIX  43
H18   2    0.405752    0.295578    0.278021    11.00000   -1.20000
AFIX   0
C19   1    0.484636    0.291364    0.414447    11.00000    0.03847    0.04601 =
         0.05081   -0.00343    0.02591    0.00607
AFIX  43
H19   2    0.527009    0.260587    0.396912    11.00000   -1.20000
AFIX   0
C20   1    0.494942    0.315182    0.513443    11.00000    0.02880    0.04215 =
         0.04540   -0.00099    0.01384    0.00417
AFIX  43
H20   2    0.544251    0.299878    0.561571    11.00000   -1.20000
AFIX   0
C21   1    0.365593    0.959758    0.280973    11.00000    0.07343    0.05114 =
         0.05045    0.00254    0.02627   -0.02485
AFIX 137
H21A  2    0.337762    1.045758    0.275365    11.00000   -1.50000
H21B  2    0.364352    0.930829    0.216942    11.00000   -1.50000
H21C  2    0.419676    0.971521    0.323449    11.00000   -1.50000
AFIX   0
C22   1    0.513877    0.371576    0.708141    11.00000    0.03251    0.06123 =
         0.03646    0.00519    0.00657    0.00305
AFIX 137
H22A  2    0.528665    0.275827    0.715277    11.00000   -1.50000
H22B  2    0.512619    0.406376    0.769765    11.00000   -1.50000
H22C  2    0.551916    0.422942    0.688941    11.00000   -1.50000
AFIX   0
MOLE    2
PART    1
O1A   4    0.081176    0.034269    0.471577    10.50000    0.08411    0.06569 =
         0.06744   -0.02375    0.02426    0.00439
O1B   4    0.039748   -0.183305    0.486424    10.50000    0.09528    0.05841 =
         0.08873    0.01069    0.05935   -0.00346
N1A   3    0.070721   -0.087240    0.441545    10.50000    0.04593    0.05167 =
         0.04395    0.00100    0.00661    0.01708
O2A   4    0.087709   -0.115311    0.365940    10.50000    0.09589    0.04458 =
         0.04947   -0.00098    0.02757    0.01695
O2X   4    0.175469    0.126064    0.337405    10.50000    0.07627    0.04732 =
         0.13786    0.00823    0.04625    0.00803
H2X   2    0.142239    0.074619    0.349025    10.50000   21.00000
H4X   2    0.222594    0.099286    0.360895    10.50000   21.00000
MOLE    3
PART    2
N1A'  3    0.137673    0.024194    0.357845    10.50000    0.04490    0.03757 =
         0.06148   -0.00015    0.00621    0.00847
O1A'  4    0.121515   -0.090860    0.319020    10.50000    0.09158    0.03374 =
         0.07186   -0.00334    0.00268    0.00146
O2B   4    0.159931    0.117602    0.317663    10.50000    0.10602    0.04513 =
         0.08785    0.00022    0.04759   -0.01051
O2A'  4    0.131322    0.046149    0.439751    10.50000    0.10365    0.05972 =
         0.07595   -0.00912    0.03661   -0.00272
O1X   4    0.046806   -0.168449    0.472852    10.50000    0.13153    0.06291 =
         0.12470    0.01567    0.08552    0.00505
H1X   2    0.064203   -0.117185    0.437971    10.50000   21.00000
H3X   2    0.013405   -0.125631    0.490599    10.50000   21.00000
HKLF    4


REM  a
REM R1 =  0.0310 for    5748 Fo > 4sig(Fo)  and  0.0384 for all    6700 data
REM    385 parameters refined using      9 restraints

END

WGHT      0.0443      0.5691

REM Highest difference peak  0.372,  deepest hole -0.319,  1-sigma level  0.047
Q1    1   0.3963  0.3860  0.5030  11.00000  0.05    0.37
Q2    1   0.3597  0.3990  0.4186  11.00000  0.05    0.32
Q3    1   0.2946  0.8566  0.5618  11.00000  0.05    0.32
Q4    1   0.3283  0.9539  0.4320  11.00000  0.05    0.30
Q5    1   0.3799  0.3539  0.3579  11.00000  0.05    0.30
Q6    1   0.2831  0.7860  0.4964  11.00000  0.05    0.30
Q7    1   0.4589  0.3210  0.5282  11.00000  0.05    0.30
Q8    1   0.3113  0.8238  0.4359  11.00000  0.05    0.30
Q9    1   0.2717  0.7371  0.5656  11.00000  0.05    0.29
Q10   1   0.2088  0.4978  0.3402  11.00000  0.05    0.28
;
_shelx_res_checksum   31152
