# Supplementary material for: Magnetism, Conductivity and Spin-Spin Interactions in Layered Hybrid Structure of Anionic Radicals [Ni(dmit)2] Alternated by Iron(III) Spin-Crossover Complex [Fe(III)(3-OMe-Sal2trien)] and Ferric Moiety Precursors
Source: Molecules. 2020 Oct 24;25(21):4922. doi: 10.3390/molecules25214922 (PMC7663777; doi:10.3390/molecules25214922)
Supplement: Supplementary file 1 [file molecules-25-04922-s001.zip › 3_100K.cif]

 
data_3-100K
 
_audit_creation_method            SHELXL-97 
_chemical_name_systematic 
; 
 ? 
; 
_chemical_name_common             ? 
_chemical_melting_point           ? 
_chemical_formula_moiety
 'C22 H28 Fe N4 O4, I'
_chemical_formula_sum 
 'C22 H28 Fe I N4 O4' 
_chemical_formula_weight          595.23 
 
loop_ 
 _atom_type_symbol 
 _atom_type_description 
 _atom_type_scat_dispersion_real 
 _atom_type_scat_dispersion_imag 
 _atom_type_scat_source 
 'C'  'C'   0.0033   0.0016 
 'International Tables Vol C Tables 4.2.6.8 and 6.1.1.4' 
 'H'  'H'   0.0000   0.0000 
 'International Tables Vol C Tables 4.2.6.8 and 6.1.1.4' 
 'N'  'N'   0.0061   0.0033 
 'International Tables Vol C Tables 4.2.6.8 and 6.1.1.4' 
 'O'  'O'   0.0106   0.0060 
 'International Tables Vol C Tables 4.2.6.8 and 6.1.1.4' 
 'Fe'  'Fe'   0.3463   0.8444 
 'International Tables Vol C Tables 4.2.6.8 and 6.1.1.4' 
 'I'  'I'  -0.4742   1.8119 
 'International Tables Vol C Tables 4.2.6.8 and 6.1.1.4' 
 
_symmetry_cell_setting            Monoclinic
_symmetry_space_group_name_H-M    'P 21/n'
_symmetry_space_group_name_Hall   '-P 2yn'
 
loop_ 
 _symmetry_equiv_pos_as_xyz 
 'x, y, z' 
 '-x+1/2, y+1/2, -z+1/2' 
 '-x, -y, -z' 
 'x-1/2, -y-1/2, z-1/2' 
 
_cell_length_a                    10.5497(7) 
_cell_length_b                    17.2230(11) 
_cell_length_c                    13.7678(9) 
_cell_angle_alpha                 90.00 
_cell_angle_beta                  106.1359(12) 
_cell_angle_gamma                 90.00 
_cell_volume                      2403.0(3) 
_cell_formula_units_Z             4 
_cell_measurement_temperature     100(2) 
_cell_measurement_reflns_used     791
_cell_measurement_theta_min       3
_cell_measurement_theta_max       29
 
_exptl_crystal_description        prism 
_exptl_crystal_colour             black 
_exptl_crystal_size_max           0.45 
_exptl_crystal_size_mid           0.43 
_exptl_crystal_size_min           0.35 
_exptl_crystal_density_meas       ? 
_exptl_crystal_density_diffrn     1.645 
_exptl_crystal_density_method     'not measured' 
_exptl_crystal_F_000              1196 
_exptl_absorpt_coefficient_mu     1.947 
_exptl_absorpt_correction_type    multi-scan
_exptl_absorpt_correction_T_min   0.474
_exptl_absorpt_correction_T_max   0.549
_exptl_absorpt_process_details    'SADABS'
 
_exptl_special_details 
; 
 ? 
; 
 
_diffrn_ambient_temperature       100(2) 
_diffrn_radiation_wavelength      0.71073 
_diffrn_radiation_type            MoK\a 
_diffrn_radiation_source          'fine-focus sealed tube' 
_diffrn_radiation_monochromator   graphite 
_diffrn_measurement_device_type   'Bruker APEX II CCD area detector''
_diffrn_measurement_method        'omega scans'
_diffrn_detector_area_resol_mean  ? 
_diffrn_reflns_number             18375 
_diffrn_reflns_av_R_equivalents   0.0236 
_diffrn_reflns_av_sigmaI/netI     0.0255 
_diffrn_reflns_limit_h_min        -14 
_diffrn_reflns_limit_h_max        14 
_diffrn_reflns_limit_k_min        -23 
_diffrn_reflns_limit_k_max        23 
_diffrn_reflns_limit_l_min        -18 
_diffrn_reflns_limit_l_max        17 
_diffrn_reflns_theta_min          1.94 
_diffrn_reflns_theta_max          29.00 
_reflns_number_total              6360 
_reflns_number_gt                 5558 
_reflns_threshold_expression      'I>2\s(I)'
 
_computing_data_collection        'Bruker APEX II'
_computing_cell_refinement        'Bruker SAINT'
_computing_data_reduction         'Bruker SAINT'
_computing_structure_solution     'SHELXS-97 (Sheldrick, 1997)'
_computing_structure_refinement   'SHELXL-97 (Sheldrick, 1997)'
_computing_molecular_graphics     'Bruker SHELXTL'
_computing_publication_material   'Bruker SHELXTL'
 
_refine_special_details 
; 
 Refinement of F^2^ against ALL reflections.  The weighted R-factor wR and 
 goodness of fit S are based on F^2^, conventional R-factors R are based 
 on F, with F set to zero for negative F^2^. The threshold expression of 
 F^2^ > 2sigma(F^2^) is used only for calculating R-factors(gt) etc. and is 
 not relevant to the choice of reflections for refinement.  R-factors based 
 on F^2^ are statistically about twice as large as those based on F, and R- 
 factors based on ALL data will be even larger. 
; 
 
_refine_ls_structure_factor_coef  Fsqd  
_refine_ls_matrix_type            full 
_refine_ls_weighting_scheme       calc  
_refine_ls_weighting_details 
 'calc w=1/[\s^2^(Fo^2^)+(0.0553P)^2^+0.8552P] where P=(Fo^2^+2Fc^2^)/3' 
_atom_sites_solution_primary      direct 
_atom_sites_solution_secondary    difmap 
_atom_sites_solution_hydrogens    geom 
_refine_ls_hydrogen_treatment     mixed 
_refine_ls_extinction_method      none 
_refine_ls_extinction_coef        ? 
_refine_ls_number_reflns          6360 
_refine_ls_number_parameters      297 
_refine_ls_number_restraints      0 
_refine_ls_R_factor_all           0.0337 
_refine_ls_R_factor_gt            0.0270 
_refine_ls_wR_factor_ref          0.0856 
_refine_ls_wR_factor_gt           0.0807 
_refine_ls_goodness_of_fit_ref    1.014 
_refine_ls_restrained_S_all       1.014 
_refine_ls_shift/su_max           0.018 
_refine_ls_shift/su_mean          0.001 
 
loop_ 
 _atom_site_label 
 _atom_site_type_symbol 
 _atom_site_fract_x 
 _atom_site_fract_y 
 _atom_site_fract_z 
 _atom_site_U_iso_or_equiv 
 _atom_site_adp_type 
 _atom_site_occupancy 
 _atom_site_symmetry_multiplicity 
 _atom_site_calc_flag 
 _atom_site_refinement_flags 
 _atom_site_disorder_assembly 
 _atom_site_disorder_group 
I1 I 0.162017(15) 0.188576(9) 0.657143(11) 0.02802(6) Uani 1 1 d . . . 
Fe1 Fe 0.62929(3) 0.126022(16) 0.85362(2) 0.01350(7) Uani 1 1 d . . . 
O1 O 0.65342(14) 0.05281(9) 0.75536(11) 0.0191(3) Uani 1 1 d . . . 
O2 O 0.73309(17) -0.00216(11) 0.60648(12) 0.0302(4) Uani 1 1 d . . . 
O3 O 0.75542(14) 0.09916(9) 0.97848(11) 0.0167(3) Uani 1 1 d . . . 
O4 O 0.87344(14) 0.03775(9) 1.15596(11) 0.0193(3) Uani 1 1 d . . . 
N1 N 0.46893(17) 0.05421(10) 0.86046(13) 0.0176(3) Uani 1 1 d . . . 
N2 N 0.53417(19) 0.19649(11) 0.94342(14) 0.0180(3) Uani 1 1 d . . . 
H2N H 0.585(3) 0.2173(16) 0.983(2) 0.018(7) Uiso 1 1 d . . . 
N3 N 0.52023(18) 0.20893(11) 0.74232(14) 0.0181(3) Uani 1 1 d . . . 
H3N H 0.445(3) 0.1899(15) 0.710(2) 0.024(7) Uiso 1 1 d . . . 
N4 N 0.78019(18) 0.19195(10) 0.81867(13) 0.0170(3) Uani 1 1 d . . . 
C1 C 0.6295(2) -0.03992(13) 0.62594(17) 0.0249(5) Uani 1 1 d . . . 
C2 C 0.5883(2) -0.00721(12) 0.70765(15) 0.0183(4) Uani 1 1 d . . . 
C3 C 0.4802(2) -0.04114(12) 0.73277(16) 0.0205(4) Uani 1 1 d . . . 
C4 C 0.4174(3) -0.10758(13) 0.67925(19) 0.0295(5) Uani 1 1 d . . . 
H4A H 0.3459 -0.1313 0.6973 0.035 Uiso 1 1 calc R . . 
C5 C 0.4599(3) -0.13737(14) 0.6019(2) 0.0354(6) Uani 1 1 d . . . 
H5A H 0.4170 -0.1815 0.5661 0.042 Uiso 1 1 calc R . . 
C6 C 0.5647(3) -0.10411(14) 0.57483(18) 0.0322(6) Uani 1 1 d . . . 
H6A H 0.5925 -0.1256 0.5206 0.039 Uiso 1 1 calc R . . 
C7 C 0.4258(2) -0.00711(12) 0.80813(16) 0.0203(4) Uani 1 1 d . . . 
H7A H 0.3515 -0.0322 0.8203 0.024 Uiso 1 1 calc R . . 
C8 C 0.3901(2) 0.08294(14) 0.92553(17) 0.0231(4) Uani 1 1 d . . . 
H8A H 0.3663 0.0393 0.9639 0.028 Uiso 1 1 calc R . . 
H8B H 0.3077 0.1069 0.8837 0.028 Uiso 1 1 calc R . . 
C9 C 0.4706(2) 0.14282(13) 0.99844(17) 0.0224(4) Uani 1 1 d . . . 
H9A H 0.4123 0.1722 1.0305 0.027 Uiso 1 1 calc R . . 
H9B H 0.5387 0.1163 1.0524 0.027 Uiso 1 1 calc R . . 
C10 C 0.4432(2) 0.25546(13) 0.88233(17) 0.0229(4) Uani 1 1 d . . . 
H10A H 0.4378 0.3011 0.9248 0.027 Uiso 1 1 calc R . . 
H10B H 0.3536 0.2332 0.8562 0.027 Uiso 1 1 calc R . . 
C11 C 0.4959(2) 0.27983(13) 0.79502(17) 0.0234(4) Uani 1 1 d . . . 
H11A H 0.4309 0.3134 0.7478 0.028 Uiso 1 1 calc R . . 
H11B H 0.5789 0.3095 0.8206 0.028 Uiso 1 1 calc R . . 
C12 C 0.5990(2) 0.22133(14) 0.66995(16) 0.0219(4) Uani 1 1 d . . . 
H12A H 0.5604 0.2642 0.6232 0.026 Uiso 1 1 calc R . . 
H12B H 0.5979 0.1737 0.6294 0.026 Uiso 1 1 calc R . . 
C13 C 0.7410(2) 0.24136(14) 0.72829(16) 0.0234(4) Uani 1 1 d . . . 
H13A H 0.8006 0.2323 0.6851 0.028 Uiso 1 1 calc R . . 
H13B H 0.7471 0.2968 0.7483 0.028 Uiso 1 1 calc R . . 
C14 C 0.9045(2) 0.17876(12) 0.85801(16) 0.0176(4) Uani 1 1 d . . . 
H14A H 0.9635 0.1992 0.8234 0.021 Uiso 1 1 calc R . . 
C15 C 0.95282(19) 0.06585(11) 1.10064(15) 0.0156(4) Uani 1 1 d . . . 
C16 C 0.88500(19) 0.10068(11) 1.00705(15) 0.0144(4) Uani 1 1 d . . . 
C17 C 0.9617(2) 0.13584(11) 0.94975(15) 0.0156(4) Uani 1 1 d . . . 
C18 C 1.1014(2) 0.13118(12) 0.98299(16) 0.0187(4) Uani 1 1 d . . . 
H18A H 1.1523 0.1544 0.9437 0.022 Uiso 1 1 calc R . . 
C19 C 1.1639(2) 0.09361(13) 1.07102(17) 0.0205(4) Uani 1 1 d . . . 
H19A H 1.2574 0.0894 1.0914 0.025 Uiso 1 1 calc R . . 
C20 C 1.0891(2) 0.06120(12) 1.13115(16) 0.0189(4) Uani 1 1 d . . . 
H20A H 1.1324 0.0360 1.1929 0.023 Uiso 1 1 calc R . . 
C21 C 0.7723(3) -0.02752(19) 0.52052(19) 0.0410(7) Uani 1 1 d . . . 
H21A H 0.8470 0.0039 0.5140 0.061 Uiso 1 1 calc R . . 
H21B H 0.6983 -0.0216 0.4595 0.061 Uiso 1 1 calc R . . 
H21C H 0.7987 -0.0822 0.5290 0.061 Uiso 1 1 calc R . . 
C22 C 0.9388(2) 0.00291(14) 1.25113(17) 0.0248(5) Uani 1 1 d . . . 
H22A H 0.8729 -0.0152 1.2841 0.037 Uiso 1 1 calc R . . 
H22B H 0.9965 0.0413 1.2944 0.037 Uiso 1 1 calc R . . 
H22C H 0.9917 -0.0412 1.2401 0.037 Uiso 1 1 calc R . . 
 
loop_ 
 _atom_site_aniso_label 
 _atom_site_aniso_U_11 
 _atom_site_aniso_U_22 
 _atom_site_aniso_U_33 
 _atom_site_aniso_U_23 
 _atom_site_aniso_U_13 
 _atom_site_aniso_U_12 
I1 0.02925(9) 0.02890(10) 0.02365(9) 0.00650(5) 0.00356(6) 0.00053(6) 
Fe1 0.01394(13) 0.01410(14) 0.01276(14) -0.00006(10) 0.00421(10) -0.00097(10) 
O1 0.0198(7) 0.0195(7) 0.0188(7) -0.0037(6) 0.0069(6) -0.0005(6) 
O2 0.0320(9) 0.0412(10) 0.0195(8) -0.0066(7) 0.0107(7) 0.0078(8) 
O3 0.0130(6) 0.0203(7) 0.0168(7) 0.0015(5) 0.0041(5) -0.0016(5) 
O4 0.0177(7) 0.0234(7) 0.0164(7) 0.0047(6) 0.0041(5) -0.0017(6) 
N1 0.0155(8) 0.0195(8) 0.0182(8) 0.0027(7) 0.0052(6) 0.0011(6) 
N2 0.0186(8) 0.0189(8) 0.0158(8) -0.0008(7) 0.0038(7) 0.0014(7) 
N3 0.0202(8) 0.0175(8) 0.0158(8) 0.0018(6) 0.0039(7) -0.0004(7) 
N4 0.0191(8) 0.0173(8) 0.0144(8) 0.0014(6) 0.0044(7) -0.0030(6) 
C1 0.0312(11) 0.0243(11) 0.0161(10) -0.0016(8) 0.0015(8) 0.0095(9) 
C2 0.0214(9) 0.0162(9) 0.0147(9) 0.0001(7) 0.0006(7) 0.0042(7) 
C3 0.0239(10) 0.0158(9) 0.0172(10) 0.0001(7) -0.0017(8) 0.0002(8) 
C4 0.0335(12) 0.0180(10) 0.0299(12) 0.0005(9) -0.0030(10) -0.0055(9) 
C5 0.0493(16) 0.0186(11) 0.0293(13) -0.0078(9) -0.0039(11) 0.0014(10) 
C6 0.0434(14) 0.0264(12) 0.0206(11) -0.0065(9) -0.0013(10) 0.0116(10) 
C7 0.0175(9) 0.0194(10) 0.0213(10) 0.0052(8) 0.0010(8) -0.0034(7) 
C8 0.0199(10) 0.0272(11) 0.0255(11) 0.0005(9) 0.0118(8) -0.0020(8) 
C9 0.0258(11) 0.0269(11) 0.0180(10) 0.0018(8) 0.0118(8) 0.0015(8) 
C10 0.0259(10) 0.0217(10) 0.0207(10) 0.0008(8) 0.0058(8) 0.0079(8) 
C11 0.0306(11) 0.0168(10) 0.0219(10) 0.0022(8) 0.0056(9) 0.0029(8) 
C12 0.0253(10) 0.0255(11) 0.0149(9) 0.0042(8) 0.0055(8) -0.0025(8) 
C13 0.0243(10) 0.0282(11) 0.0178(10) 0.0072(8) 0.0058(8) -0.0042(9) 
C14 0.0201(10) 0.0174(9) 0.0177(9) -0.0022(7) 0.0092(8) -0.0029(7) 
C15 0.0181(9) 0.0120(8) 0.0169(9) -0.0032(7) 0.0054(7) -0.0005(7) 
C16 0.0149(8) 0.0125(8) 0.0159(9) -0.0031(7) 0.0043(7) 0.0002(7) 
C17 0.0173(9) 0.0137(9) 0.0164(9) -0.0034(7) 0.0060(7) -0.0002(7) 
C18 0.0172(9) 0.0182(9) 0.0232(10) -0.0031(8) 0.0100(8) 0.0000(7) 
C19 0.0137(9) 0.0227(10) 0.0253(11) -0.0031(8) 0.0058(8) 0.0029(7) 
C20 0.0190(9) 0.0172(9) 0.0197(10) -0.0011(7) 0.0042(8) 0.0024(7) 
C21 0.0464(16) 0.0583(18) 0.0203(12) -0.0028(12) 0.0128(11) 0.0215(14) 
C22 0.0256(10) 0.0265(11) 0.0205(10) 0.0090(9) 0.0037(8) 0.0005(9) 
 
_geom_special_details 
; 
 All esds (except the esd in the dihedral angle between two l.s. planes) 
 are estimated using the full covariance matrix.  The cell esds are taken 
 into account individually in the estimation of esds in distances, angles 
 and torsion angles; correlations between esds in cell parameters are only 
 used when they are defined by crystal symmetry.  An approximate (isotropic) 
 treatment of cell esds is used for estimating esds involving l.s. planes. 
; 
 
loop_ 
 _geom_bond_atom_site_label_1 
 _geom_bond_atom_site_label_2 
 _geom_bond_distance 
 _geom_bond_site_symmetry_2 
 _geom_bond_publ_flag 
Fe1 O3 1.9152(14) . ? 
Fe1 O1 1.9174(15) . ? 
Fe1 N4 2.1168(18) . ? 
Fe1 N1 2.1188(18) . ? 
Fe1 N2 2.1675(19) . ? 
Fe1 N3 2.1751(18) . ? 
O1 C2 1.312(2) . ? 
O2 C1 1.361(3) . ? 
O2 C21 1.427(3) . ? 
O3 C16 1.313(2) . ? 
O4 C15 1.368(2) . ? 
O4 C22 1.432(2) . ? 
N1 C7 1.288(3) . ? 
N1 C8 1.467(3) . ? 
N2 C9 1.470(3) . ? 
N2 C10 1.487(3) . ? 
N2 H2N 0.74(3) . ? 
N3 C11 1.479(3) . ? 
N3 C12 1.479(3) . ? 
N3 H3N 0.86(3) . ? 
N4 C14 1.292(3) . ? 
N4 C13 1.469(3) . ? 
C1 C6 1.385(3) . ? 
C1 C2 1.429(3) . ? 
C2 C3 1.408(3) . ? 
C3 C4 1.421(3) . ? 
C3 C7 1.442(3) . ? 
C4 C5 1.365(4) . ? 
C4 H4A 0.9500 . ? 
C5 C6 1.385(4) . ? 
C5 H5A 0.9500 . ? 
C6 H6A 0.9500 . ? 
C7 H7A 0.9500 . ? 
C8 C9 1.523(3) . ? 
C8 H8A 0.9900 . ? 
C8 H8B 0.9900 . ? 
C9 H9A 0.9900 . ? 
C9 H9B 0.9900 . ? 
C10 C11 1.517(3) . ? 
C10 H10A 0.9900 . ? 
C10 H10B 0.9900 . ? 
C11 H11A 0.9900 . ? 
C11 H11B 0.9900 . ? 
C12 C13 1.530(3) . ? 
C12 H12A 0.9900 . ? 
C12 H12B 0.9900 . ? 
C13 H13A 0.9900 . ? 
C13 H13B 0.9900 . ? 
C14 C17 1.443(3) . ? 
C14 H14A 0.9500 . ? 
C15 C20 1.384(3) . ? 
C15 C16 1.421(3) . ? 
C16 C17 1.414(3) . ? 
C17 C18 1.419(3) . ? 
C18 C19 1.370(3) . ? 
C18 H18A 0.9500 . ? 
C19 C20 1.408(3) . ? 
C19 H19A 0.9500 . ? 
C20 H20A 0.9500 . ? 
C21 H21A 0.9800 . ? 
C21 H21B 0.9800 . ? 
C21 H21C 0.9800 . ? 
C22 H22A 0.9800 . ? 
C22 H22B 0.9800 . ? 
C22 H22C 0.9800 . ? 
 
loop_ 
 _geom_angle_atom_site_label_1 
 _geom_angle_atom_site_label_2 
 _geom_angle_atom_site_label_3 
 _geom_angle 
 _geom_angle_site_symmetry_1 
 _geom_angle_site_symmetry_3 
 _geom_angle_publ_flag 
O3 Fe1 O1 106.21(6) . . ? 
O3 Fe1 N4 87.41(7) . . ? 
O1 Fe1 N4 86.37(7) . . ? 
O3 Fe1 N1 100.56(6) . . ? 
O1 Fe1 N1 84.93(7) . . ? 
N4 Fe1 N1 169.56(7) . . ? 
O3 Fe1 N2 86.53(7) . . ? 
O1 Fe1 N2 160.73(7) . . ? 
N4 Fe1 N2 109.02(7) . . ? 
N1 Fe1 N2 78.43(7) . . ? 
O3 Fe1 N3 152.92(7) . . ? 
O1 Fe1 N3 94.74(7) . . ? 
N4 Fe1 N3 76.80(7) . . ? 
N1 Fe1 N3 98.16(7) . . ? 
N2 Fe1 N3 78.24(7) . . ? 
C2 O1 Fe1 135.88(14) . . ? 
C1 O2 C21 116.8(2) . . ? 
C16 O3 Fe1 132.04(13) . . ? 
C15 O4 C22 116.37(16) . . ? 
C7 N1 C8 116.48(18) . . ? 
C7 N1 Fe1 128.03(15) . . ? 
C8 N1 Fe1 115.17(14) . . ? 
C9 N2 C10 113.96(18) . . ? 
C9 N2 Fe1 106.96(13) . . ? 
C10 N2 Fe1 112.83(14) . . ? 
C9 N2 H2N 106(2) . . ? 
C10 N2 H2N 108(2) . . ? 
Fe1 N2 H2N 109(2) . . ? 
C11 N3 C12 114.70(18) . . ? 
C11 N3 Fe1 109.05(13) . . ? 
C12 N3 Fe1 106.44(13) . . ? 
C11 N3 H3N 107.9(19) . . ? 
C12 N3 H3N 109(2) . . ? 
Fe1 N3 H3N 110.1(19) . . ? 
C14 N4 C13 118.07(19) . . ? 
C14 N4 Fe1 123.38(14) . . ? 
C13 N4 Fe1 116.82(13) . . ? 
O2 C1 C6 126.2(2) . . ? 
O2 C1 C2 113.7(2) . . ? 
C6 C1 C2 120.0(2) . . ? 
O1 C2 C3 123.44(19) . . ? 
O1 C2 C1 118.3(2) . . ? 
C3 C2 C1 118.3(2) . . ? 
C2 C3 C4 119.9(2) . . ? 
C2 C3 C7 121.30(19) . . ? 
C4 C3 C7 118.7(2) . . ? 
C5 C4 C3 120.0(2) . . ? 
C5 C4 H4A 120.0 . . ? 
C3 C4 H4A 120.0 . . ? 
C4 C5 C6 120.9(2) . . ? 
C4 C5 H5A 119.5 . . ? 
C6 C5 H5A 119.5 . . ? 
C5 C6 C1 120.8(2) . . ? 
C5 C6 H6A 119.6 . . ? 
C1 C6 H6A 119.6 . . ? 
N1 C7 C3 125.9(2) . . ? 
N1 C7 H7A 117.0 . . ? 
C3 C7 H7A 117.0 . . ? 
N1 C8 C9 108.91(17) . . ? 
N1 C8 H8A 109.9 . . ? 
C9 C8 H8A 109.9 . . ? 
N1 C8 H8B 109.9 . . ? 
C9 C8 H8B 109.9 . . ? 
H8A C8 H8B 108.3 . . ? 
N2 C9 C8 109.69(18) . . ? 
N2 C9 H9A 109.7 . . ? 
C8 C9 H9A 109.7 . . ? 
N2 C9 H9B 109.7 . . ? 
C8 C9 H9B 109.7 . . ? 
H9A C9 H9B 108.2 . . ? 
N2 C10 C11 108.45(18) . . ? 
N2 C10 H10A 110.0 . . ? 
C11 C10 H10A 110.0 . . ? 
N2 C10 H10B 110.0 . . ? 
C11 C10 H10B 110.0 . . ? 
H10A C10 H10B 108.4 . . ? 
N3 C11 C10 108.18(18) . . ? 
N3 C11 H11A 110.1 . . ? 
C10 C11 H11A 110.1 . . ? 
N3 C11 H11B 110.1 . . ? 
C10 C11 H11B 110.1 . . ? 
H11A C11 H11B 108.4 . . ? 
N3 C12 C13 109.29(17) . . ? 
N3 C12 H12A 109.8 . . ? 
C13 C12 H12A 109.8 . . ? 
N3 C12 H12B 109.8 . . ? 
C13 C12 H12B 109.8 . . ? 
H12A C12 H12B 108.3 . . ? 
N4 C13 C12 108.54(17) . . ? 
N4 C13 H13A 110.0 . . ? 
C12 C13 H13A 110.0 . . ? 
N4 C13 H13B 110.0 . . ? 
C12 C13 H13B 110.0 . . ? 
H13A C13 H13B 108.4 . . ? 
N4 C14 C17 125.9(2) . . ? 
N4 C14 H14A 117.1 . . ? 
C17 C14 H14A 117.1 . . ? 
O4 C15 C20 123.78(18) . . ? 
O4 C15 C16 114.98(17) . . ? 
C20 C15 C16 121.24(19) . . ? 
O3 C16 C17 123.44(18) . . ? 
O3 C16 C15 118.89(18) . . ? 
C17 C16 C15 117.68(17) . . ? 
C16 C17 C18 120.02(19) . . ? 
C16 C17 C14 122.85(18) . . ? 
C18 C17 C14 117.12(19) . . ? 
C19 C18 C17 120.87(19) . . ? 
C19 C18 H18A 119.6 . . ? 
C17 C18 H18A 119.6 . . ? 
C18 C19 C20 119.79(19) . . ? 
C18 C19 H19A 120.1 . . ? 
C20 C19 H19A 120.1 . . ? 
C15 C20 C19 120.23(19) . . ? 
C15 C20 H20A 119.9 . . ? 
C19 C20 H20A 119.9 . . ? 
O2 C21 H21A 109.5 . . ? 
O2 C21 H21B 109.5 . . ? 
H21A C21 H21B 109.5 . . ? 
O2 C21 H21C 109.5 . . ? 
H21A C21 H21C 109.5 . . ? 
H21B C21 H21C 109.5 . . ? 
O4 C22 H22A 109.5 . . ? 
O4 C22 H22B 109.5 . . ? 
H22A C22 H22B 109.5 . . ? 
O4 C22 H22C 109.5 . . ? 
H22A C22 H22C 109.5 . . ? 
H22B C22 H22C 109.5 . . ? 
 
_diffrn_measured_fraction_theta_max    0.995 
_diffrn_reflns_theta_full              29.00 
_diffrn_measured_fraction_theta_full   0.995 
_refine_diff_density_max    0.849 
_refine_diff_density_min   -0.829 
_refine_diff_density_rms    0.078 

_publ_section_references 
;
Bruker, Programs APEX II, version 2.0-1; SAINT, version 7.23A;
SADABS, version 2004/1; XPREP, version 2005/2;
SHELXTL, version 6.1. Bruker AXS Inc., Madison, WI, USA, 2005.

G.M. Sheldrick, Programs SHELXS97 (crystal structure solution)
and SHELXL97 (crystal structure refinement), University  of
Gottingen, Germany, 1997.
;
