# Supplementary material for: Magnetism, Conductivity and Spin-Spin Interactions in Layered Hybrid Structure of Anionic Radicals [Ni(dmit)2] Alternated by Iron(III) Spin-Crossover Complex [Fe(III)(3-OMe-Sal2trien)] and Ferric Moiety Precursors
Source: Molecules. 2020 Oct 24;25(21):4922. doi: 10.3390/molecules25214922 (PMC7663777; doi:10.3390/molecules25214922)
Supplement: Supplementary file 1 [file molecules-25-04922-s001.zip › 3_293K.cif]

 
data_3-293K
 
_audit_creation_method            'SHELXL-2017/1'
_shelx_SHELXL_version_number      '2017/1'
_chemical_name_systematic         ?
_chemical_name_common             ?
_chemical_melting_point           ?
_chemical_formula_moiety          ?
_chemical_formula_sum
 'C22 H28 Fe I N4 O4' 
_chemical_formula_weight          595.23

loop_
 _atom_type_symbol
 _atom_type_description
 _atom_type_scat_dispersion_real
 _atom_type_scat_dispersion_imag
 _atom_type_scat_source
 'C'  'C'   0.0033   0.0016
 'International Tables Vol C Tables 4.2.6.8 and 6.1.1.4'
 'H'  'H'   0.0000   0.0000
 'International Tables Vol C Tables 4.2.6.8 and 6.1.1.4'
 'N'  'N'   0.0061   0.0033
 'International Tables Vol C Tables 4.2.6.8 and 6.1.1.4'
 'O'  'O'   0.0106   0.0060
 'International Tables Vol C Tables 4.2.6.8 and 6.1.1.4'
 'Fe'  'Fe'   0.3463   0.8444
 'International Tables Vol C Tables 4.2.6.8 and 6.1.1.4'
 'I'  'I'  -0.4742   1.8119
 'International Tables Vol C Tables 4.2.6.8 and 6.1.1.4'
 
_space_group_crystal_system       monoclinic
_space_group_IT_number            14
_space_group_name_H-M_alt         'P 21/n'
_space_group_name_Hall            '-P 2yn'
 
_shelx_space_group_comment
;
The symmetry employed for this shelxl refinement is uniquely defined
by the following loop, which should always be used as a source of
symmetry information in preference to the above space-group names.
They are only intended as comments.
;
 
loop_
 _space_group_symop_operation_xyz
 'x, y, z'
 '-x+1/2, y+1/2, -z+1/2'
 '-x, -y, -z'
 'x-1/2, -y-1/2, z-1/2'
 
_cell_length_a                    10.6616(3)
_cell_length_b                    17.6910(3)
_cell_length_c                    13.4855(2)
_cell_angle_alpha                 90
_cell_angle_beta                  104.866(2)
_cell_angle_gamma                 90
_cell_volume                      2458.42(9)
_cell_formula_units_Z             4
_cell_measurement_temperature     293(2)
_cell_measurement_reflns_used     11523
_cell_measurement_theta_min       1.9350
_cell_measurement_theta_max       31.2620
 
_exptl_crystal_description        prism
_exptl_crystal_colour             black
_exptl_crystal_density_meas       ?
_exptl_crystal_density_method     ?
_exptl_crystal_density_diffrn     1.608          
_exptl_crystal_F_000              1196
_exptl_transmission_factor_min    ?
_exptl_transmission_factor_max    ?
_exptl_crystal_size_max           0.570
_exptl_crystal_size_mid           0.365
_exptl_crystal_size_min           0.150
_exptl_absorpt_coefficient_mu     1.903
_shelx_estimated_absorpt_T_min    0.410
_shelx_estimated_absorpt_T_max    0.763
_exptl_absorpt_correction_T_min   0.68904
_exptl_absorpt_correction_T_max   1.00000
_exptl_absorpt_correction_type    multi-scan
_exptl_absorpt_process_details
;
CrysAlisPro 1.171.38.43 (Rigaku Oxford Diffraction, 2015)
Empirical absorption correction using spherical harmonics,
 implemented in SCALE3 ABSPACK scaling algorithm.
;
_diffrn_ambient_temperature       293(2)
_diffrn_radiation_wavelength      0.71073
_diffrn_radiation_type            MoK\a
_diffrn_source                    ?
_diffrn_measurement_device_type   'Xcalibur, AtlasS2, Gemini'
_diffrn_measurement_method        ?
_diffrn_detector_area_resol_mean  ?
_diffrn_reflns_number             36353
_diffrn_reflns_av_unetI/netI      0.0218
_diffrn_reflns_av_R_equivalents   0.0260
_diffrn_reflns_limit_h_min        -15
_diffrn_reflns_limit_h_max        16
_diffrn_reflns_limit_k_min        -26
_diffrn_reflns_limit_k_max        24
_diffrn_reflns_limit_l_min        -20
_diffrn_reflns_limit_l_max        20
_diffrn_reflns_theta_min          1.941
_diffrn_reflns_theta_max          32.714
_diffrn_reflns_theta_full         26.000
_diffrn_measured_fraction_theta_max   0.934
_diffrn_measured_fraction_theta_full  0.999
_diffrn_reflns_Laue_measured_fraction_max    0.934
_diffrn_reflns_Laue_measured_fraction_full   0.999
_diffrn_reflns_point_group_measured_fraction_max   0.934
_diffrn_reflns_point_group_measured_fraction_full  0.999
_reflns_number_total              8470
_reflns_number_gt                 5887
_reflns_threshold_expression      'I > 2\s(I)'
_reflns_Friedel_coverage          0.000
_reflns_Friedel_fraction_max      .
_reflns_Friedel_fraction_full     .
 
_reflns_special_details
;
 Reflections were merged by SHELXL according to the crystal
 class for the calculation of statistics and refinement.
 
 _reflns_Friedel_fraction is defined as the number of unique
 Friedel pairs measured divided by the number that would be
 possible theoretically, ignoring centric projections and
 systematic absences.
;
 
_computing_data_collection        'CrysAlisPro 1.171.38.43 (Rigaku OD, 2015)'
_computing_cell_refinement        'CrysAlisPro 1.171.38.43 (Rigaku OD, 2015)'
_computing_data_reduction         'CrysAlisPro 1.171.38.43 (Rigaku OD, 2015)'
_computing_structure_solution     'SHELXS-2017/1 (Sheldrick, 2017)'
_computing_structure_refinement   'SHELXL-2017/1 (Sheldrick, 2017)'
_computing_molecular_graphics     ?
_computing_publication_material   ?
_refine_special_details           ?
_refine_ls_structure_factor_coef  Fsqd
_refine_ls_matrix_type            full
_refine_ls_weighting_scheme       calc
_refine_ls_weighting_details
'w=1/[\s^2^(Fo^2^)+(0.0824P)^2^+2.1093P] where P=(Fo^2^+2Fc^2^)/3'
_atom_sites_solution_primary      ?
_atom_sites_solution_secondary    ?
_atom_sites_solution_hydrogens    geom
_refine_ls_hydrogen_treatment     constr
_refine_ls_extinction_method      none
_refine_ls_extinction_coef        .
_refine_ls_number_reflns          8470
_refine_ls_number_parameters      291
_refine_ls_number_restraints      0
_refine_ls_R_factor_all           0.0828
_refine_ls_R_factor_gt            0.0568
_refine_ls_wR_factor_ref          0.1758
_refine_ls_wR_factor_gt           0.1605
_refine_ls_goodness_of_fit_ref    1.078
_refine_ls_restrained_S_all       1.078
_refine_ls_shift/su_max           0.001
_refine_ls_shift/su_mean          0.000
 
loop_
 _atom_site_label
 _atom_site_type_symbol
 _atom_site_fract_x
 _atom_site_fract_y
 _atom_site_fract_z
 _atom_site_U_iso_or_equiv
 _atom_site_adp_type
 _atom_site_occupancy
 _atom_site_site_symmetry_order  
 _atom_site_calc_flag
 _atom_site_refinement_flags_posn
 _atom_site_refinement_flags_adp
 _atom_site_refinement_flags_occupancy
 _atom_site_disorder_assembly
 _atom_site_disorder_group
I1 I 0.17229(3) 0.18803(2) 0.66024(2) 0.07616(14) Uani 1 1 d . . . . .
Fe1 Fe 0.63247(4) 0.12662(2) 0.85474(3) 0.03871(12) Uani 1 1 d . . . . .
O1 O 0.6552(3) 0.05355(15) 0.75601(19) 0.0541(6) Uani 1 1 d . . . . .
O2 O 0.7368(4) -0.0049(3) 0.6076(3) 0.1011(13) Uani 1 1 d . . . . .
O3 O 0.7547(2) 0.09968(14) 0.97949(17) 0.0455(5) Uani 1 1 d . . . . .
O4 O 0.8681(2) 0.03856(15) 1.15781(18) 0.0528(6) Uani 1 1 d . . . . .
N1 N 0.4735(3) 0.05893(15) 0.8658(2) 0.0447(6) Uani 1 1 d . . . . .
N2 N 0.5396(3) 0.19783(16) 0.9476(2) 0.0497(6) Uani 1 1 d . . . . .
H2 H 0.608028 0.224845 0.997357 0.060 Uiso 1 1 calc R U . . .
N3 N 0.5277(3) 0.20687(17) 0.7417(2) 0.0519(7) Uani 1 1 d . . . . .
H3 H 0.443786 0.184880 0.706310 0.062 Uiso 1 1 calc R U . . .
N4 N 0.7820(3) 0.18884(16) 0.8162(2) 0.0489(6) Uani 1 1 d . . . . .
C1 C 0.6338(5) -0.0409(3) 0.6311(3) 0.0756(14) Uani 1 1 d . . . . .
C2 C 0.5913(4) -0.0059(2) 0.7121(2) 0.0503(8) Uani 1 1 d . . . . .
C3 C 0.4859(4) -0.0365(2) 0.7403(3) 0.0543(8) Uani 1 1 d . . . . .
C4 C 0.4261(6) -0.1036(2) 0.6904(4) 0.0809(14) Uani 1 1 d . . . . .
H4 H 0.356890 -0.125419 0.710046 0.097 Uiso 1 1 calc R U . . .
C5 C 0.4700(8) -0.1348(3) 0.6154(5) 0.104(2) Uani 1 1 d . . . . .
H5 H 0.429927 -0.178249 0.583268 0.125 Uiso 1 1 calc R U . . .
C6 C 0.5730(7) -0.1044(3) 0.5842(4) 0.098(2) Uani 1 1 d . . . . .
H6 H 0.600930 -0.127126 0.531406 0.117 Uiso 1 1 calc R U . . .
C7 C 0.4318(3) -0.0014(2) 0.8150(3) 0.0531(8) Uani 1 1 d . . . . .
H7 H 0.359248 -0.024290 0.828177 0.064 Uiso 1 1 calc R U . . .
C8 C 0.3964(4) 0.0891(3) 0.9334(3) 0.0606(9) Uani 1 1 d . . . . .
H8A H 0.372198 0.048419 0.973038 0.073 Uiso 1 1 calc R U . . .
H8B H 0.317692 0.112454 0.892623 0.073 Uiso 1 1 calc R U . . .
C9 C 0.4766(4) 0.1466(3) 1.0042(3) 0.0614(9) Uani 1 1 d . . . . .
H9A H 0.421490 0.175249 1.037613 0.074 Uiso 1 1 calc R U . . .
H9B H 0.541958 0.121022 1.056946 0.074 Uiso 1 1 calc R U . . .
C10 C 0.4528(4) 0.2546(2) 0.8853(3) 0.0637(10) Uani 1 1 d . . . . .
H10A H 0.447903 0.298812 0.926716 0.076 Uiso 1 1 calc R U . . .
H10B H 0.366093 0.233872 0.860879 0.076 Uiso 1 1 calc R U . . .
C11 C 0.5046(5) 0.2768(2) 0.7951(3) 0.0668(11) Uani 1 1 d . . . . .
H11A H 0.442451 0.308797 0.748454 0.080 Uiso 1 1 calc R U . . .
H11B H 0.585043 0.304787 0.818754 0.080 Uiso 1 1 calc R U . . .
C12 C 0.6056(4) 0.2184(3) 0.6664(3) 0.0638(10) Uani 1 1 d . . . . .
H12A H 0.569635 0.259663 0.620634 0.077 Uiso 1 1 calc R U . . .
H12B H 0.603584 0.173010 0.625654 0.077 Uiso 1 1 calc R U . . .
C13 C 0.7440(4) 0.2364(3) 0.7238(3) 0.0688(11) Uani 1 1 d . . . . .
H13A H 0.801597 0.226938 0.679886 0.083 Uiso 1 1 calc R U . . .
H13B H 0.751083 0.289351 0.743085 0.083 Uiso 1 1 calc R U . . .
C14 C 0.9038(4) 0.17659(18) 0.8561(3) 0.0468(7) Uani 1 1 d . . . . .
H14 H 0.961717 0.196759 0.822007 0.056 Uiso 1 1 calc R U . . .
C15 C 0.9473(3) 0.06603(16) 1.1015(2) 0.0405(6) Uani 1 1 d . . . . .
C16 C 0.8822(3) 0.10077(16) 1.0074(2) 0.0386(6) Uani 1 1 d . . . . .
C17 C 0.9580(3) 0.13479(17) 0.9480(2) 0.0419(6) Uani 1 1 d . . . . .
C18 C 1.0945(3) 0.1300(2) 0.9812(3) 0.0515(7) Uani 1 1 d . . . . .
H18 H 1.144565 0.152015 0.941709 0.062 Uiso 1 1 calc R U . . .
C19 C 1.1543(3) 0.0941(2) 1.0694(3) 0.0559(8) Uani 1 1 d . . . . .
H19 H 1.244328 0.090888 1.089026 0.067 Uiso 1 1 calc R U . . .
C20 C 1.0807(3) 0.0617(2) 1.1316(3) 0.0505(7) Uani 1 1 d . . . . .
H20 H 1.121926 0.037551 1.192459 0.061 Uiso 1 1 calc R U . . .
C21 C 0.7737(8) -0.0262(5) 0.5177(5) 0.133(3) Uani 1 1 d . . . . .
H21A H 0.817811 -0.074009 0.528849 0.199 Uiso 1 1 calc R U . . .
H21B H 0.830574 0.011393 0.501995 0.199 Uiso 1 1 calc R U . . .
H21C H 0.697754 -0.030562 0.461497 0.199 Uiso 1 1 calc R U . . .
C22 C 0.9292(4) 0.0042(3) 1.2532(3) 0.0679(11) Uani 1 1 d . . . . .
H22A H 0.985520 -0.035531 1.242248 0.102 Uiso 1 1 calc R U . . .
H22B H 0.864278 -0.016500 1.283287 0.102 Uiso 1 1 calc R U . . .
H22C H 0.979031 0.041353 1.298519 0.102 Uiso 1 1 calc R U . . .
 
loop_
 _atom_site_aniso_label
 _atom_site_aniso_U_11
 _atom_site_aniso_U_22
 _atom_site_aniso_U_33
 _atom_site_aniso_U_23
 _atom_site_aniso_U_13
 _atom_site_aniso_U_12
I1 0.0774(2) 0.0780(2) 0.06342(19) 0.01784(13) 0.00052(15) 0.00106(14)
Fe1 0.0389(2) 0.0406(2) 0.0349(2) 0.00123(15) 0.00640(15) -0.00418(16)
O1 0.0537(14) 0.0586(14) 0.0521(13) -0.0122(11) 0.0177(11) -0.0064(11)
O2 0.096(3) 0.151(4) 0.0607(19) -0.031(2) 0.0281(19) 0.012(3)
O3 0.0372(11) 0.0553(12) 0.0420(10) 0.0072(9) 0.0065(8) -0.0021(9)
O4 0.0469(13) 0.0643(15) 0.0456(12) 0.0116(10) 0.0087(10) -0.0015(11)
N1 0.0388(13) 0.0478(13) 0.0468(13) 0.0077(11) 0.0099(10) 0.0002(10)
N2 0.0520(16) 0.0509(15) 0.0416(13) -0.0038(11) 0.0039(11) 0.0056(12)
N3 0.0547(17) 0.0508(15) 0.0435(14) 0.0082(11) 0.0005(12) -0.0045(12)
N4 0.0534(16) 0.0516(15) 0.0401(13) 0.0064(11) 0.0090(12) -0.0120(12)
C1 0.089(3) 0.079(3) 0.0451(18) -0.0176(19) -0.007(2) 0.029(2)
C2 0.0559(19) 0.0498(17) 0.0366(14) -0.0032(12) -0.0036(13) 0.0101(14)
C3 0.061(2) 0.0426(16) 0.0480(17) 0.0017(13) -0.0066(15) -0.0018(14)
C4 0.100(4) 0.051(2) 0.076(3) -0.003(2) -0.006(3) -0.015(2)
C5 0.137(6) 0.060(3) 0.088(4) -0.027(3) -0.023(4) 0.009(3)
C6 0.125(5) 0.081(3) 0.065(3) -0.030(3) -0.015(3) 0.030(3)
C7 0.0441(17) 0.0516(18) 0.0574(19) 0.0114(15) 0.0018(14) -0.0100(14)
C8 0.0479(19) 0.078(2) 0.062(2) 0.0073(19) 0.0247(17) 0.0017(17)
C9 0.065(2) 0.077(3) 0.0474(18) 0.0031(17) 0.0236(17) 0.0104(19)
C10 0.071(3) 0.056(2) 0.060(2) -0.0019(17) 0.0096(19) 0.0161(18)
C11 0.084(3) 0.0455(18) 0.065(2) 0.0077(17) 0.007(2) 0.0043(18)
C12 0.074(3) 0.074(2) 0.0385(16) 0.0155(16) 0.0043(16) -0.012(2)
C13 0.066(2) 0.082(3) 0.054(2) 0.025(2) 0.0089(18) -0.015(2)
C14 0.0503(18) 0.0466(16) 0.0474(16) -0.0037(13) 0.0195(14) -0.0091(13)
C15 0.0405(14) 0.0364(13) 0.0442(14) -0.0042(11) 0.0103(11) 0.0001(11)
C16 0.0385(14) 0.0366(13) 0.0396(13) -0.0059(10) 0.0081(11) -0.0004(11)
C17 0.0417(15) 0.0402(14) 0.0445(14) -0.0074(11) 0.0121(12) -0.0005(11)
C18 0.0424(17) 0.0535(18) 0.063(2) -0.0069(15) 0.0216(15) -0.0002(14)
C19 0.0353(16) 0.062(2) 0.070(2) -0.0091(17) 0.0139(15) 0.0038(14)
C20 0.0428(16) 0.0508(17) 0.0535(17) -0.0033(14) 0.0044(13) 0.0081(13)
C21 0.138(6) 0.200(8) 0.062(3) -0.019(4) 0.030(4) 0.060(6)
C22 0.066(2) 0.075(3) 0.056(2) 0.0233(19) 0.0038(18) 0.000(2)
 
_geom_special_details
;
 All esds (except the esd in the dihedral angle between two l.s. planes)
 are estimated using the full covariance matrix.  The cell esds are taken
 into account individually in the estimation of esds in distances, angles
 and torsion angles; correlations between esds in cell parameters are only
 used when they are defined by crystal symmetry.  An approximate (isotropic)
 treatment of cell esds is used for estimating esds involving l.s. planes.
;
 
loop_
 _geom_bond_atom_site_label_1
 _geom_bond_atom_site_label_2
 _geom_bond_distance
 _geom_bond_site_symmetry_2
 _geom_bond_publ_flag
Fe1 O3 1.905(2) . ?
Fe1 O1 1.915(2) . ?
Fe1 N4 2.109(3) . ?
Fe1 N1 2.111(3) . ?
Fe1 N3 2.171(3) . ?
Fe1 N2 2.184(3) . ?
O1 C2 1.310(4) . ?
O2 C1 1.375(7) . ?
O2 C21 1.418(6) . ?
O3 C16 1.314(4) . ?
O4 C15 1.362(4) . ?
O4 C22 1.421(4) . ?
N1 C7 1.284(5) . ?
N1 C8 1.476(5) . ?
N2 C9 1.456(5) . ?
N2 C10 1.474(5) . ?
N3 C12 1.481(5) . ?
N3 C11 1.484(5) . ?
N4 C14 1.291(5) . ?
N4 C13 1.473(5) . ?
C1 C6 1.369(8) . ?
C1 C2 1.426(6) . ?
C2 C3 1.386(6) . ?
C3 C7 1.425(6) . ?
C3 C4 1.431(5) . ?
C4 C5 1.338(9) . ?
C5 C6 1.382(10) . ?
C8 C9 1.503(6) . ?
C10 C11 1.511(7) . ?
C12 C13 1.514(6) . ?
C14 C17 1.431(5) . ?
C15 C20 1.377(5) . ?
C15 C16 1.420(4) . ?
C16 C17 1.412(4) . ?
C17 C18 1.411(5) . ?
C18 C19 1.355(6) . ?
C19 C20 1.409(5) . ?
 
loop_
 _geom_angle_atom_site_label_1
 _geom_angle_atom_site_label_2
 _geom_angle_atom_site_label_3
 _geom_angle
 _geom_angle_site_symmetry_1
 _geom_angle_site_symmetry_3
 _geom_angle_publ_flag
O3 Fe1 O1 105.38(11) . . ?
O3 Fe1 N4 87.65(11) . . ?
O1 Fe1 N4 86.72(11) . . ?
O3 Fe1 N1 100.11(10) . . ?
O1 Fe1 N1 85.02(11) . . ?
N4 Fe1 N1 169.91(11) . . ?
O3 Fe1 N3 153.59(11) . . ?
O1 Fe1 N3 95.01(12) . . ?
N4 Fe1 N3 76.76(12) . . ?
N1 Fe1 N3 98.20(11) . . ?
O3 Fe1 N2 86.91(11) . . ?
O1 Fe1 N2 160.82(12) . . ?
N4 Fe1 N2 108.82(12) . . ?
N1 Fe1 N2 78.26(12) . . ?
N3 Fe1 N2 78.35(12) . . ?
C2 O1 Fe1 135.5(2) . . ?
C1 O2 C21 119.1(5) . . ?
C16 O3 Fe1 132.2(2) . . ?
C15 O4 C22 116.9(3) . . ?
C7 N1 C8 117.3(3) . . ?
C7 N1 Fe1 127.5(3) . . ?
C8 N1 Fe1 115.0(2) . . ?
C9 N2 C10 114.7(3) . . ?
C9 N2 Fe1 106.2(2) . . ?
C10 N2 Fe1 112.2(2) . . ?
C12 N3 C11 114.2(3) . . ?
C12 N3 Fe1 107.0(2) . . ?
C11 N3 Fe1 108.9(2) . . ?
C14 N4 C13 118.5(3) . . ?
C14 N4 Fe1 123.6(2) . . ?
C13 N4 Fe1 116.5(2) . . ?
C6 C1 O2 125.9(5) . . ?
C6 C1 C2 120.3(6) . . ?
O2 C1 C2 113.9(4) . . ?
O1 C2 C3 123.6(3) . . ?
O1 C2 C1 117.7(4) . . ?
C3 C2 C1 118.7(4) . . ?
C2 C3 C7 121.9(3) . . ?
C2 C3 C4 119.3(4) . . ?
C7 C3 C4 118.8(4) . . ?
C5 C4 C3 119.9(6) . . ?
C4 C5 C6 121.9(5) . . ?
C1 C6 C5 119.9(6) . . ?
N1 C7 C3 126.3(3) . . ?
N1 C8 C9 108.7(3) . . ?
N2 C9 C8 110.6(3) . . ?
N2 C10 C11 109.3(4) . . ?
N3 C11 C10 108.3(3) . . ?
N3 C12 C13 108.9(3) . . ?
N4 C13 C12 109.4(3) . . ?
N4 C14 C17 125.9(3) . . ?
O4 C15 C20 123.9(3) . . ?
O4 C15 C16 114.9(3) . . ?
C20 C15 C16 121.2(3) . . ?
O3 C16 C17 123.0(3) . . ?
O3 C16 C15 118.9(3) . . ?
C17 C16 C15 118.2(3) . . ?
C18 C17 C16 119.3(3) . . ?
C18 C17 C14 117.4(3) . . ?
C16 C17 C14 123.3(3) . . ?
C19 C18 C17 121.4(3) . . ?
C18 C19 C20 120.4(3) . . ?
C15 C20 C19 119.5(3) . . ?
 
_refine_diff_density_max    2.364
_refine_diff_density_min   -1.762
_refine_diff_density_rms    0.096
